# Supplementary material for: Highly regioselective lithiation of pyridines bearing an oxetane unit by n-butyllithium
Source: Royal Society of Chemistry journal article supplement (doi:10.1039/c4cc03766a), 2014-01-01

# Highly Regioselective Lithiation of Pyridines Bearing an Oxetane Unit by *n*-Buthyllithium

Guy Rouquet,<sup>\* a</sup> David C. Blakemore<sup>b</sup> and Steven V. Ley<sup>a</sup>

## Table of Contents

|      |                                                                                                                  |         |
|------|------------------------------------------------------------------------------------------------------------------|---------|
| I.   | Materials and Methods.....                                                                                       | S2      |
| II.  | Synthesis of Starting Oxetane Pyridine and Spectroscopic Data for compounds 1, 5, 6 and 7.....                   | S3-S5   |
| III. | <i>O</i> -lithiation of Oxetane Pyridine Derivatives and Spectroscopic Data for compounds 2a-l, 3a, 4, 8-10..... | S5-S15  |
| IV.  | Suzuki coupling of iodide 2e and Spectroscopic Data for compounds 11-13.....                                     | S15-S17 |
| V.   | GC/MS analysis of the chlorination reaction.....                                                                 | S17-S19 |
| VI.  | Deuterium labelled experiments.....                                                                              | S20-S23 |
| VII. | Copies of <sup>1</sup> H and <sup>13</sup> C NMR Spectra.....                                                    | S24     |

<sup>a</sup> Department of Chemistry, University of Cambridge, Cambridge, CB2 1EW, U.K.

<sup>b</sup> Neusentis Chemistry, Pfizer Worldwide Research and Development, The Portway Building, Granta Park, Cambridge, CB21 6GS, U.K.

## I. Material and Methods.

Unless stated otherwise, reactions were conducted in flame-dried glassware under an atmosphere of argon using anhydrous solvents. All commercially obtained reagents were used as received unless otherwise specified. TMEDA (tetramethylethylenediamine), *n*-BuLi (2.5 M in hexanes), DMF (N,N dimethylformamide, >99.8%), trimethylsilyl chloride (distilled from Mg), phenyl disulfide (CAS: 882-33-7), hexachloroethane (CAS: 67-72-1, recrystallised from EtOH), 1,2-dibromoethane (106-93-4), phenyl isocyanate (103-71-9), ethyl cyanofornate (CAS: 623-49-4), acetaldehyde (CAS: 75-07-0), 4-chlorobenzaldehyde (CAS: 104-88-1), *N*-benzylidenebenzenesulfonamide (CAS: 13909-34-7) were purchased from Sigma Aldrich. diphenylimine (CAS: 538-51-2) was purchased from Alfa Aesar. Analytical thin layer chromatography (TLC) was performed using silica gel 60 F254 precoated glassbacked plates and visualized by ultraviolet radiation (254 nm) and potassium permanganate. Flash column chromatography was performed using silica gel (particle size 40–63 nm) under air pressure. <sup>1</sup>H NMR spectra were recorded on Bruker spectrometers (at 400 MHz or 600 MHz) and are reported relative to deuterated solvent signals (CDCl<sub>3</sub>: 7.26 ppm, s). Data for <sup>1</sup>H NMR spectra are reported as follows: chemical shift (δ ppm), multiplicity (s = singlet, d = doublet, t = triplet, q = quartet, brs = broad singlet, td = triplet of doublets, dd = doublet of doublets, dt = doublet of triplets, qd = quartet of doublets and m = multiplet), coupling constant (Hz) and integration. <sup>13</sup>C NMR spectra were recorded on Bruker Spectrometers (at 100 or 150 MHz). Data for <sup>13</sup>C NMR spectra are reported in terms of chemical shift relative to deuterated solvent signals (<sup>13</sup>CDCl<sub>3</sub>: 77.16 ppm, t). HRMS was performed using electrospray ionization with time-of-flight mass analysis. HRMS signals are reported to 4 decimal places and are within ±5 ppm of theoretical values. Infrared spectra were recorded neat as thin films and only selected peaks are reported. Gas chromatography-mass spectrometry (GC/MS) were performed using a Shimadzu QP2010-SE fitted with a BPX5 column (10 m, 0.1 mm, 0.1 μm film) for FID analysis and a SHIM-5MS column (30 m, 0.25 mm, 0.25 μm film) for MS analysis.

## II. Synthesis of Starting Oxetane Pyridines and Spectroscopic Data for compounds 1, 5, 6 and 7

### General Procedure A: Synthesis of 3-(2-methyloxetan-2-yl)pyridine 1

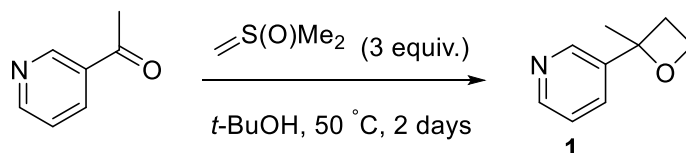

Trimethyloxosulfonium iodide (13.26 g, 60 mmol, 3 equiv.) and  $t\text{-BuOK}$  (6.73 g, 60 mmol, 3 equiv.) were mixed in 100 mL of  $t\text{-BuOH}$ . After 30 min stirring at  $50\text{ }^\circ\text{C}$ , 3-acetyl pyridine (2.42 g, 20 mmol, 1 equiv.) was added at  $50\text{ }^\circ\text{C}$  and the mixture was stirred 2 days at  $50\text{ }^\circ\text{C}$ , then, cooled to room temperature and  $t\text{-BuOH}$  was removed in vacuo. The resulting mixture was diluted in water (50 mL) and EtOAc (50 mL). Organic layer was separated and aqueous layer extracted with EtOAc (2x20 mL). Combined organic layer were dried over anhydrous  $\text{Na}_2\text{S}_2\text{O}_4$  and solvents were removed in vacuo.

**Purification:** To the resulting crude yellow oil was added 300 mL of  $n\text{-Hexanes}$  and the mixture was manually shaken until the formation of an orange precipitate (ca. 10 min). The  $n\text{-hexanes}$  layer containing the product was separated from the orange precipitate by filtration and  $n\text{-hexanes}$  was removed in vacuo. The crude oxetane pyridine was obtained as a yellow oil and showed a good purity according to NMR analysis. Flash column chromatography on silica gel ( $n\text{-hexanes}/\text{Et}_2\text{O}$ :20/80) afforded the compound as a yellow liquid (2.38 g, 16 mmol, 80% yield).

**R<sub>f</sub>** 0.28 (Petr. Ether/EtOAc = 20/80). Yellow liquid.

**$^1\text{H}$  NMR** ( $\text{CDCl}_3$ , 399.57 MHz)  $\delta$  8.63 (d,  $J$  = 2.0 Hz, 1H), 8.50 (dd,  $J$  = 4.8, 1.5 Hz, 1H), 7.80 – 7.67 (m, 1H), 7.28 (dd,  $J$  = 7.9, 4.9 Hz, 1H), 4.64 (dt,  $J$  = 8.6, 6.3 Hz, 1H), 4.53 (dt,  $J$  = 8.7, 6.6 Hz, 1H), 2.84 (ddd,  $J$  = 10.8, 8.7, 7.0 Hz, 1H), 2.73 (ddd,  $J$  = 10.8, 8.8, 6.6 Hz, 1H), 1.74 (s, 3H).

**$^{13}\text{C}$  NMR** ( $\text{CDCl}_3$ , 150.92 MHz)  $\delta$  148.20, 145.89, 143.17, 131.48, 123.09, 85.06, 64.74, 35.47, 30.32.

**FTIR** ( $\nu_{\text{max}}$   $\text{cm}^{-1}$ ) 2970, 2883, 1575, 1415, 1289, 1081, 956, 867, 808, 714.

**HRMS** Calcd for  $\text{C}_9\text{H}_{12}\text{NO}$ : 150.0913; Found ( $\text{M}+\text{H}$ ) $^+$ : 150.0912.

### 2-chloro-5-(2-methyloxetan-2-yl)pyridine (5)

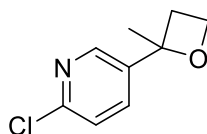

**5** was synthesized according to the general procedure A on a 2 mmol scale. The purification procedure was modified: after extraction with EtOAc, the resulting yellow oil was directly

purified by column chromatography over silica gel (Pet. Ether/EtOAc = 70/30). **5** was obtained as a yellow liquid (271 mg, 74% yield).

**Rf** 0.25 (Pet. Ether/EtOAc = 80/20). Yellow liquid.

**<sup>1</sup>H NMR** (600.13 MHz, CDCl<sub>3</sub>) δ 8.41 (d, *J* = 2.0 Hz, 1H), 7.72 (dd, *J* = 8.3, 2.6 Hz, 1H), 7.33 (dd, *J* = 8.3, 0.6 Hz, 1H), 4.65 (dt, *J* = 8.7, 6.3 Hz, 1H), 4.54 (ddd, *J* = 8.8, 6.9, 6.2 Hz, 1H), 2.86 (ddd, *J* = 10.9, 8.7, 6.9 Hz, 1H), 2.71 (ddd, *J* = 10.9, 8.8, 6.5 Hz, 1H), 1.75 (s, 3H).

**<sup>13</sup>C NMR** (100.61 MHz, CDCl<sub>3</sub>) δ 149.94, 145.89, 142.31, 134.83, 123.89, 84.82, 64.92, 35.65, 30.42.

**FTIR** (ν<sub>max</sub> cm<sup>-1</sup>) 2970, 2886, 1563, 1457, 1108, 1019, 956, 832.

**HRMS** Calcd for C<sub>9</sub>H<sub>11</sub>ClNO: 184.0538; Found (M+H)<sup>+</sup>: 184.0543.

### 2-methoxy-5-(2-methyloxetan-2-yl)pyridine (**6**)

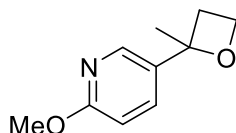

**6** was synthesized according to the general procedure A on a 2 mmol scale. The purification procedure was modified: after extraction with EtOAc, the resulting yellow oil was directly purified by column chromatography over silica gel (Pet. Ether/EtOAc = 70/30). **6** was obtained as a colourless liquid (240 mg, 67% yield).

**Rf** 0.4 (Pet. Ether/EtOAc = 80/20). Colourless liquid.

**<sup>1</sup>H NMR** (600 MHz, CDCl<sub>3</sub>) δ 8.20 (dd, *J* = 2.5, 0.4 Hz, 1H), 7.65 (dd, *J* = 8.6, 2.5 Hz, 1H), 6.75 (dd, *J* = 8.6, 0.6 Hz, 1H), 4.63 (dt, *J* = 8.7, 6.3 Hz, 1H), 4.54 (ddd, *J* = 8.8, 6.8, 6.2 Hz, 1H), 3.94 (s, 3H), 2.79 (ddd, *J* = 10.8, 8.7, 6.9 Hz, 1H), 2.72 (ddd, *J* = 10.8, 8.8, 6.6 Hz, 1H), 1.74 (s, 3H).

**<sup>13</sup>C NMR** (150.92 MHz, CDCl<sub>3</sub>) δ 163.35, 142.64, 136.13, 135.19, 110.53, 85.22, 85.18, 64.77, 53.52, 35.69, 30.24.

**FTIR** (ν<sub>max</sub> cm<sup>-1</sup>) 2970, 2882, 1606, 1489, 1375, 1280, 1023, 959.

**HRMS** Calcd for C<sub>10</sub>H<sub>14</sub>NO<sub>2</sub>: 180.1025; Found (M+H)<sup>+</sup>: 180.1033.

### 3-(2-ethyloxetan-2-yl)pyridine (**7**)

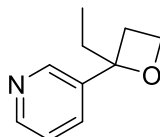

**7** was synthesized according to the general procedure A on a 2 mmol scale. **4** was obtained as a yellow liquid (230 mg, 70% yield).

**Rf** 0.32 (Pet. Ether/EtOAc = 20/80). Yellow liquid.

**<sup>1</sup>H NMR** (399.78 MHz, CDCl<sub>3</sub>) δ 8.57 (d, *J* = 1.8 Hz, 1H), 8.52 (dd, *J* = 4.8, 1.5 Hz, 1H), 7.73 – 7.64 (m, 1H), 7.29 (dd, *J* = 7.6, 5.0 Hz, 1H), 4.66 – 4.49 (m, 2H), 2.89 (ddd, *J* = 10.8, 8.8, 7.1 Hz, 1H), 2.68 (ddd, *J* = 10.8, 8.8, 6.4 Hz, 1H), 2.09 (dq, *J* = 14.6, 7.3 Hz, 1H), 1.95 (dq, *J* = 14.7, 7.4 Hz, 1H), 0.86 (t, *J* = 7.4 Hz, 3H).

**<sup>13</sup>C NMR** (CDCl<sub>3</sub>, 150.92 MHz) δ 148.17, 146.43, 142.01, 132.16, 123.07, 87.80, 65.27, 35.81, 33.34, 7.37.

**FTIR** (ν<sub>max</sub> cm<sup>-1</sup>) 2969, 2881, 1575, 1415, 1231, 960, 807.

**HRMS** Calcd for C<sub>10</sub>H<sub>14</sub>NO: 164.1075; Found (M+H)<sup>+</sup>: 164.1082.

### III. *O*-lithiation of Oxetane Pyridine Derivatives and Spectroscopic Data for compounds **2a-l**, **3a**, **4**, **8-10**

#### *General Procedure B*: Synthesis of 4-chloro-3-(2-methyloxetan-2-yl)pyridine **2a**

To a solution of 3-(2-methyloxetan-2-yl)pyridine **1** (1 mmol, 149 mg) and TMEDA (0.3 mmol, 35 mg) in diethyl ether (5 mL) under an argon atmosphere, at -78 °C (dry ice/acetone bath), was added *n*-BuLi over 2 min (0.6 mL, 1.5 mmol, 2.5 M in *n*-hexanes). The solution was stirred for 2 h at -78 °C. Then, C<sub>2</sub>Cl<sub>6</sub> (2 mmol, 473 mg) was added at -78 °C and the solution was then allowed to reach room temperature and stirred for 1 h 30 at room temperature. The reaction was quenched with H<sub>2</sub>O (10 mL), extracted with EtOAc (3x5 mL), dried over Na<sub>2</sub>SO<sub>4</sub> and solvents were removed in vacuo. Flash column chromatography on silica gel (Petr. Ether/EtOAc: 70/30) afforded the expected compound as a yellow oil (155 mg, 85% yield).

#### 4-chloro-3-(2-methyloxetan-2-yl)pyridine (**2a**)

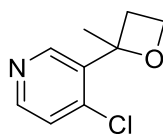

**R<sub>f</sub>** 0.26 (Petr. Ether/EtOAc = 70/30). Yellow oil.

**<sup>1</sup>H NMR** (600.13 MHz, CDCl<sub>3</sub>) δ 8.85 (s, 1H), 8.44 (d, *J* = 5.3 Hz, 1H), 7.27 (d, *J* = 5.3 Hz, 1H), 4.68 (ddd, *J* = 8.1, 7.2, 6.0 Hz, 1H), 4.51 (ddd, *J* = 8.3, 7.3, 6.0 Hz, 1H), 2.96 – 2.86 (m, 2H), 1.81 (s, 3H).

**<sup>13</sup>C NMR** (100.47 MHz, CDCl<sub>3</sub>) δ 149.20, 147.82, 140.14, 139.52, 124.60, 85.37, 65.45, 34.51, 28.33.

**FTIR** (ν<sub>max</sub> cm<sup>-1</sup>) 2970, 2885, 1552, 1464, 1397, 1072, 963, 823.

**HRMS** (ESI<sup>+</sup>) Calculated for C<sub>9</sub>H<sub>11</sub>ClNO: 184.0529; Found (M+H)<sup>+</sup>: 184.0536.

### 2-chloro-3-(2-methyloxetan-2-yl)pyridine (3a)

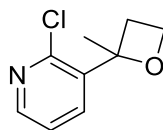

Isolated as a by-product (7 mg, 4% yield) by column chromatography over silica gel (Petr. Ether/EtOAc = 80/20) when general procedure B was applied with 1.5 equivalent of TMEDA.

**R<sub>f</sub>** 0.50 (Petr. Ether/EtOAc = 70/30). Yellow oil.

**<sup>1</sup>H NMR** (399.57 MHz, CDCl<sub>3</sub>) δ 8.31 (dd, *J* = 4.7, 1.8 Hz, 1H), 8.00 (dd, *J* = 7.6, 1.8 Hz, 1H), 7.29 (dd, *J* = 7.6, 4.8 Hz, 1H), 4.66 (dd, *J* = 14.4, 6.9 Hz, 1H), 4.44 (dt, *J* = 8.3, 6.9 Hz, 1H), 3.07 – 2.84 (m, 2H), 1.80 (s, 3H).

**<sup>13</sup>C NMR** (100.48 MHz, CDCl<sub>3</sub>) δ 148.27, 146.99, 141.76, 135.27, 122.76, 85.44, 65.38, 34.50, 28.24.

**FTIR** (ν<sub>max</sub> cm<sup>-1</sup>) 2964, 2885, 1563, 1395, 1048, 966, 807.

**HRMS** (ESI+) Calculated for C<sub>9</sub>H<sub>11</sub>ClNO: 184.0529; Found (M+H)<sup>+</sup>: 184.0531.

### 3-(pyridin-3-yl)but-3-en-1-ol (4)

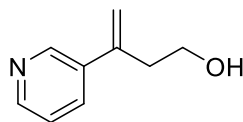

Isolated as a degradation product (22 mg, 15% yield) by column chromatography over silica gel (EtOAc) when general procedure B was applied at 0 °C without TMEDA.

**R<sub>f</sub>** 0.14 (EtOAc). Yellow oil.

**<sup>1</sup>H NMR** (600.13 MHz, CDCl<sub>3</sub>) δ 8.66 (d, *J* = 1.9 Hz, 1H), 8.50 (dd, *J* = 4.7, 1.3 Hz, 1H), 7.73 – 7.69 (m, 1H), 7.29 – 7.23 (m, 1H), 5.45 (s, 1H), 5.27 (d, *J* = 1.0 Hz, 1H), 3.75 (t, *J* = 6.5 Hz, 2H), 2.79 (td, *J* = 6.5, 1.0 Hz, 2H).

**<sup>13</sup>C NMR** (150.92 MHz, CDCl<sub>3</sub>) δ 148.86, 147.63, 142.22, 136.27, 133.58, 123.38, 116.35, 60.88, 38.35.

**FTIR** (ν<sub>max</sub> cm<sup>-1</sup>) 3265, 2873, 1627, 1414, 1042, 1022, 904, 815, 716.

**HRMS** (ESI+) Calculated for C<sub>9</sub>H<sub>12</sub>NO: 150.0919; Found (M+H)<sup>+</sup>: 150.0921.

### 3-(2-methyloxetan-2-yl)-4-(trimethylsilyl)pyridine (2b)

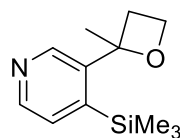

Synthesized according to the general procedure B with trimethylsilyl chloride (3 mmol, 326 mg, 3 eq.) as electrophile and isolated as a yellow oil (172 mg, 78% yield) by column chromatography over silica gel (Petr. ether/EtOAc = 70/30).

**R<sub>f</sub>** 0.30 (Petr. ether/EtOAc = 70/30). Yellow oil.

**<sup>1</sup>H NMR** (CDCl<sub>3</sub>, 600.13 MHz) δ 8.41 (d, *J* = 4.9 Hz, 1H), 8.30 (s, 1H), 7.46 (d, *J* = 4.9 Hz, 1H), 4.52 (ddd, *J* = 9.4, 8.7, 5.9 Hz, 1H), 4.43 (td, *J* = 8.1, 6.3 Hz, 1H), 3.01 (ddd, *J* = 16.6, 9.8, 8.5 Hz, 1H), 2.77 (ddd, *J* = 10.7, 8.6, 5.8 Hz, 1H), 1.72 (s, 3H), 0.30 (s, 9H).

**<sup>13</sup>C NMR** (CDCl<sub>3</sub>, 150.90 MHz) δ 149.17, 146.79, 146.18, 145.09, 129.58, 87.24, 64.64, 37.01, 32.56, 1.17.

**FTIR** (ν<sub>max</sub> cm<sup>-1</sup>) 2954, 2885, 1578, 1243, 967, 830, 742.

**HRMS** (ESI+) Calculated for C<sub>12</sub>H<sub>20</sub>NOSi: 222.1341; Found (M+H)<sup>+</sup>: 222.1332.

### 3-(2-methyloxetan-2-yl)-4-(phenylthio)pyridine (2c)

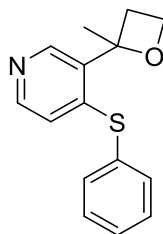

Synthesized according to the general procedure B with phenyl disulfide (2 mmol, 436 mg, 2 eq.) as electrophile and isolated as a yellow oil (234 mg, 91% yield) by column chromatography over silica gel (Petr. ether/EtOAc = 60/40).

**R<sub>f</sub>** 0.26 (Petr. ether/EtOAc = 60/40). Yellow oil.

**<sup>1</sup>H NMR** (CDCl<sub>3</sub>, 399.57 MHz) δ 8.66 (s, 1H), 8.19 (d, *J* = 5.4 Hz, 1H), 7.55 – 7.33 (m, 5H), 6.63 (d, *J* = 5.4 Hz, 1H), 4.69 (dt, *J* = 8.3, 6.5 Hz, 1H), 4.52 (dt, *J* = 8.9, 6.3 Hz, 1H), 3.06 (ddd, *J* = 11.0, 9.0, 6.9 Hz, 1H), 2.90 (ddd, *J* = 11.1, 8.4, 6.7 Hz, 1H), 1.88 (s, 3H).

**<sup>13</sup>C NMR** (CDCl<sub>3</sub>, 100.61 MHz) δ 148.16, 145.82, 145.15, 138.98, 135.15, 130.07, 129.97, 129.60, 121.08, 86.12, 65.63, 34.69, 28.63.

**FTIR** (ν<sub>max</sub> cm<sup>-1</sup>) 2967, 2882, 1568, 1439, 1077, 963, 745.

**HRMS** (ESI+) Calculated for C<sub>15</sub>H<sub>16</sub>NOS: 258.0947; Found (M+H)<sup>+</sup>: 258.0958.

#### 4-bromo-3-(2-methyloxetan-2-yl)pyridine (2d)

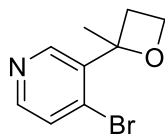

Synthesized according to the general procedure B with 1,2 dibromoethane (3 mmol, 563 mg, 3 eq.) as electrophile and isolated as a yellow oil (187 mg, 82% yield) by column chromatography over silica gel (Petr. ether/EtOAc = 70/30).

**Rf** 0.29 (Petr. ether/EtOAc = 70/30). Colorless oil.

**<sup>1</sup>H NMR** (CDCl<sub>3</sub>, 399.57 MHz) δ 8.80 (s, 1H), 8.28 (d, *J* = 5.2 Hz, 1H), 7.43 (d, *J* = 5.2 Hz, 1H), 4.64 (dd, *J* = 14.2, 7.0 Hz, 1H), 4.45 (dt, *J* = 13.3, 6.7 Hz, 1H), 2.94 – 2.81 (m, 2H), 1.79 (s, 3H).

**<sup>13</sup>C NMR** (CDCl<sub>3</sub>, 100.61 MHz) δ 148.99, 147.81, 141.86, 129.20, 128.10, 86.57, 65.55, 34.89, 28.57.

**FTIR** (ν<sub>max</sub> cm<sup>-1</sup>) 2969, 2885, 1544, 1393, 1257, 1061, 962, 821.

**HRMS** (ESI+) Calculated for C<sub>9</sub>H<sub>11</sub>BrNO: 228.0032; Found (M+H)<sup>+</sup>: 228.0022.

#### 4-iodo-3-(2-methyloxetan-2-yl)pyridine (2e)

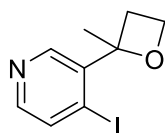

Synthesized according to the general procedure B with iodine (2 mmol, 507 mg, 2 eq.) as electrophile and isolated as beige solid (217 mg, 79% yield) by column chromatography over silica gel (Petr. ether/EtOAc = 70/30).

*On a gram-scale:* Synthesized according to the general procedure B with **1** (16.7 mmol, 2.5 g, 1 eq.), *n*-BuLi (23.4 mmol, 9.35 mL, 1.4 eq.), TMEDA (5.01 mmol, 582 mg, 0.3 eq.), iodine (41.7 mmol, 5.3 g, 2.5 eq.) in methyl *tert*-butyl ether (90 mL). *N*-BuLi was added over 20 min to avoid high variation in temperature. Column chromatography over silica gel (Petr. ether/EtOAc = 70/30) followed by a recrystallization from petroleum ether/ethyl acetate (99/1) afforded **2e** as a beige powder (3.10 g, 67% yield).

**Rf** 0.28 (Petr. ether/EtOAc = 70/30). Beige solid. **Mp**: 85 °C (Petr. Ether/EtOAc : 99/1).

**<sup>1</sup>H NMR** (CDCl<sub>3</sub>, 600.13 MHz) δ 8.78 (s, 1H), 8.08 (d, *J* = 5.1 Hz, 1H), 7.77 (d, *J* = 5.1 Hz, 1H), 4.66 (dt, *J* = 8.1, 6.7 Hz, 1H), 4.46 (dt, *J* = 8.8, 6.4 Hz, 1H), 3.03 – 2.90 (m, 2H), 1.84 (s, 3H).



**<sup>13</sup>C NMR** (150.92 MHz, CDCl<sub>3</sub>) δ 148.52, 147.11, 145.04, 135.10, 103.32, 88.05, 65.47, 35.13, 28.70.

**FTIR** (ν<sub>max</sub> cm<sup>-1</sup>) 2962, 2888, 1560, 1392, 1226, 1052, 960, 818, 661.

**HRMS** (ESI+) Calculated for C<sub>9</sub>H<sub>10</sub>INO: 275.9807; Found (M+H)<sup>+</sup>: 275.9900.

### 3-(2-methyloxetan-2-yl)isonicotinaldehyde (2f)

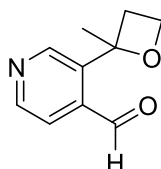

Synthesized according to the general procedure B with dimethylformamide (3 mmol, 219 mg, 3 eq.) as electrophile and isolated as a yellow oil (138 mg, 78% yield) by column chromatography over silica gel (Petr. ether/EtOAc = 50/50).

**R<sub>f</sub>** 0.26 (Petr. Ether/EtOAc = 50/50). Yellow oil, becoming solid after 1 night in the fridge.

**<sup>1</sup>H NMR** (CDCl<sub>3</sub>, 600.13 MHz) δ 10.31 (s, 1H), 8.87 (s, 1H), 8.76 (d, *J* = 4.9 Hz, 1H), 7.63 (dd, *J* = 4.9, 0.5 Hz, 1H), 4.77 – 4.56 (m, 1H), 4.54 – 4.39 (m, 1H), 3.04 (ddd, *J* = 11.3, 8.6, 6.7 Hz, 1H), 2.88 (ddd, *J* = 11.3, 9.0, 6.8 Hz, 1H), 1.84 (s, 3H).

**<sup>13</sup>C NMR** (CDCl<sub>3</sub>, 150.92 MHz) δ 191.97, 149.81, 148.09, 142.44, 137.84, 122.72, 86.24, 65.64, 36.30, 31.66.

**FTIR** (ν<sub>max</sub> cm<sup>-1</sup>) 2969, 2887, 1703, 1402, 1265, 964, 874, 837.

**HRMS** (ESI+) Calculated for C<sub>10</sub>H<sub>12</sub>NO<sub>2</sub>: 178.0789; Found (M+H)<sup>+</sup>: 178.0875.

### 3-(2-methyloxetan-2-yl)-N-phenylisonicotinamide (2g)

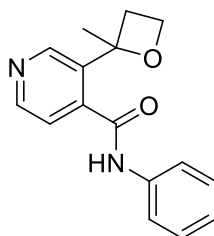

Synthesized according to the general procedure B with phenyl isocyanate (2 mmol, 238 mg, 3 eq.) as electrophile and isolated as a white solid (214 mg, 80% yield) by column chromatography over silica gel (EtOAc).

**R<sub>f</sub>** 0.26 (EtOAc). White solid. **Mp** : 192 °C (EtOAc)

**<sup>1</sup>H NMR** (600.13 MHz, CD<sub>2</sub>Cl<sub>2</sub>) δ 8.74 (s, 1H), 8.57 (d, *J* = 4.4 Hz, 1H), 8.48 (s, 1H), 7.60 (d, *J* = 8.0 Hz, 2H), 7.43 (d, *J* = 4.8 Hz, 1H), 7.37 (t, *J* = 7.8 Hz, 2H), 7.17 (t, *J* = 7.4 Hz, 1H), 4.70 – 4.55 (m, 1H), 4.46 (dt, *J* = 9.0, 6.2 Hz, 1H), 3.05 (ddd, *J* = 11.0, 9.0, 7.3 Hz, 1H), 2.84 (ddd, *J* = 11.3, 8.4, 6.5 Hz, 1H), 1.84 (s, 3H).

**<sup>13</sup>C NMR** (CD<sub>2</sub>Cl<sub>2</sub>, 150.92 MHz) δ 166.31, 149.37, 148.10, 141.16, 140.06, 138.40, 129.52, 125.25, 122.02, 120.60, 86.57, 66.02, 35.63, 30.79.

**FTIR** (ν<sub>max</sub> cm<sup>-1</sup>) 3285, 1657, 1556, 1442, 1335, 1181, 955, 860, 752.

**HRMS** (ESI+) Calculated for C<sub>16</sub>H<sub>17</sub>N<sub>2</sub>O<sub>2</sub>: 269.1159; Found (M+H)<sup>+</sup>: 269.1160.

### Ethyl 3-(2-methyloxetan-2-yl)isonicotinate (2h)

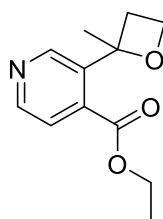

Synthesized according to the general procedure B with ethyl cyanoformate (2 mmol, 198 mg, 2 eq.) as electrophile and isolated as a yellow oil (170 mg, 77% yield) by column chromatography over silica gel (Petr. ether/EtOAc = 50/50).

**R<sub>f</sub>** 0.3 (Petr. ether/EtOAc = 50/50). Yellow oil.

**<sup>1</sup>H NMR** (600.13 MHz, CDCl<sub>3</sub>) δ 8.93 (s, 1H), 8.63 (d, *J* = 5.0 Hz, 1H), 7.56 (d, *J* = 5.0 Hz, 1H), 4.61 (dt, *J* = 8.6, 6.3 Hz, 1H), 4.44 (ddd, *J* = 8.9, 6.8, 6.1 Hz, 1H), 4.36 (q, *J* = 7.2 Hz, 2H), 2.96 (ddd, *J* = 11.5, 8.6, 6.9 Hz, 1H), 2.79 (ddd, *J* = 11.5, 8.9, 6.6 Hz, 1H), 1.84 (s, 3H), 1.39 (t, *J* = 7.2 Hz, 3H).

**<sup>13</sup>C NMR** (CDCl<sub>3</sub>, 150.92 MHz) δ 166.75, 148.84, 148.32, 141.96, 135.07, 122.66, 86.33, 65.31, 61.97, 36.38, 30.54, 14.24.

**FTIR** (ν<sub>max</sub> cm<sup>-1</sup>) 2976, 2885, 1726, 1366, 1258, 1082, 965, 866, 718.

**HRMS** (ESI+) Calculated for C<sub>12</sub>H<sub>16</sub>NO<sub>3</sub>: 222.1130; Found (M+H)<sup>+</sup>: 222.1132.

### 1-(3-(2-methyloxetan-2-yl)pyridin-4-yl)ethan-1-ol (2i)

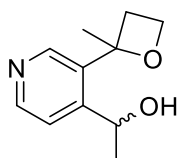

Synthesized according to the general procedure B with acetaldehyde (3 mmol, 220 mg, 5 eq.) as electrophile and isolated as a yellow oil (135 mg, 70% yield) by column chromatography over silica gel (Petr. ether/EtOAc = 60/40) as a 1/1 mixture of diastereomers.

**R<sub>f</sub>** 0.14 (EtOAc). Yellow oil.

**<sup>1</sup>H NMR** (CDCl<sub>3</sub>, 600.13 MHz) δ 8.32 (d, *J* = 3.5 Hz, 1H), 8.32 (d, *J* = 2.2 Hz, 1H), 8.31 (s, 1H), 8.23 (s, 1H), 7.46 (d, *J* = 5.2 Hz, 1H), 7.34 (d, *J* = 5.2 Hz, 1H), 4.93 – 4.89 (m, 2H), 4.65 (ddd, *J* = 8.3, 7.3, 6.1 Hz, 1H), 4.57 (dt, *J* = 8.5, 6.5 Hz, 1H), 4.46 (dt, *J* = 9.2, 6.0 Hz, 1H), 4.38 (dt, *J* = 9.0, 6.2 Hz, 1H), 2.97 (ddd, *J* = 10.7, 9.3, 7.4 Hz, 1H), 2.90 (ddd, *J* = 10.7, 9.0, 6.9 Hz, 1H), 2.85 – 2.79 (m, 1H), 1.73 (s, 3H), 1.67 (s, 3H), 1.45 (d, *J* = 6.5 Hz, 3H), 1.42 (d, *J* = 6.3 Hz, 3H).

**<sup>13</sup>C NMR** (CDCl<sub>3</sub>, 150.92 MHz) δ 151.80, 150.56, 148.55, 148.40, 146.19, 145.88, 139.83, 139.16, 121.35, 121.08, 87.17, 86.15, 65.74, 65.31, 65.08, 64.80, 35.95, 35.77, 31.67, 31.48, 24.95, 22.52.

**FTIR** (ν<sub>max</sub> cm<sup>-1</sup>) 3232, 2973, 1597, 1407, 1373, 1084, 964, 907, 840, 727.

**HRMS** (ESI+) Calculated for C<sub>11</sub>H<sub>15</sub>NO<sub>2</sub>: 194.1208; Found (M+H)<sup>+</sup>: 194.1216.

#### (4-chlorophenyl)(3-(2-methyloxetan-2-yl)pyridin-4-yl)methanol (**2j**)

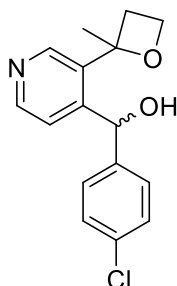

Synthesized according to the general procedure B with 4-chlorobenzaldehyde (2 mmol, 281 mg, 2 eq.) as electrophile and isolated as a white solid (261 mg, 90% yield) by column chromatography over silica gel (Petr. ether/EtOAc = 20/80) as a 1/1 mixture of diastereomers.

**R<sub>f</sub>** 0.37 (Petr. ether/EtOAc = 20/80). White solid. **Mp** : 145 °C (EtOH).

**<sup>1</sup>H NMR** (CD<sub>2</sub>Cl<sub>2</sub>, 600.13 MHz) δ 8.36 (d, *J* = 5.1 Hz, 1H), 8.32 (s, 1H), 8.30 (d, *J* = 5.1 Hz, 1H), 8.27 (s, 1H), 7.36 – 7.26 (m, 8H), 7.25 (d, *J* = 5.1 Hz, 1H), 6.87 (d, *J* = 5.1 Hz, 1H), 6.02 (s, 1H), 6.01 (s, 1H), 4.71 (ddd, *J* = 8.3, 7.5, 6.1 Hz, 1H), 4.65 – 4.58 (m, 1H), 4.48 (dt, *J* = 9.4, 6.0 Hz, 1H), 4.44 (dt, *J* = 9.2, 6.1 Hz, 1H), 3.16 – 3.01 (m, 2H), 2.89 (tdd, *J* = 11.0, 8.5, 6.1 Hz, 2H), 1.85 (s, 3H), 1.58 (s, 3H).

**$^{13}\text{C}$  NMR** ( $\text{CD}_2\text{Cl}_2$ , 150.92 MHz)  $\delta$  149.34, 149.28, 149.02, 148.81, 147.39, 147.16, 142.49, 141.28, 140.83, 140.72, 133.44, 133.33, 128.80, 128.78, 128.67, 128.60, 123.95, 123.50, 88.20, 87.22, 71.39, 70.78, 66.63, 66.00, 36.44, 36.43, 31.91, 31.90.

**FTIR** ( $\nu_{\text{max}}$   $\text{cm}^{-1}$ ) 3150, 2966, 1597, 1486, 1087, 1043, 967, 798.

**HRMS** (ESI+) Calculated for  $\text{C}_{16}\text{H}_{17}\text{ClNO}_2$ : 290.0961; Found ( $\text{M}+\text{H}$ ) $^+$ : 290.0955.

**N-((3-(2-methyloxetan-2-yl)pyridin-4-yl)(phenyl)methyl)benzenesulfonamide (2k)**

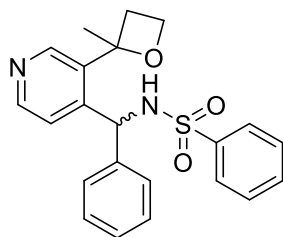

Synthesized according to the general procedure B by using *N*-benzylidenebenzenesulfonamide (3 mmol, 735 mg, 3 eq.) as electrophile and isolated as a white (197 mg, 50% yield) by column chromatography over silica gel (EtOAc) as a mixture of diastereomers (dr 1:0.6).

**R<sub>f</sub>** 0.47 (EtOAc). White solid. **Mp** : 200 °C(EtOAc).

**$^1\text{H}$  NMR** ( $\text{CDCl}_3$ , 600.13 MHz)  $\delta$  8.39 (d,  $J$  = 5.1 Hz, 1H), 8.33 (d,  $J$  = 4.4 Hz, 1H), 8.27 (s, 1H), 7.76 (d,  $J$  = 7.8 Hz, 2H), 7.70 (d,  $J$  = 7.8 Hz, 1H), 7.54 – 7.45 (m, 1H), 7.43 – 7.33 (m, 4H), 7.20 (dd,  $J$  = 8.8, 5.0 Hz, 5H), 7.01 (dd,  $J$  = 6.6, 2.6 Hz, 1H), 6.91 (dd,  $J$  = 6.6, 2.7 Hz, 2H), 6.21 (d,  $J$  = 7.4 Hz, 1H), 6.16 (d,  $J$  = 5.8 Hz, 0.5H), 5.94 (d,  $J$  = 7.4 Hz, 0.5H), 5.84 (d,  $J$  = 7.3 Hz, 1H), 4.55 (dd,  $J$  = 14.7, 6.7 Hz, 0.5H), 4.46 (dd,  $J$  = 14.4, 6.9 Hz, 1H), 4.30 (dt,  $J$  = 9.1, 6.1 Hz, 0.5H), 4.07 (dt,  $J$  = 8.9, 6.2 Hz, 1H), 3.06 – 2.93 (m, 0.5H), 2.85 (ddd,  $J$  = 10.8, 8.4, 6.3 Hz, 0.5H), 2.78 – 2.65 (m, 2H), 1.47 (s, 3H), 1.39 (s, 1.5H).

**$^{13}\text{C}$  NMR** ( $\text{CD}_2\text{Cl}_2$ , 150.92 MHz)  $\delta$  148.40, 148.17, 148.10, 147.79, 144.97, 144.73, 140.80, 140.63, 140.37, 140.23, 140.11, 139.51, 132.80, 132.76, 129.03, 129.00, 128.81, 128.66, 128.02, 127.98, 127.59, 127.55, 127.22, 127.05, 123.96, 123.70, 87.10, 86.90, 65.49, 65.18, 57.97, 36.57, 36.43, 31.10, 30.96.

**FTIR** ( $\nu_{\text{max}}$   $\text{cm}^{-1}$ ) 3054, 1592, 1330, 1156, 1050, 960, 859.

**HRMS** (ESI+) Calculated for  $\text{C}_{22}\text{H}_{23}\text{N}_2\text{O}_3\text{S}$ : 395.1451; Found ( $\text{M}+\text{H}$ ) $^+$ : 395.1453.

**N-((3-(2-methyloxetan-2-yl)pyridin-4-yl)(phenyl)methyl)aniline (2l)**

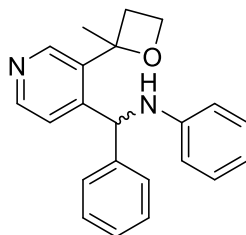

Synthesized according to the general procedure B by using diphenyl imine (2 mmol, 362 mg, 3 eq.) as electrophile and isolated as a white solid (254 mg, 77% yield) by column chromatography over silica gel (Petr. ether/EtOAc = 40/60) as a mixture of diastereomers (dr 1:0.2).

**R<sub>f</sub>** 0.3 (Petr. ether/EtOAc = 40/60). White solid. **M<sub>p</sub>** : 178 °C (EtOAc/Pet. Ether : 95/5).

**<sup>1</sup>H NMR** (CD<sub>2</sub>Cl<sub>2</sub>, 600.13 MHz) δ 8.57 (s, 1H), 8.54 (s, 0.17H), 8.43 (d, *J* = 5.2 Hz, 0.17H), 8.42 (d, *J* = 5.1 Hz, 1H), 7.39 (d, *J* = 7.4 Hz, 2H), 7.37 (d, *J* = 5.2 Hz, 0.17H), 7.37 – 7.31 (m, 2H), 7.31 – 7.24 (m, 1.5H), 7.15 (d, *J* = 5.1 Hz, 1H), 7.14 – 7.05 (m, 2.18H), 6.68 (t, *J* = 7.3 Hz, 1H), 6.60 (d, *J* = 0.8 Hz, 0.36H), 6.53 (d, *J* = 7.7 Hz, 2H), 6.09 (d, *J* = 4.6 Hz, 0.18H), 5.97 (d, *J* = 5.5 Hz, 1H), 4.70 – 4.61 (m, 1.18H), 4.53 (dt, *J* = 9.2, 6.0 Hz, 0.18H), 4.42 (dt, *J* = 9.2, 6.0 Hz, 1H), 4.36 (d, *J* = 4.8 Hz, 0.18H), 4.30 (d, *J* = 5.4 Hz, 1H), 3.18 (ddd, *J* = 10.8, 9.2, 7.2 Hz, 1H), 3.08 (ddd, *J* = 10.5, 9.2, 7.2 Hz, 0.18H), 2.93 (ddd, *J* = 10.7, 8.4, 6.2 Hz, 0.18H), 2.84 (ddd, *J* = 10.9, 8.4, 6.1 Hz, 1H), 1.80 (s, 3H), 1.53 (s, 0.54H).

**<sup>13</sup>C NMR** (CD<sub>2</sub>Cl<sub>2</sub>, 150.92 MHz) δ 149.56, 149.20, 147.99, 147.85, 147.68, 147.34, 147.23, 142.34, 142.17, 141.02, 140.76, 129.73, 129.68, 129.23, 129.14, 128.62, 128.22, 127.90, 127.88, 123.47, 123.02, 118.34, 118.25, 113.79, 113.72, 87.37, 86.74, 65.86, 65.70, 57.54, 57.09, 37.03, 35.65, 31.89, 31.00.

**FTIR** (ν<sub>max</sub> cm<sup>-1</sup>) 3315, 1602, 1588, 1498, 1318, 947, 747.

**HRMS** (ESI+) Calculated for C<sub>22</sub>H<sub>23</sub>N<sub>2</sub>O<sub>2</sub>: 331.1802; Found (M+H)<sup>+</sup>: 331.1816.

**2-chloro-4-iodo-5-(2-methyloxetan-2-yl)pyridine (8)**

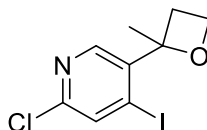

Synthesized according to the general procedure B with iodine (2 mmol, 507 mg, 2 eq.) and isolated as a yellow solid (188 mg, 61% yield) by column chromatography over silica gel (Petr. ether/EtOAc = 90/10).

**Rf** 0.35 (Petr. ether/EtOAc = 90/10). Yellow solid.

**<sup>1</sup>H NMR** (CDCl<sub>3</sub>, 600.13 MHz) δ 8.54 (s, 1H), 7.81 (s, 1H), 4.64 (dt, *J* = 8.4, 6.4 Hz, 1H), 4.44 (dt, *J* = 9.0, 6.4 Hz, 1H), 2.96 (ddd, *J* = 11.4, 8.4, 6.7 Hz, 1H), 2.90 (ddd, *J* = 11.4, 9.0, 6.8 Hz, 1H), 1.81 (s, 3H).

**<sup>13</sup>C NMR** (CDCl<sub>3</sub>, 150.90 MHz) δ 149.88, 146.63, 143.90, 134.55, 104.67, 87.63, 65.43, 34.96, 28.61.

**FTIR** (ν<sub>max</sub> cm<sup>-1</sup>) 2971, 2886, 1526, 1439, 1263, 1111, 1089, 958, 872, 761.

**HRMS** (ESI+) Calculated for C<sub>9</sub>H<sub>10</sub>ClINO: 309.9512; Found (M+H)<sup>+</sup>: 309.9521.

#### 4-iodo-2-methoxy-5-(2-methyloxetan-2-yl)pyridine (9)

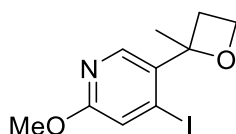

Synthesized according to the general procedure B with iodine (2 mmol, 507 mg, 2 eq.) and Isolated as a yellow solid (234 mg, 77% yield) by column chromatography over silica gel (Petr. ether/EtOAc = 90/10).

**Rf** 0.4 (Petr. ether/EtOAc = 90/10). Yellow oil.

**<sup>1</sup>H NMR** (CDCl<sub>3</sub>, 600.13 MHz) δ 8.32 (s, 1H), 7.27 (s, 1H), 4.61 (ddd, *J* = 8.4, 6.7, 6.0 Hz, 1H), 4.43 (ddd, *J* = 8.9, 6.7, 6.0 Hz, 1H), 3.90 (s, 3H), 2.93 – 2.83 (m, 2H), 1.80 (s, 3H).

**<sup>13</sup>C NMR** (CDCl<sub>3</sub>, 150.90 MHz) δ 163.11, 143.50, 137.22, 121.95, 104.47, 87.89, 65.38, 53.84, 35.17, 29.35.

**FTIR** (ν<sub>max</sub> cm<sup>-1</sup>) 2968, 2882, 1573, 1470, 1345, 1278, 1213, 1017, 966, 852.

**HRMS** (ESI+) Calculated for C<sub>10</sub>H<sub>13</sub>INO<sub>2</sub>: 305.9980; Found (M+H)<sup>+</sup>: 305.9968.

#### 3-(2-ethyloxetan-2-yl)isonicotinaldehyde (10)

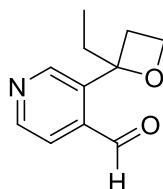

Synthesized according to the general procedure B with dimethylformamide (3 mmol, 219 mg, 3 eq.) as electrophile and isolated as a yellow oil (134 mg, 70% yield) by column chromatography over silica gel (Petr. ether/EtOAc = 40/60).

**Rf** 0.42 (Petr. ether/EtOAc = 40/60). Yellow oil.

**<sup>1</sup>H NMR** (CDCl<sub>3</sub>, 600.13 MHz) δ 10.33 (s, 1H), 8.76 (s, 1H), 8.74 (d, *J* = 4.9 Hz, 1H), 7.64 (dd, *J* = 5.0, 0.6 Hz, 1H), 4.61 (dt, *J* = 8.7, 6.4 Hz, 1H), 4.55 – 4.50 (m, 1H), 3.07 (ddd, *J* = 11.3, 8.7, 6.7 Hz, 1H), 2.84 (ddd, *J* = 11.3, 9.1, 6.7 Hz, 1H), 2.17 (dq, *J* = 14.7, 7.4 Hz, 1H), 2.01 (dq, *J* = 14.8, 7.4 Hz, 1H), 0.94 (t, *J* = 7.4 Hz, 3H).

**<sup>13</sup>C NMR** (CDCl<sub>3</sub>, 150.90 MHz) δ 192.16, 149.65, 148.74, 141.47, 138.56, 122.11, 89.06, 66.06, 36.60, 34.19, 7.77.

**FTIR** (ν<sub>max</sub> cm<sup>-1</sup>) 2969, 2884, 1700, 1461, 1220, 963, 831, 729.

**HRMS** (ESI+) Calculated for C<sub>11</sub>H<sub>14</sub>NO<sub>2</sub>: 192.1025; Found (M+H)<sup>+</sup>: 192.1031.

#### IV. Suzuki coupling of iodide 2e.

*General procedure C:* To **2e** (0.5 mmol, 137.5 mg, 1eq.), K<sub>2</sub>CO<sub>3</sub> (1.5 mmol, 207 mg, 3 eq.), tetrakis(triphenylphosphine)palladium (0.025 mmol, 29 mg, 5 mol %) and arylboronic acid (0.75 mmol, 1.5 eq.) was added toluene (4 mL) and H<sub>2</sub>O (2 mL), the mixture was then heated at 120 °C for 1 hour with a vigorous stirring. The mixture was cooled to room temperature and mixed with ethyl acetate (10 mL) and NaHCO<sub>3(aq)</sub> (10 mL), the organic layer was separated and the aqueous layer extracted with ethyl acetate (2x10mL). Organic layers were combined, dried over Na<sub>2</sub>SO<sub>4</sub> and solvent were removed in vacuo. The resulting crude mixture was purified by column chromatography over silica gel (petroleum ether/ethyl acetate) to afford the expected compound.

##### 4-(4-chlorophenyl)-3-(2-methyloxetan-2-yl)pyridine (**11**)

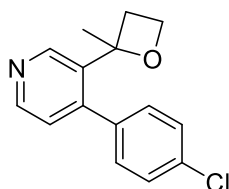

Synthesized according to the general procedure C with 4-chlorophenylboronic acid (0.75, 117 mg, 1.5 eq.) and isolated as a slightly yellow solid (106 mg, 82% yield) by column chromatography over silica gel (Petr. ether/EtOAc = 30/70).

**R<sub>f</sub>** 0.34 (Petr. ether/EtOAc = 30/70). Slightly yellow solid.

**<sup>1</sup>H NMR** (CDCl<sub>3</sub>, 600.13 MHz) δ 8.89 (s, 1H), 8.54 (d, *J* = 4.9 Hz, 1H), 7.39 (d, *J* = 8.5 Hz, 2H), 7.17 (d, *J* = 8.5 Hz, 2H), 7.04 (d, *J* = 4.9 Hz, 1H), 4.57 (td, *J* = 7.7, 6.1 Hz, 1H), 4.38 (dt, *J* = 9.3, 5.9 Hz, 1H), 2.74 (ddd, *J* = 10.9, 9.2, 7.6 Hz, 1H), 2.34 (ddd, *J* = 11.0, 8.2, 5.9 Hz, 1H), 1.64 (s, 3H).

**<sup>13</sup>C NMR** (CDCl<sub>3</sub>, 150.92 MHz) δ 148.27, 147.47, 145.20, 140.55, 138.23, 134.33, 130.08, 128.55, 125.22, 86.00, 65.15, 36.05, 31.04.

**FTIR** (ν<sub>max</sub> cm<sup>-1</sup>) 2972, 2883, 1598, 1473, 1403, 1090, 965, 826.

**HRMS** (ESI+) Calculated for C<sub>15</sub>H<sub>15</sub>ClNO: 260.0856; Found (M+H)<sup>+</sup>: 260.0866.

#### 4-(4-methoxyphenyl)-3-(2-methyloxetan-2-yl)pyridine (12)

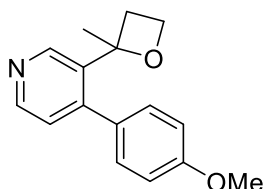

Synthesized according to the general procedure C with 4-methoxyphenylboronic acid (0.75, 114 mg, 1.5 eq.) and isolated as a yellow oil (108 mg, 85% yield) by column chromatography over silica gel (Petr. ether/EtOAc = 20/80).

**R<sub>f</sub>** 0.37 (Petr. ether/EtOAc = 20/80). Colourless oil.

**<sup>1</sup>H NMR** (CDCl<sub>3</sub>, 600.13 MHz) δ 8.89 (s, 1H), 8.51 (d, *J* = 5.0 Hz, 1H), 7.14 (d, *J* = 8.7 Hz, 2H), 7.06 (d, *J* = 5.0 Hz, 1H), 6.93 (d, *J* = 8.7 Hz, 2H), 4.56 (td, *J* = 7.8, 6.1 Hz, 1H), 4.38 (dt, *J* = 9.2, 5.9 Hz, 1H), 3.85 (s, 3H), 2.73 (ddd, *J* = 11.0, 9.2, 7.6 Hz, 1H), 2.31 (ddd, *J* = 11.1, 8.2, 5.8 Hz, 1H), 1.65 (s, 3H).

**<sup>13</sup>C NMR** (CDCl<sub>3</sub>, 150.90 MHz) δ 159.49, 147.99, 147.21, 146.24, 140.80, 131.94, 129.87, 125.62, 113.73, 86.20, 65.13, 55.42, 35.92, 30.88.

**FTIR** (ν<sub>max</sub> cm<sup>-1</sup>) 2968, 2885, 1611, 1515, 1477, 1247, 1177, 1042, 907, 729.

**HRMS** (ESI+) Calculated for C<sub>16</sub>H<sub>18</sub>NO<sub>2</sub>: 256.1343; Found (M+H)<sup>+</sup>: 256.1346.

#### 3-(2-methyloxetan-2-yl)-4-(p-tolyl)pyridine (13)

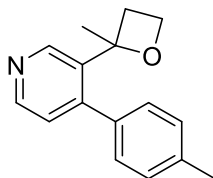

Synthesized according to the general procedure C with 4-methylphenylboronic acid (0.75, 102 mg, 1.5 eq.) and isolated as a colorless oil (104 mg, 87% yield) by column chromatography over silica gel (Petr. ether/EtOAc = 30/70).

**R<sub>f</sub>** 0.34 (Petr. ether/EtOAc = 30/70). colorless oil.



**<sup>1</sup>H NMR** (CDCl<sub>3</sub>, 399.57 MHz) δ 8.91 (s, 1H), 8.53 (d, *J* = 5.0 Hz, 1H), 7.22 (d, *J* = 7.9 Hz, 2H), 7.11 (d, *J* = 8.0 Hz, 2H), 7.08 (d, *J* = 5.0 Hz, 1H), 4.57 (dt, *J* = 13.9, 7.0 Hz, 1H), 4.39 (dt, *J* = 9.2, 5.9 Hz, 1H), 2.74 (ddd, *J* = 10.9, 9.2, 7.7 Hz, 1H), 2.41 (s, 3H), 2.31 (ddd, *J* = 11.1, 8.2, 5.9 Hz, 1H), 1.64 (s, 3H).

**<sup>13</sup>C NMR** (CDCl<sub>3</sub>, 100.47 MHz) δ 147.99, 147.17, 146.45, 140.65, 137.91, 136.77, 128.95, 128.52, 125.44, 86.19, 65.10, 35.95, 30.88, 21.30.

**FTIR** (ν<sub>max</sub> cm<sup>-1</sup>) 2966, 2880, 1586, 1476, 1401, 1253, 1083, 964, 817.

**HRMS** (ESI+) Calculated for C<sub>16</sub>H<sub>18</sub>NO: 240.1380; Found (M+H)<sup>+</sup>: 240.1385.

## V. GC/MS analysis of the chlorination reaction

GC/MS analysis of the crude mixture of the reaction of **1** according to general procedure B.

Reference **2a**.

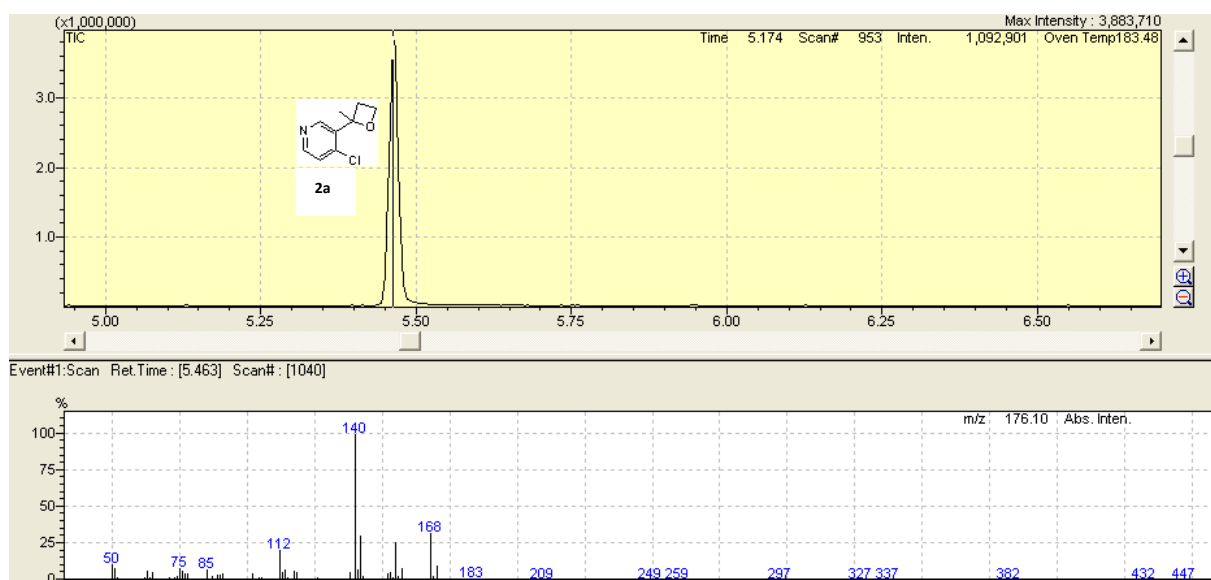

### Reference 3a.

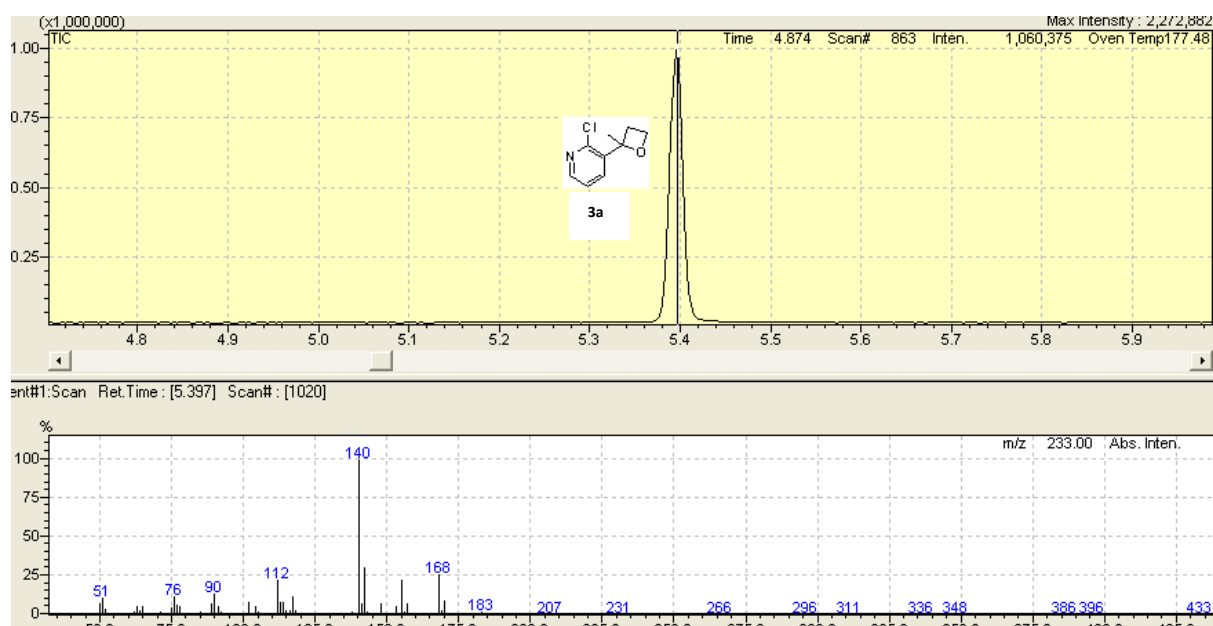

### Crude mixture.

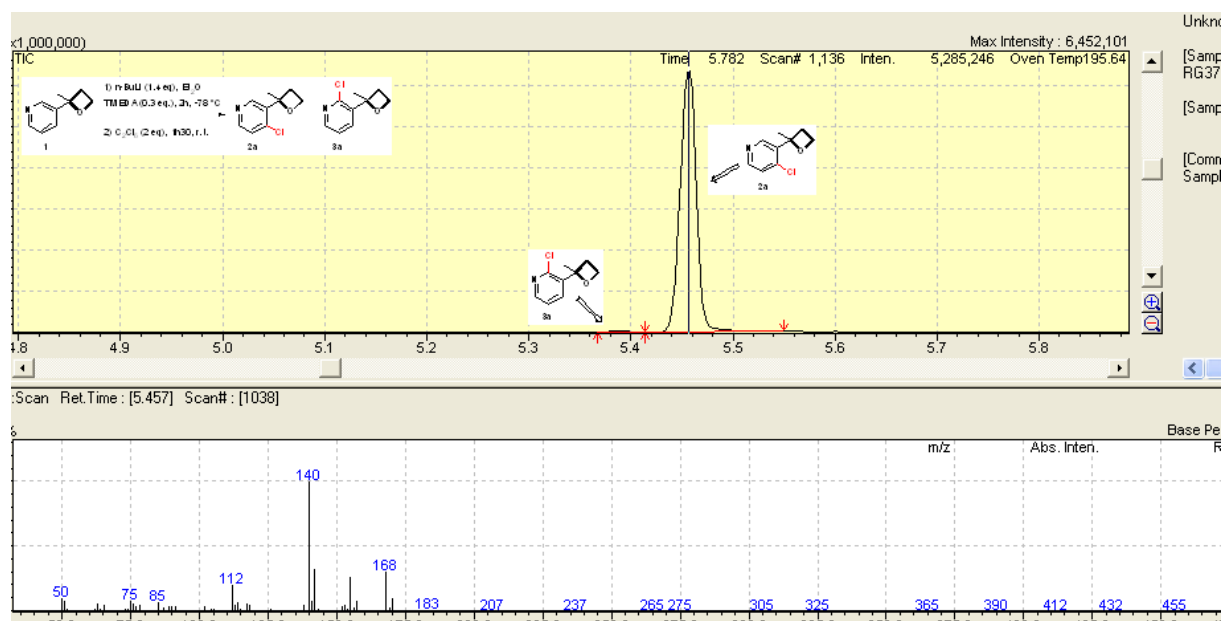

Zoom on the crude mixture.

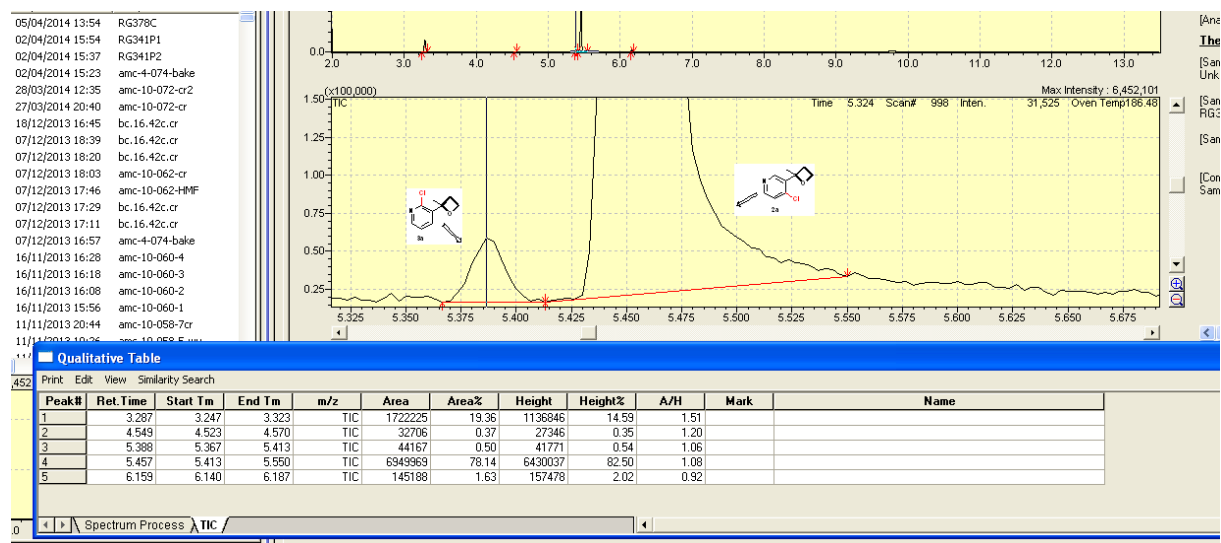

## VI. Deuterium labelled experiments

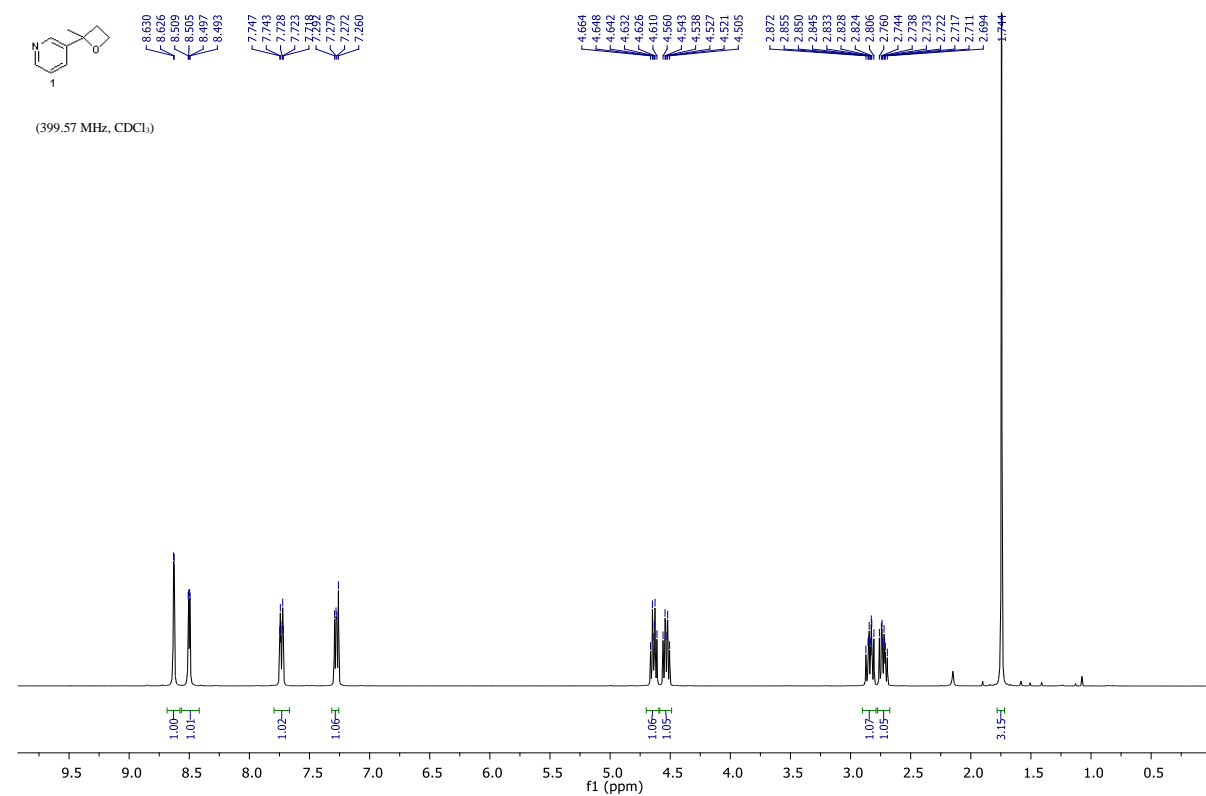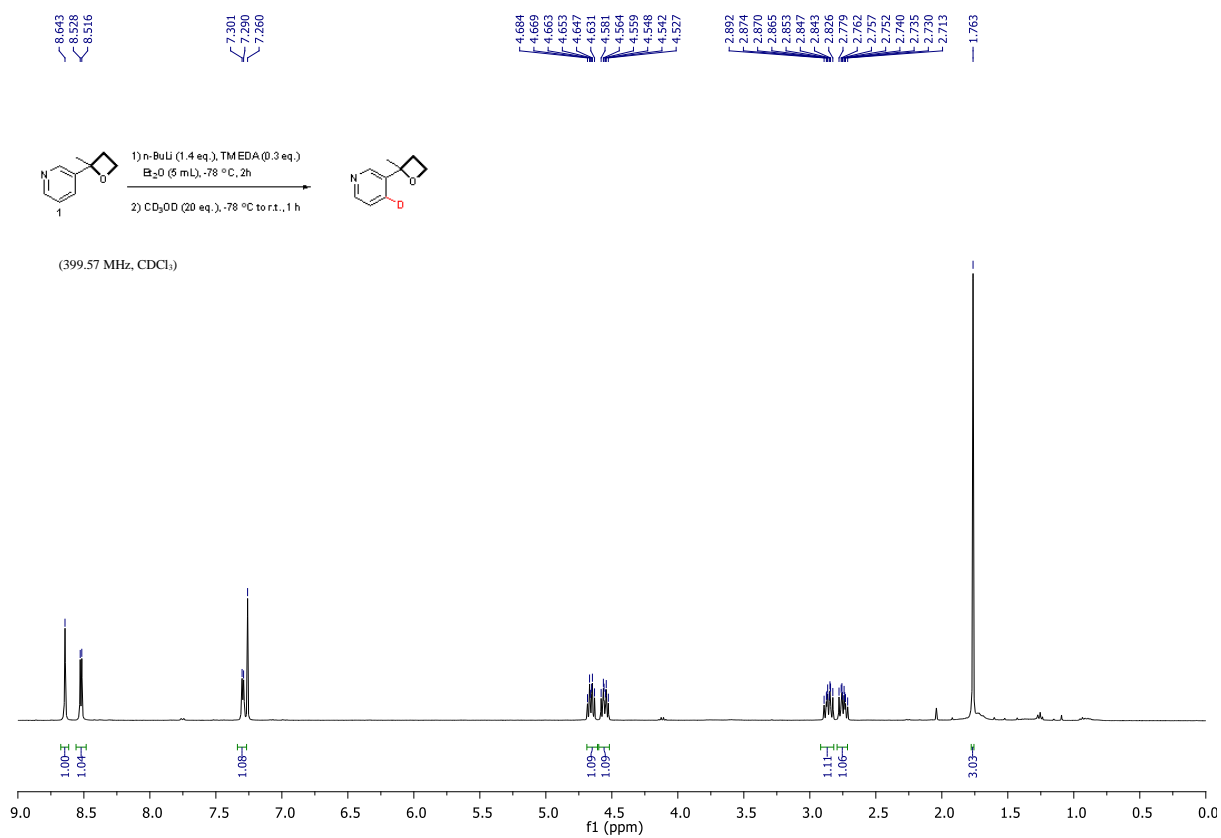

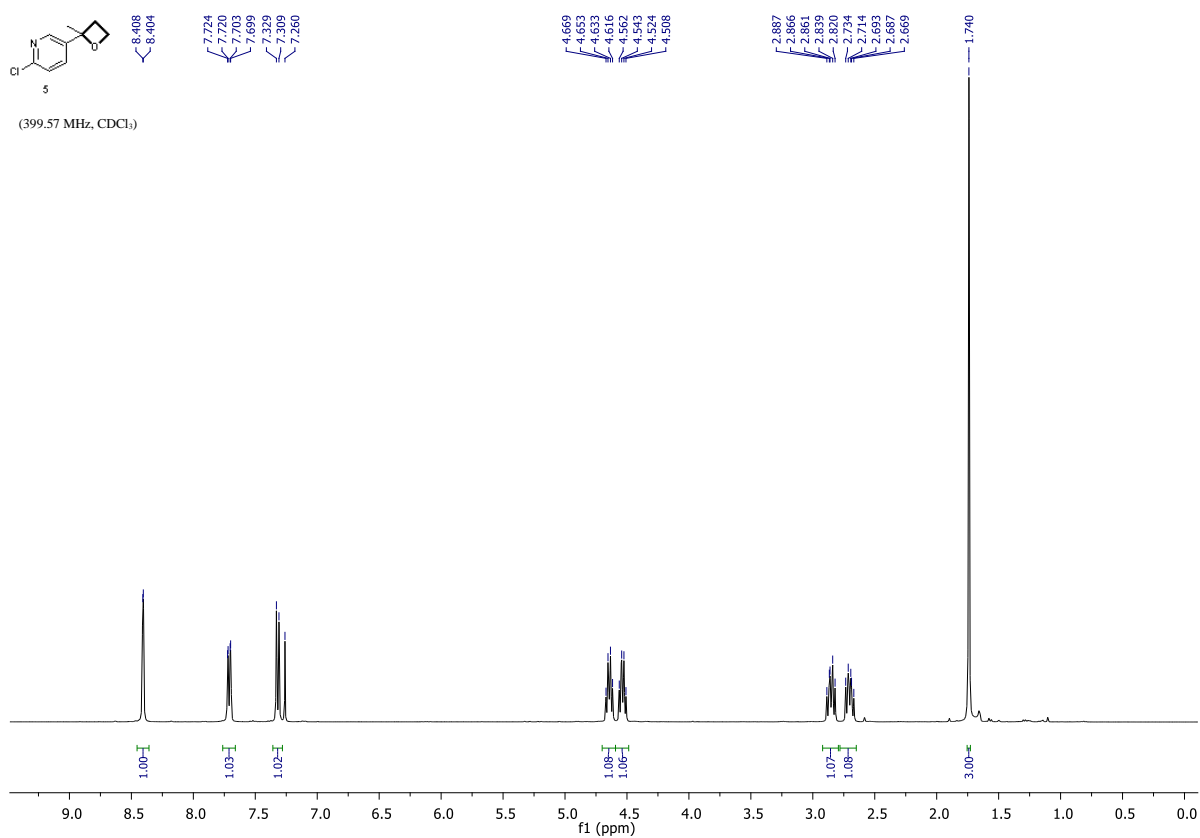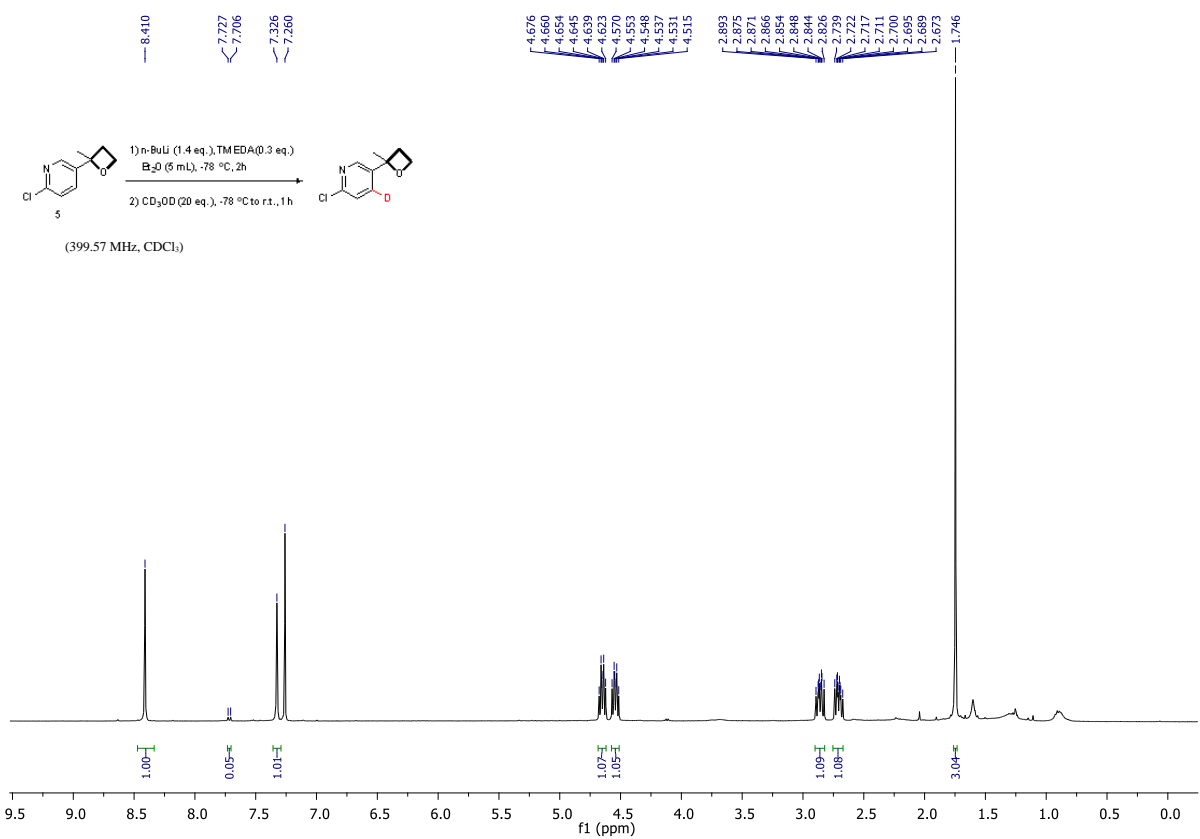

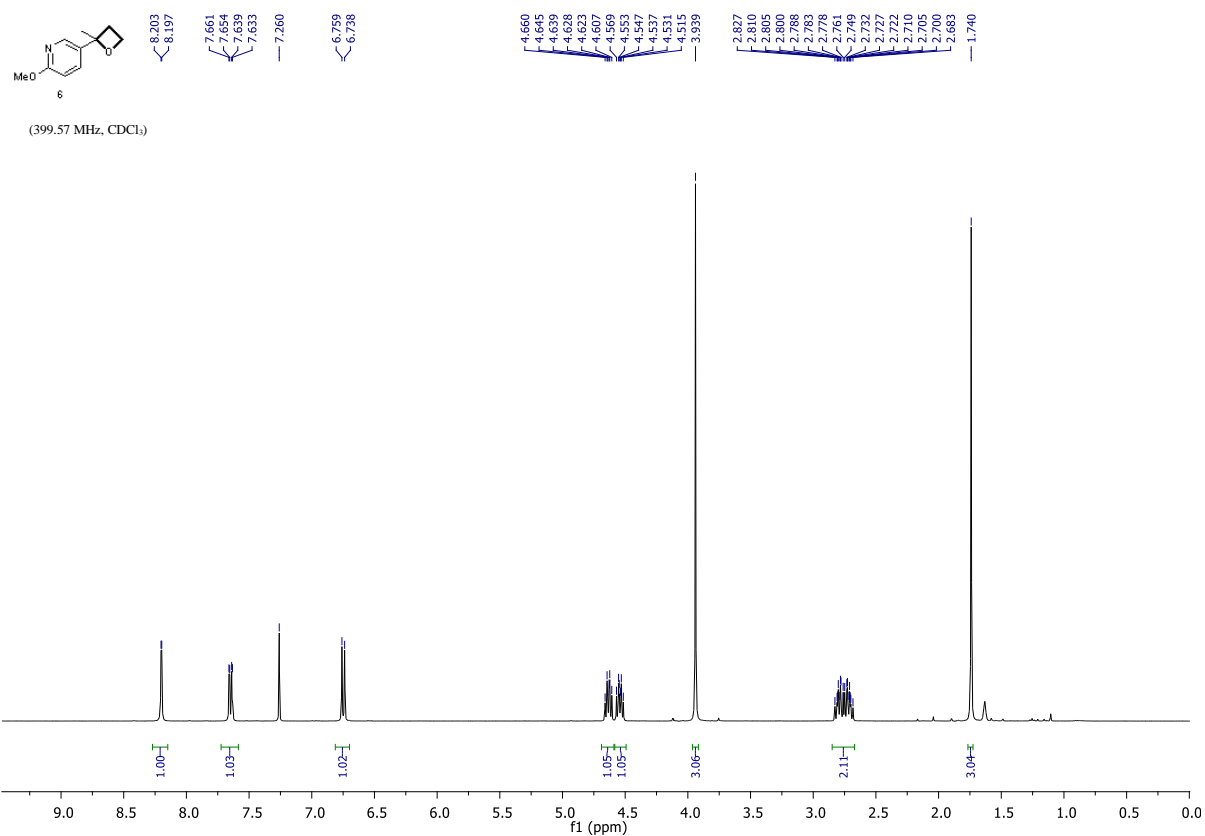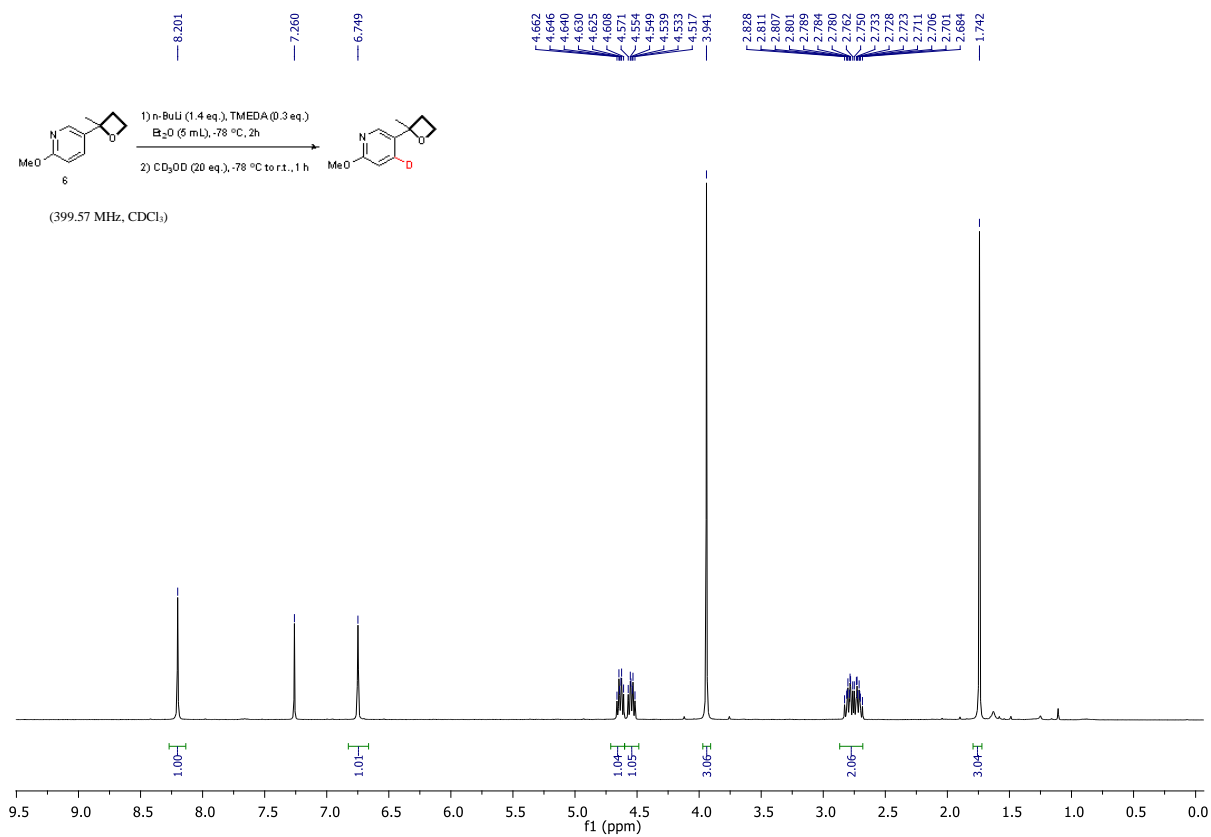

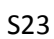

## **VII. Copies of $^1\text{H}$ and $^{13}\text{C}$ NMR Spectra**





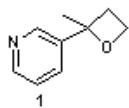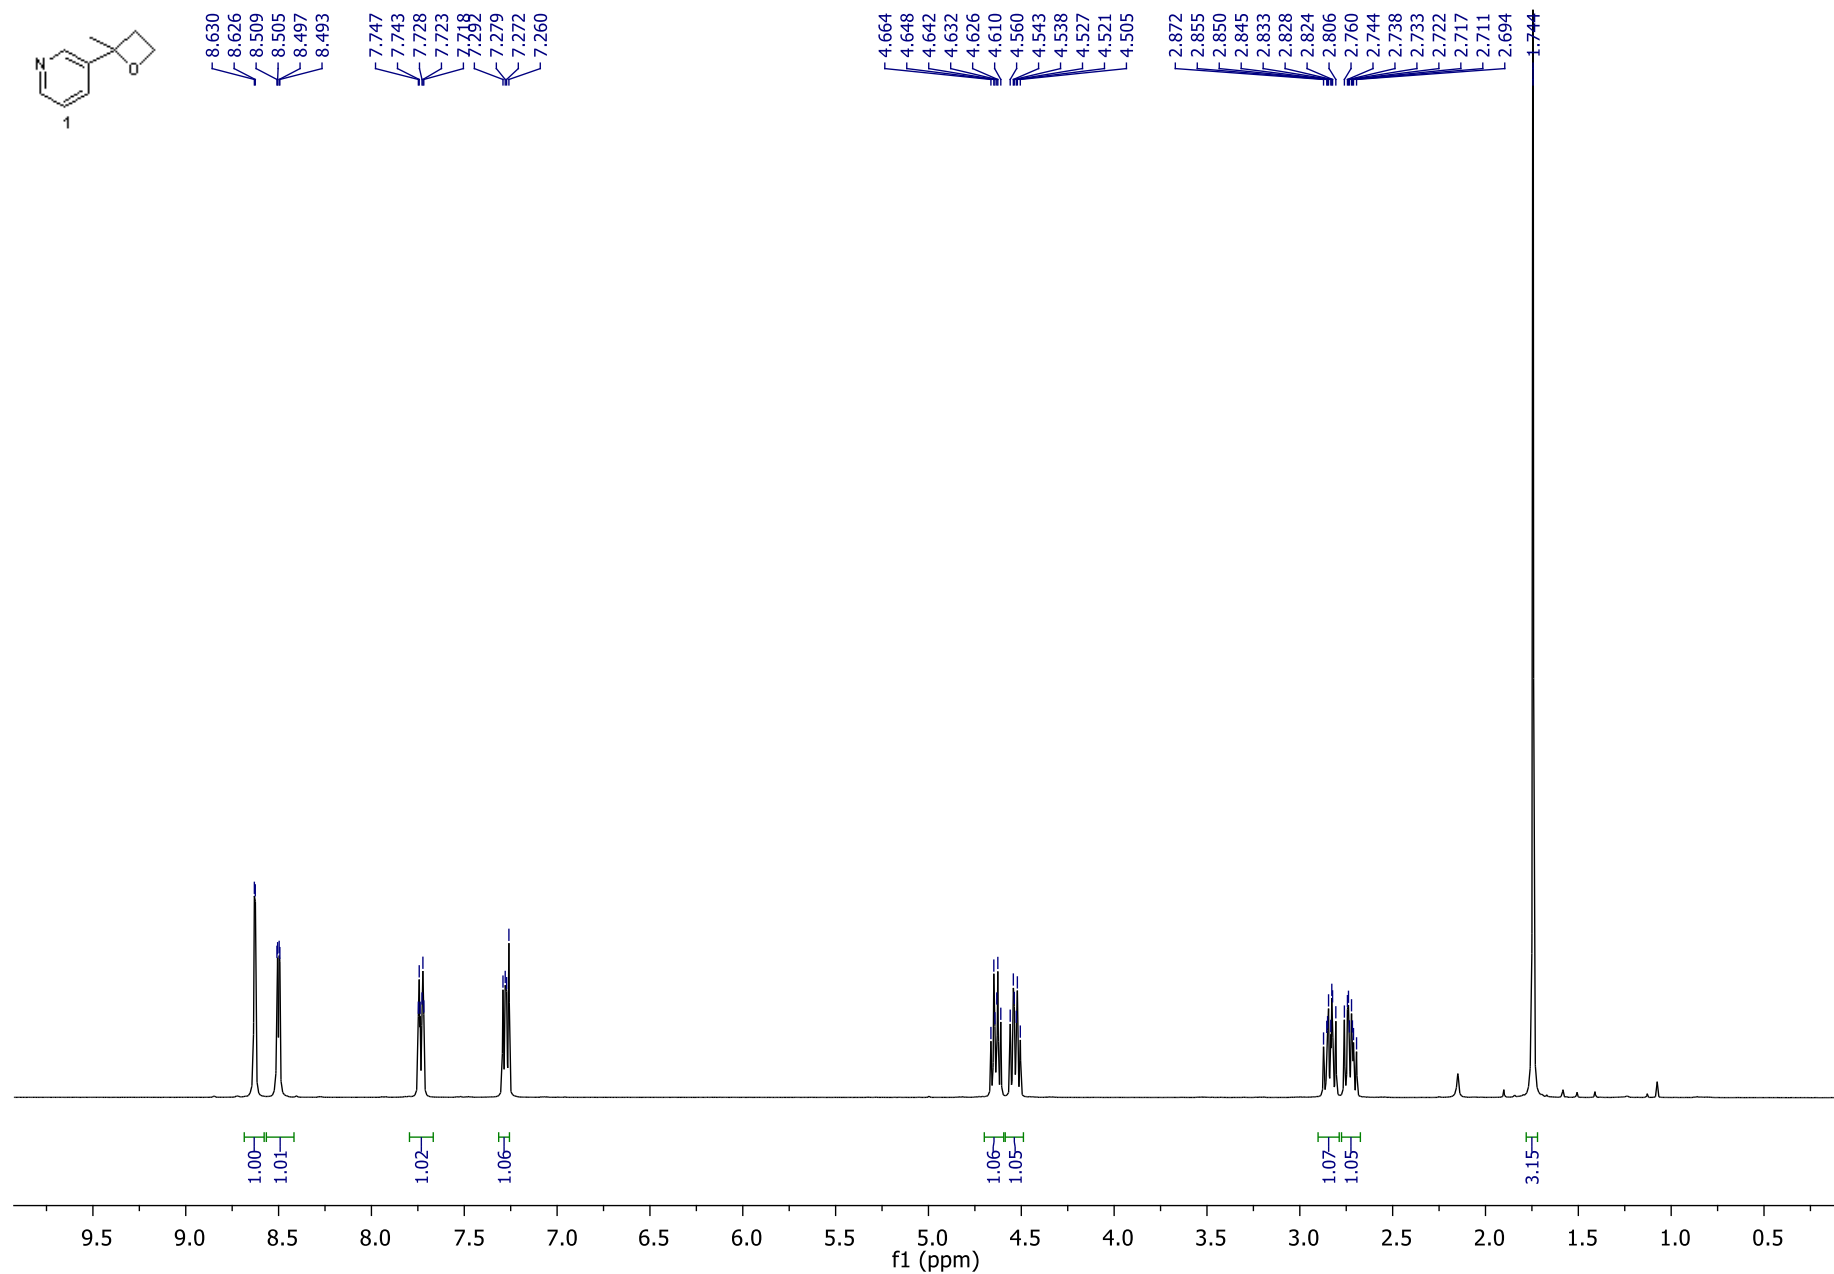

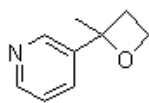

**1**

— 148.195  
— 145.888  
— 143.174

— 131.484

— 123.092

— 85.060

77.372  
77.160  
76.947

— 64.738

— 35.474

— 30.324

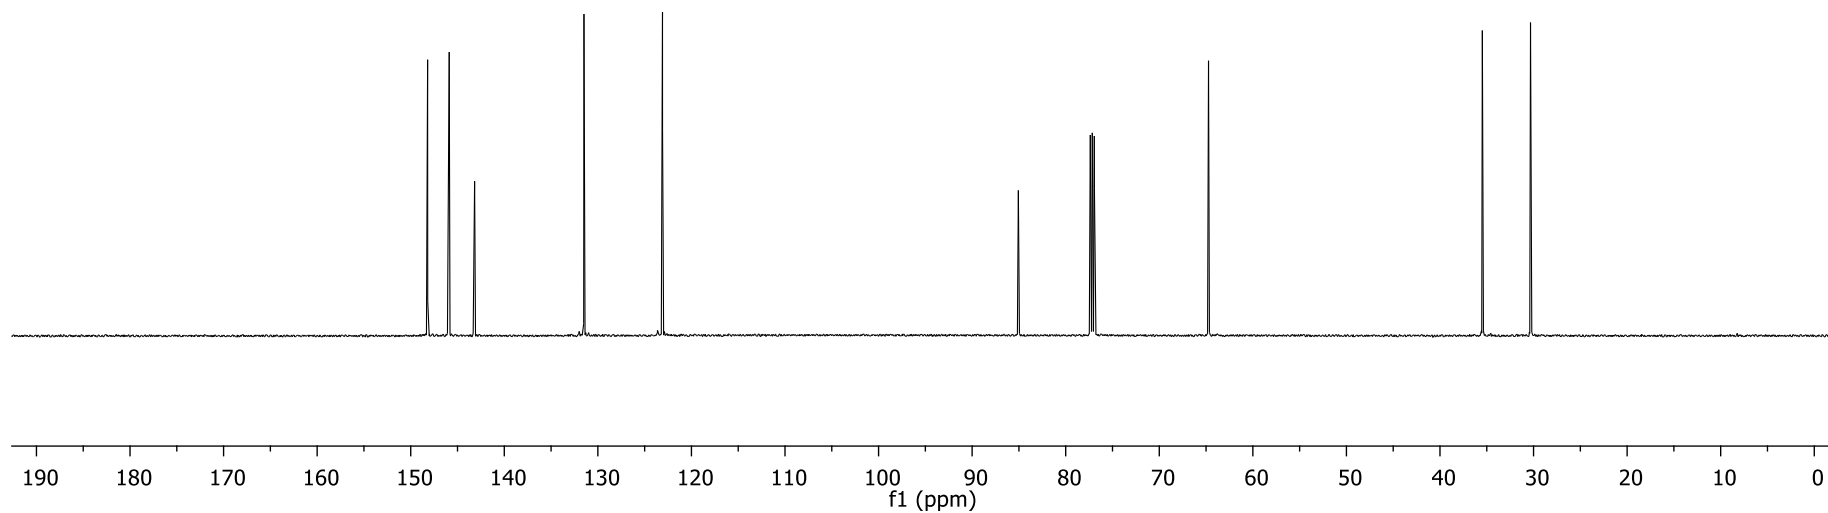

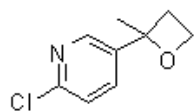

5

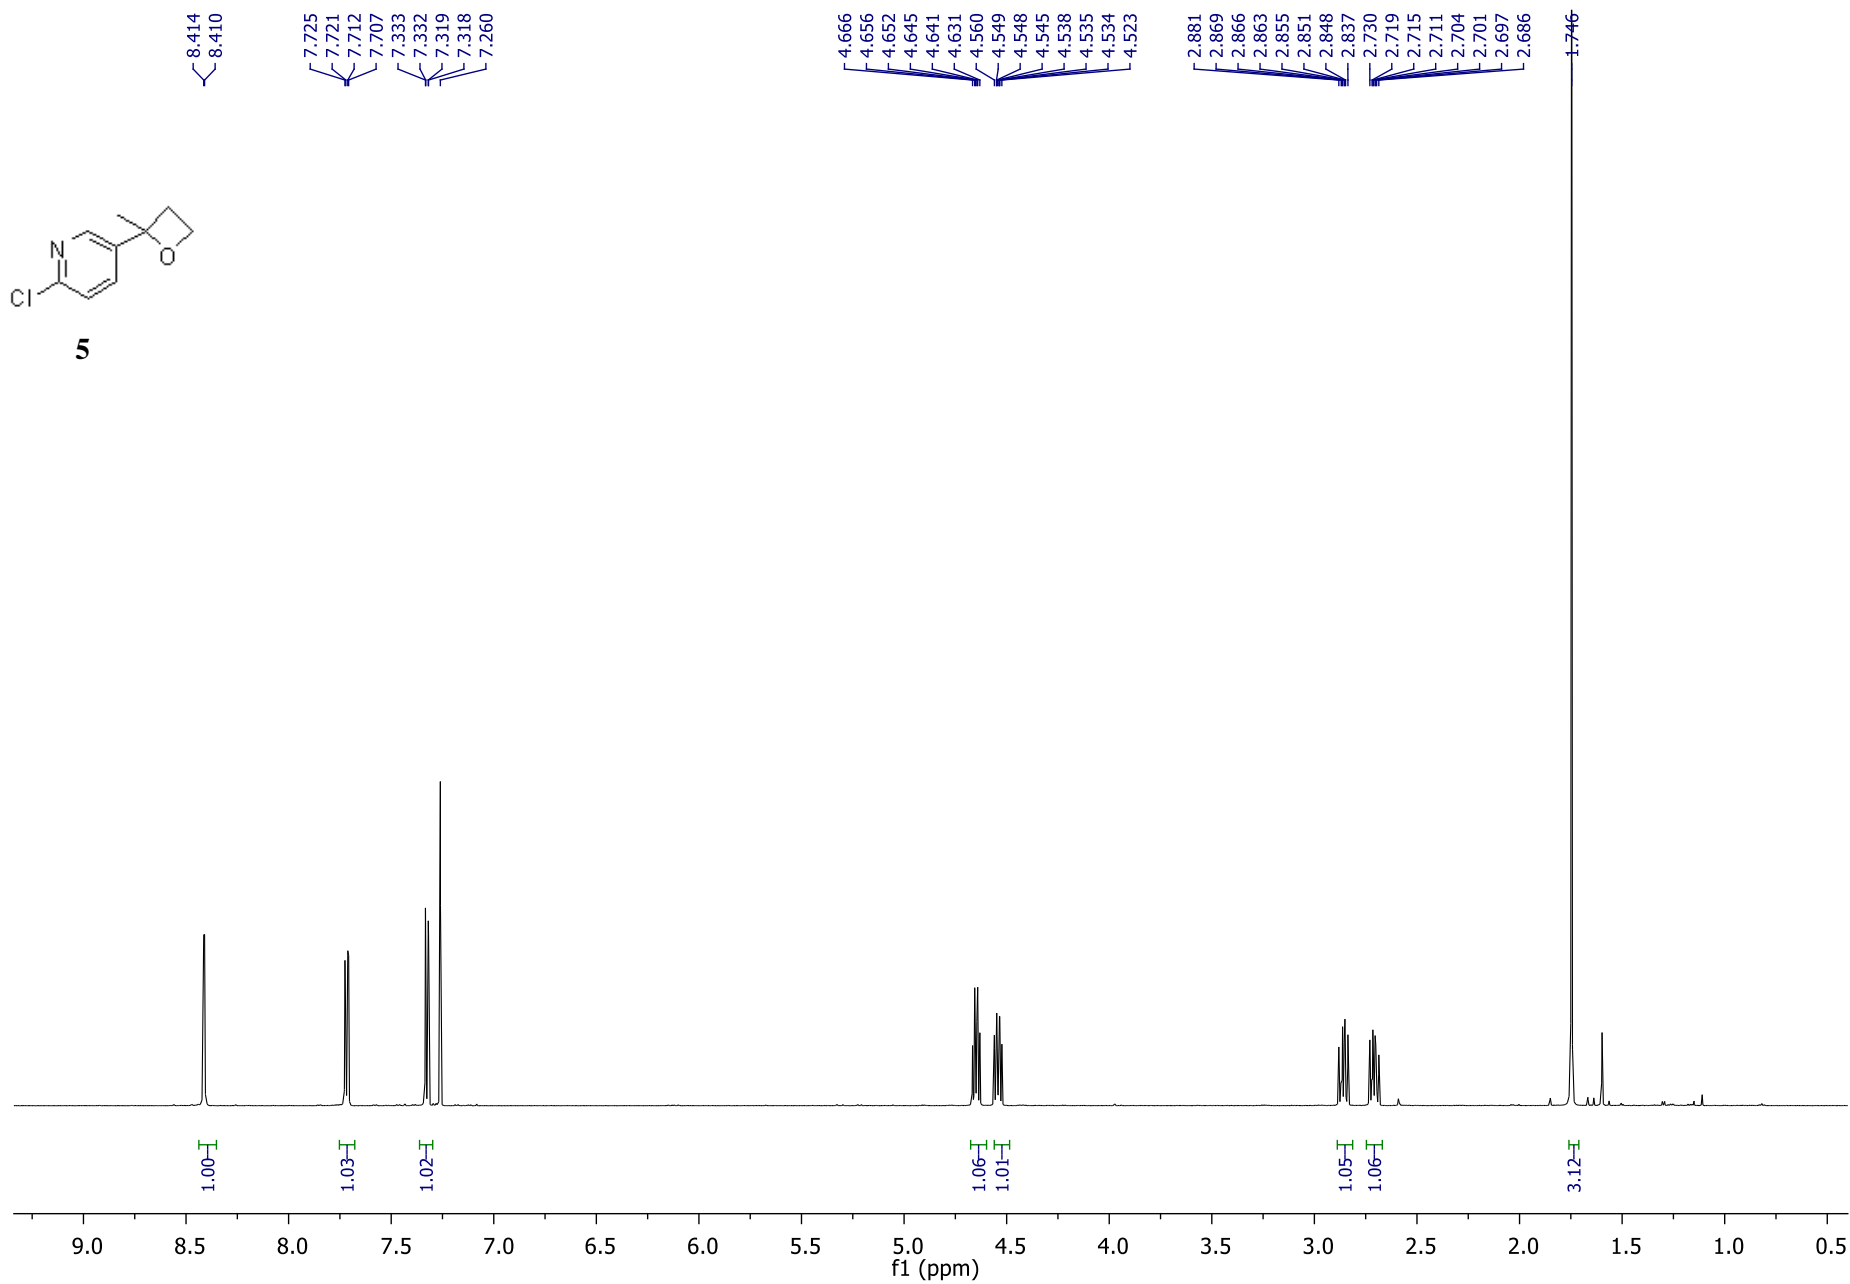

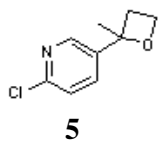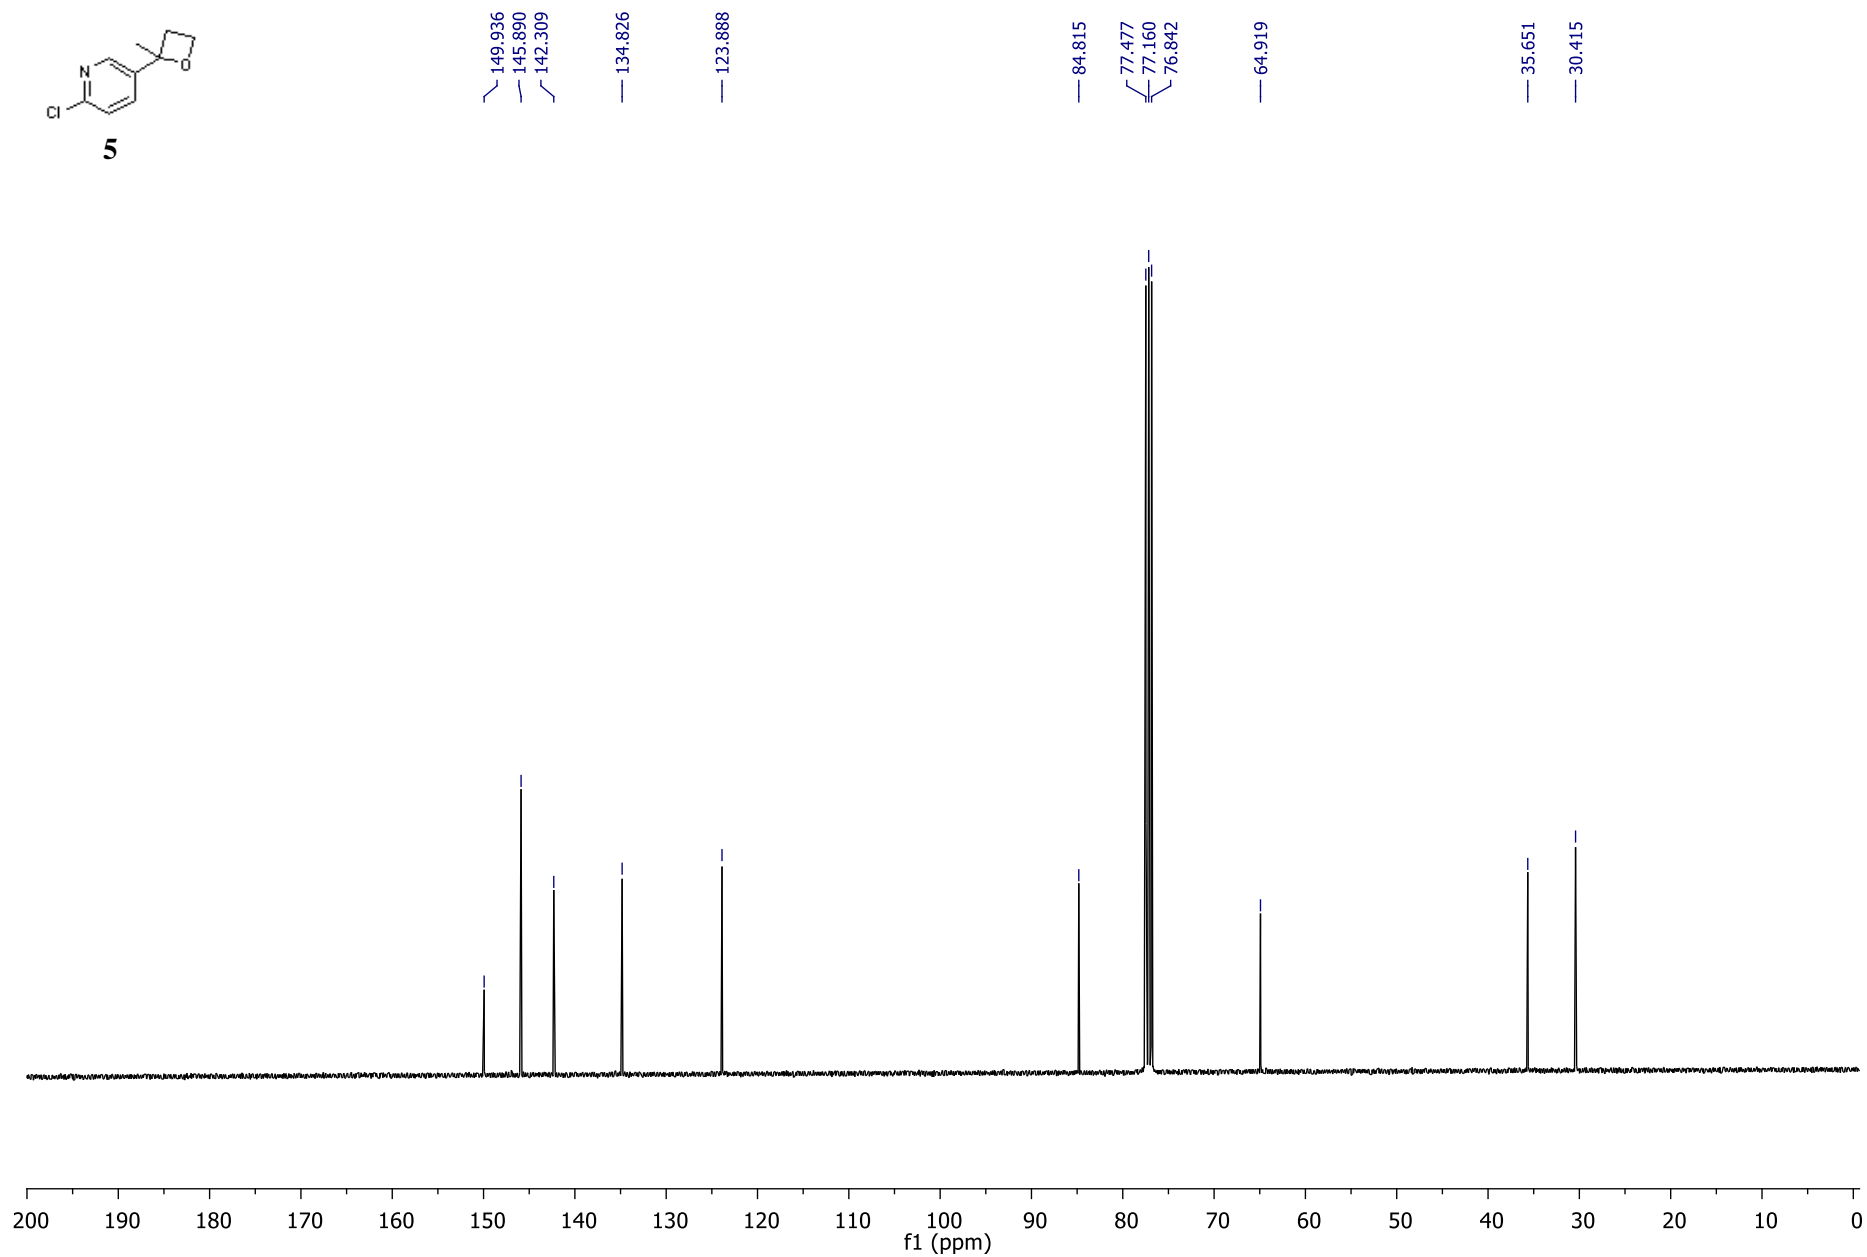

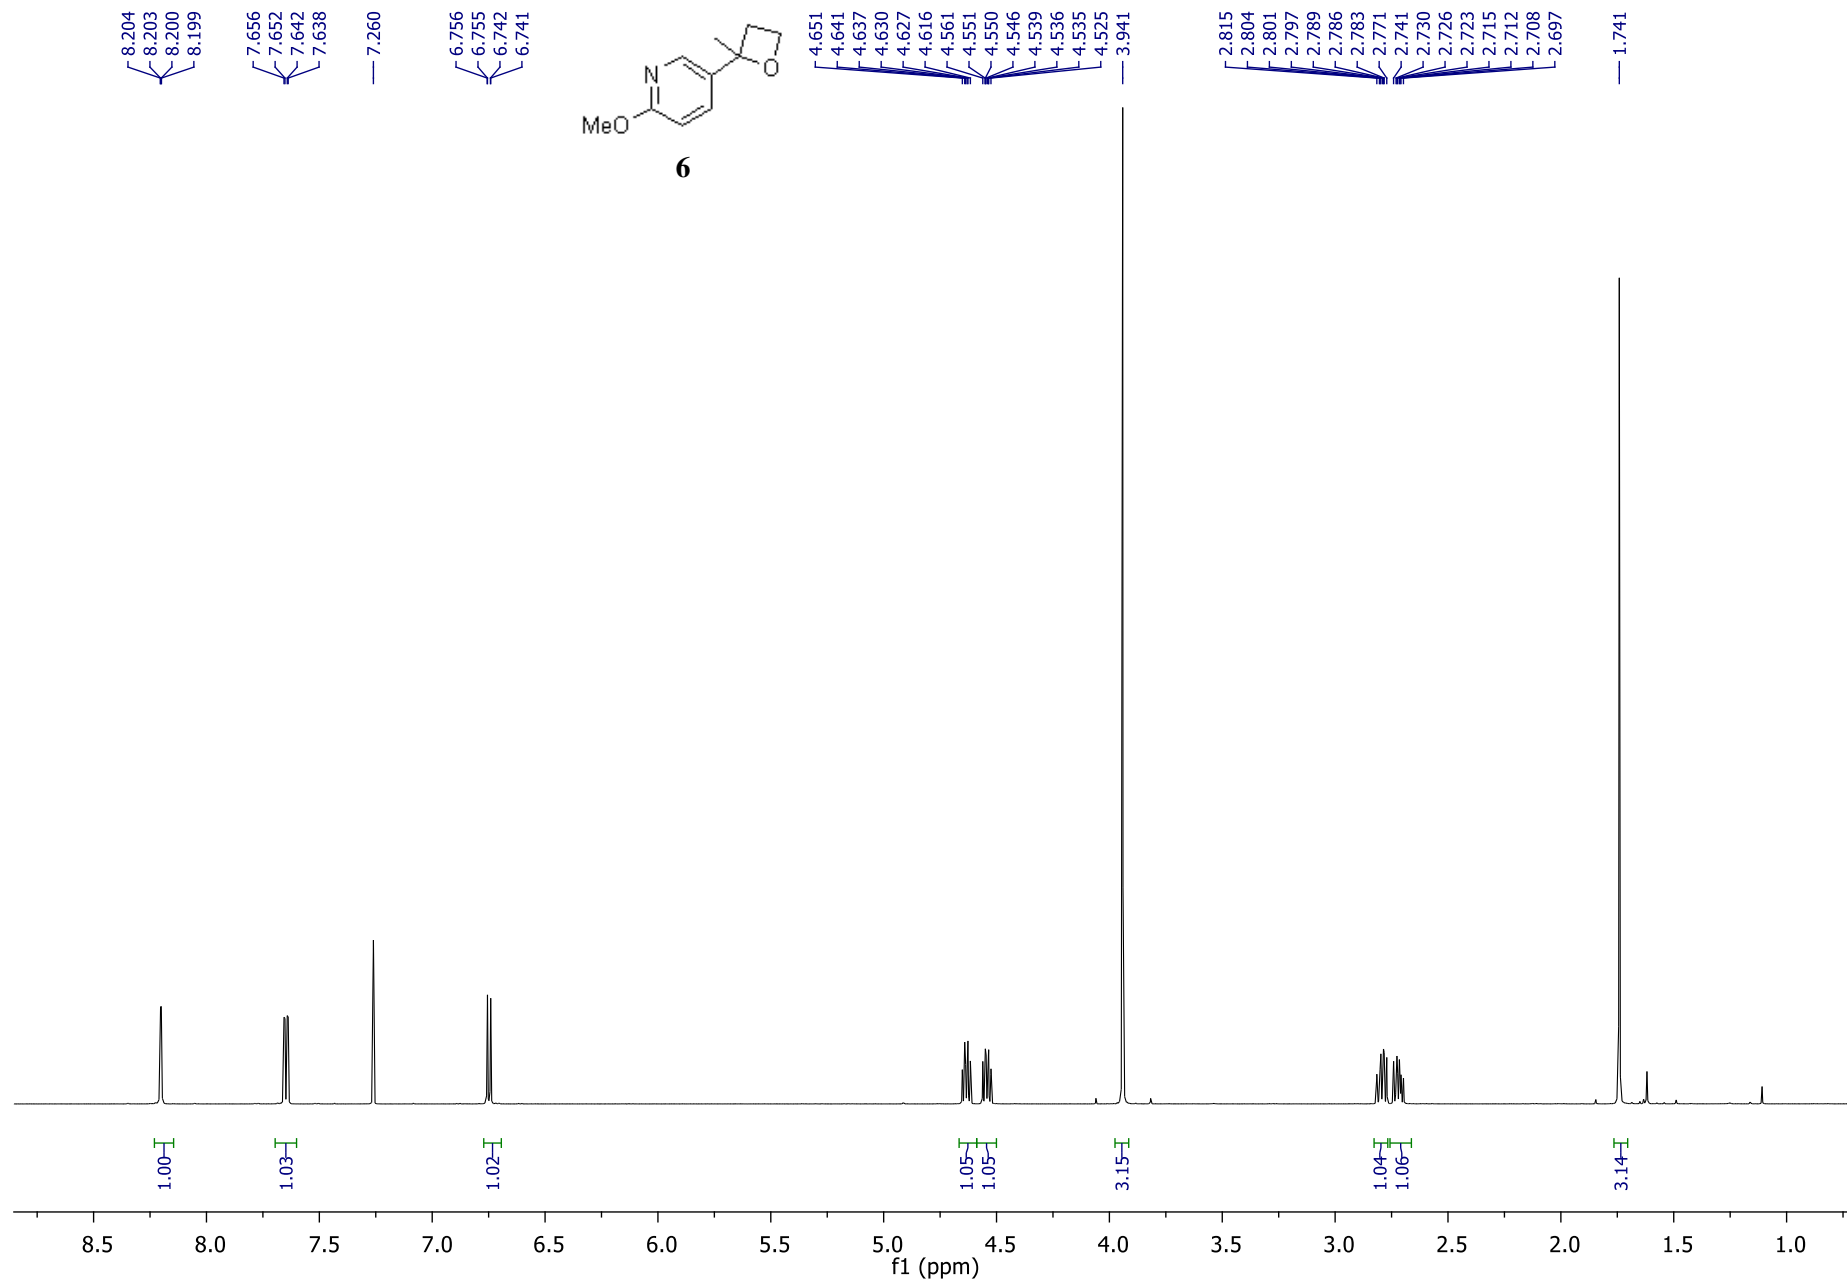

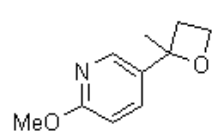

**6**

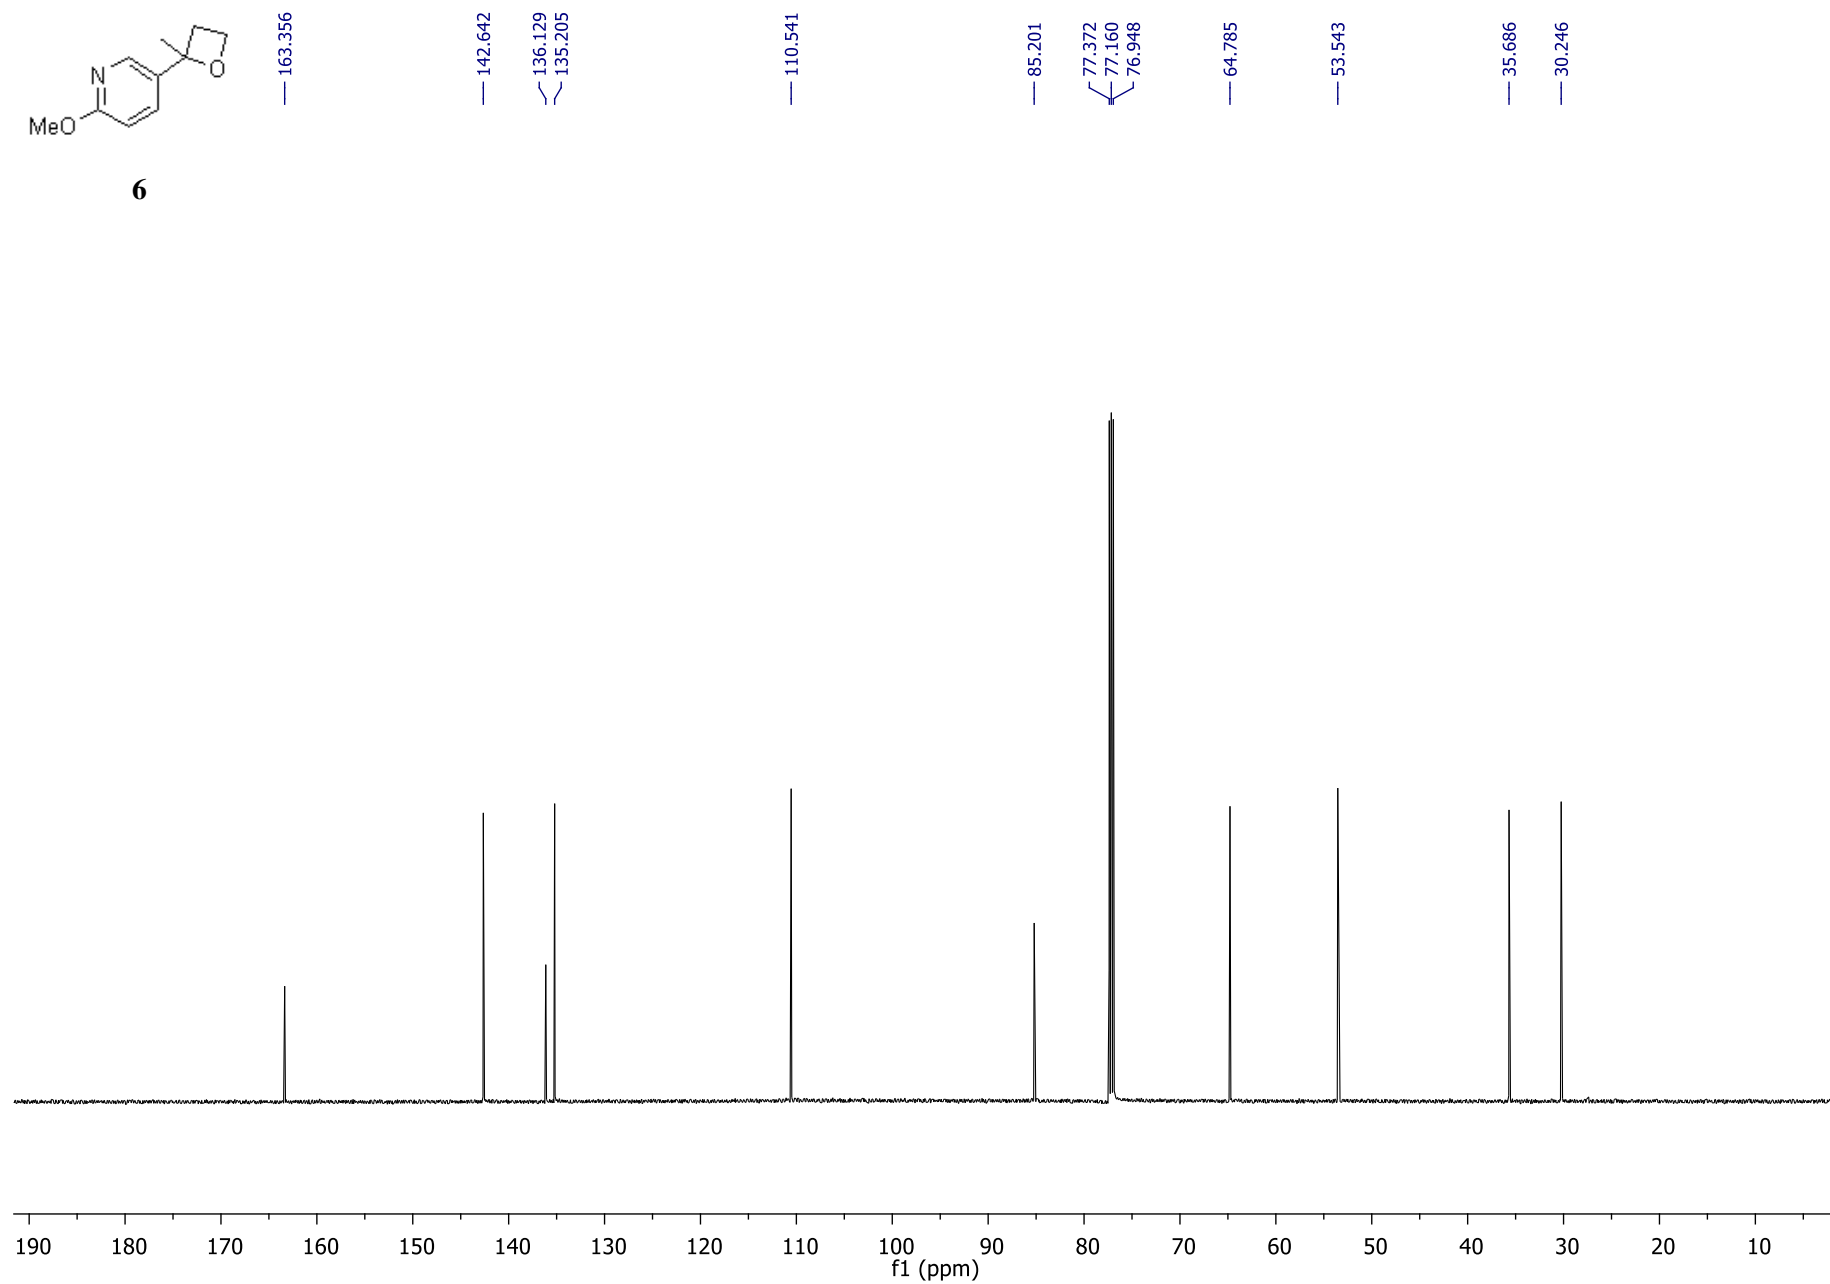

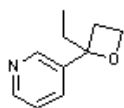

7

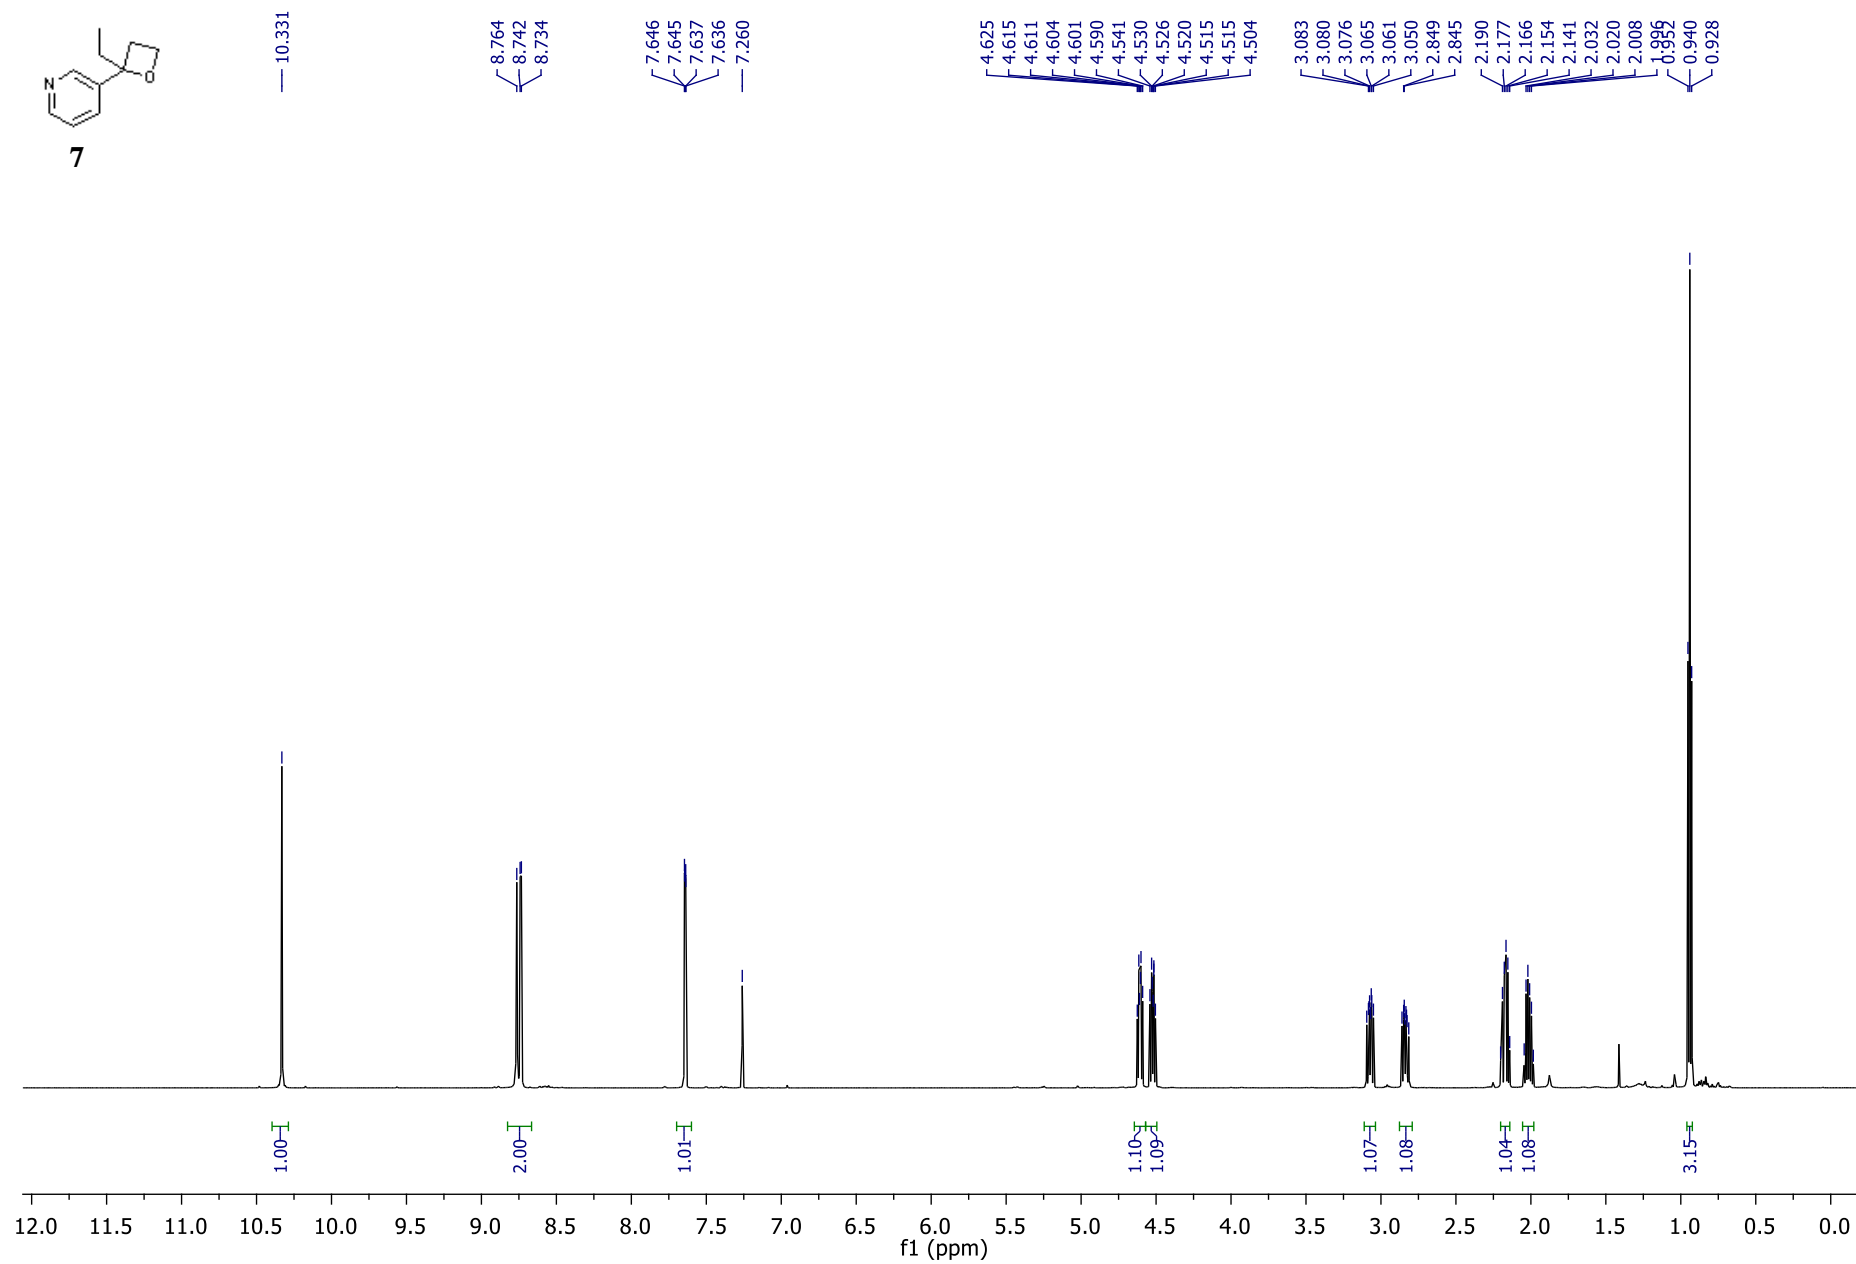



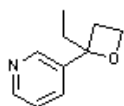

7

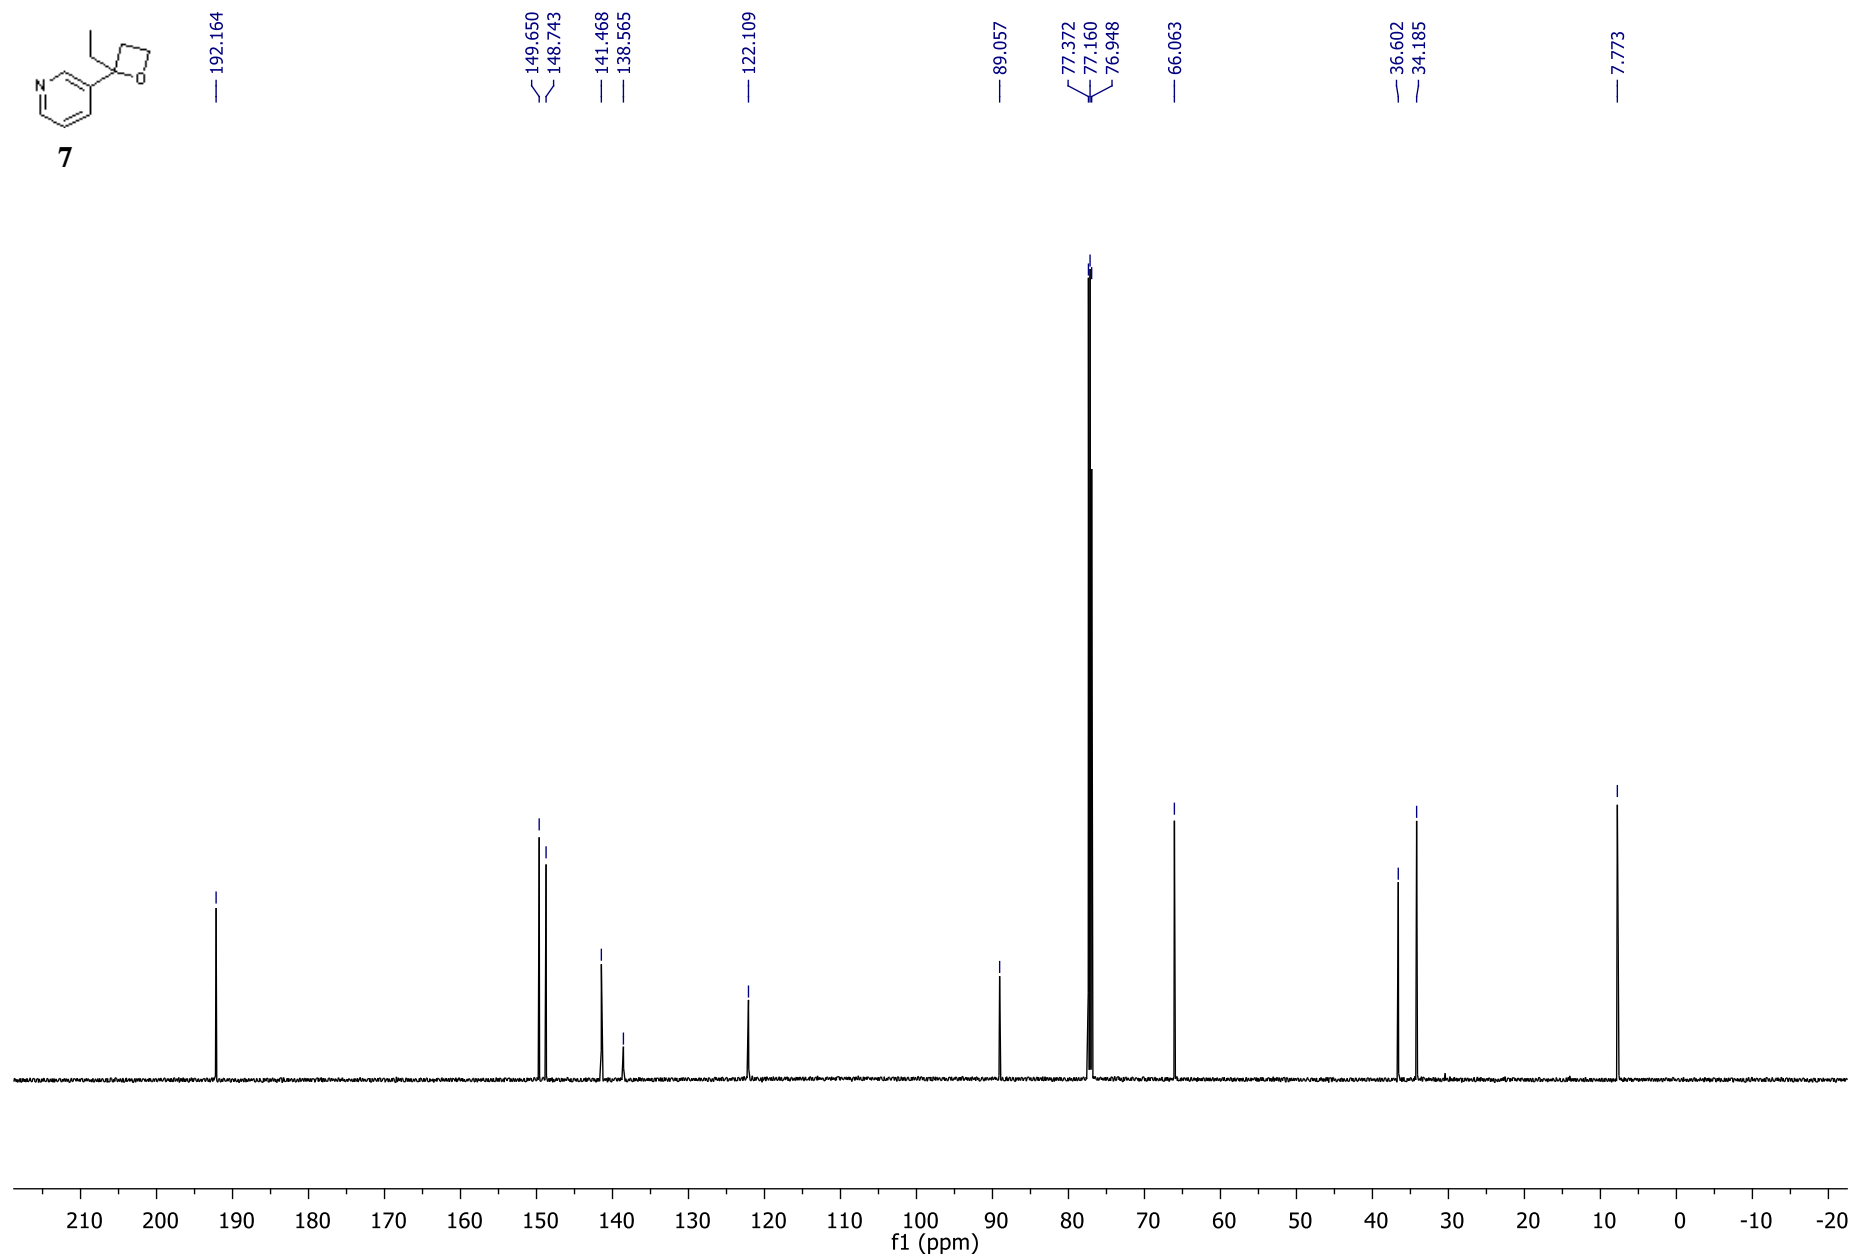

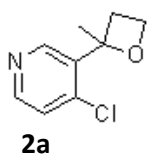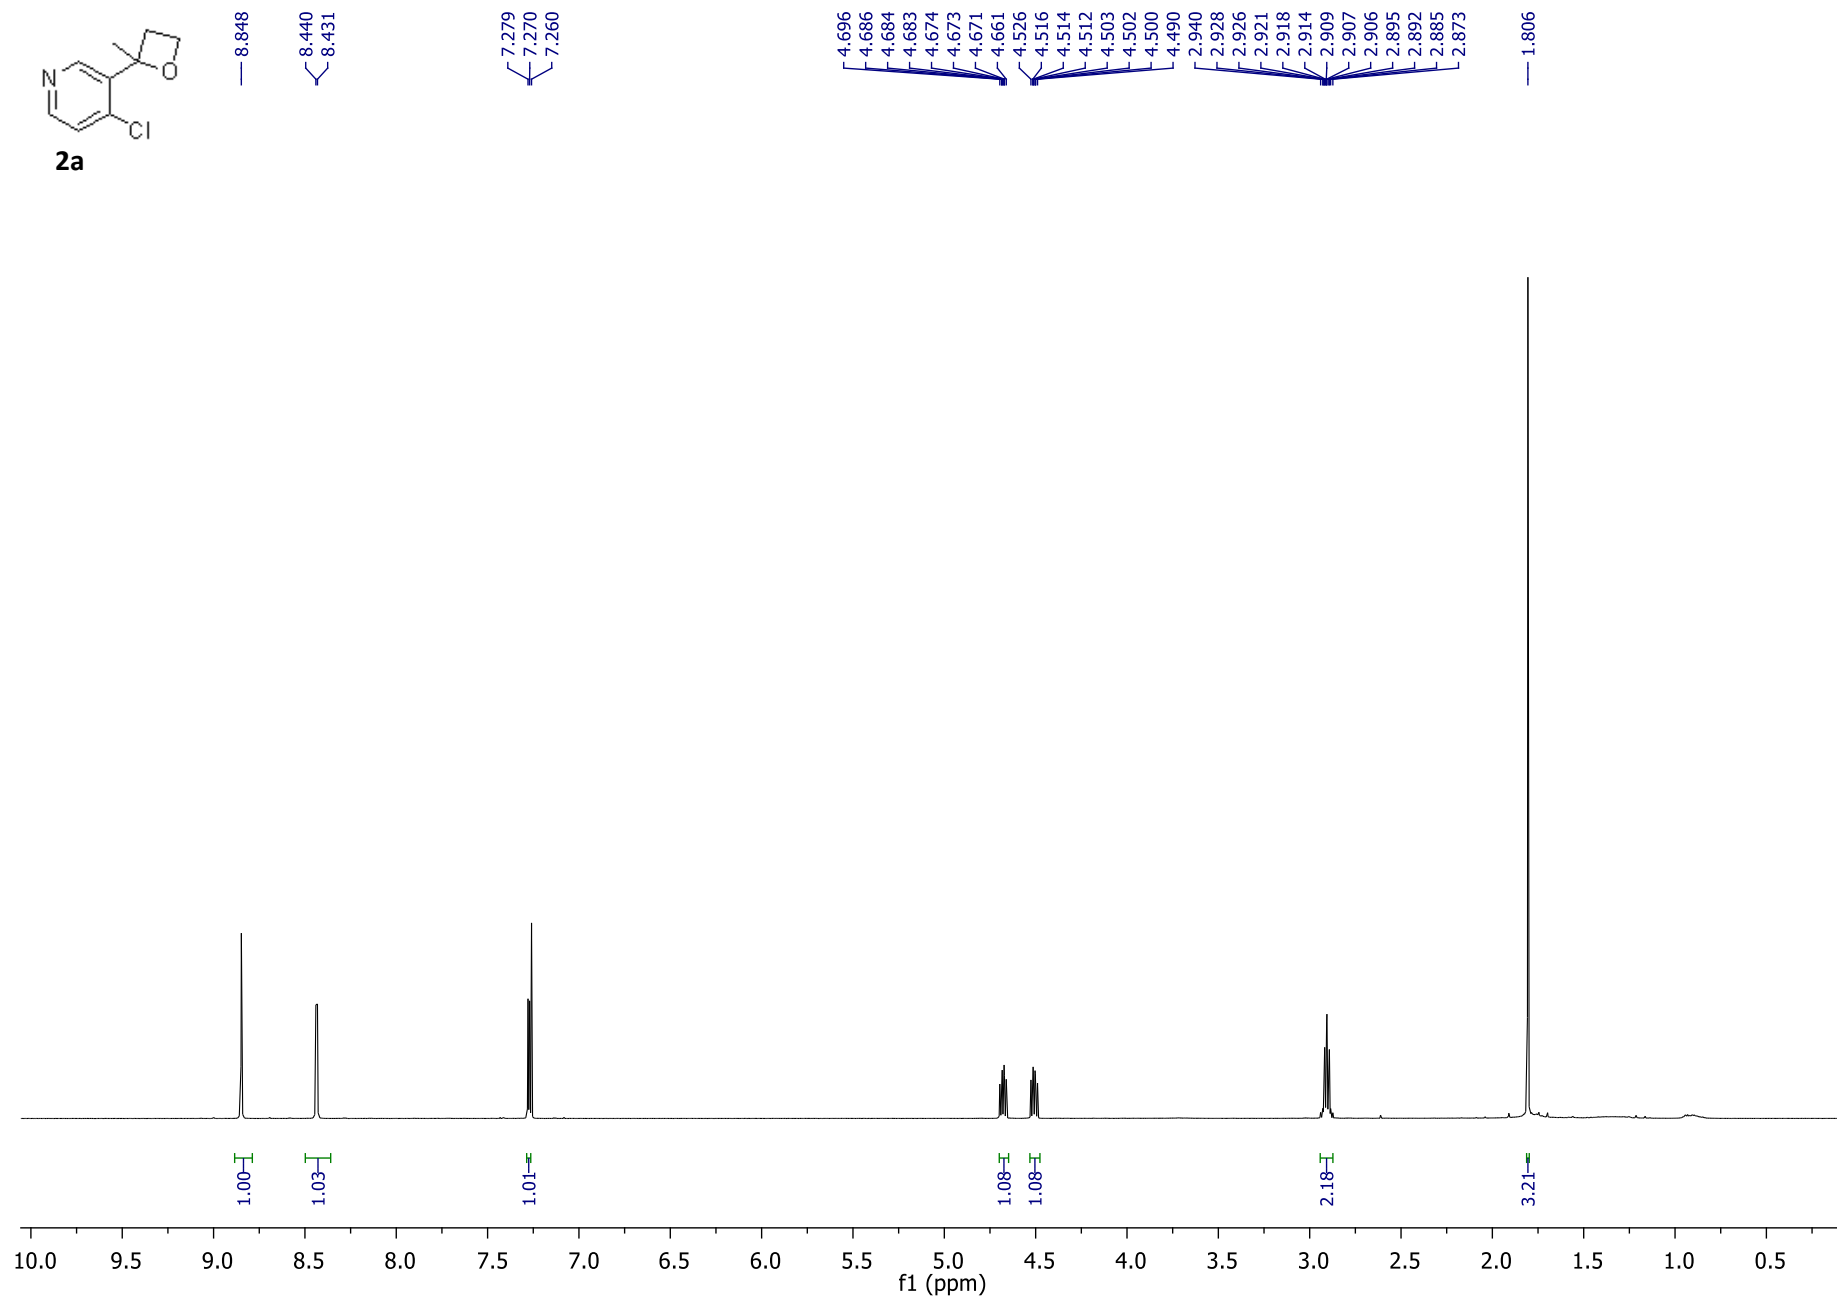

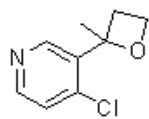

**2a**

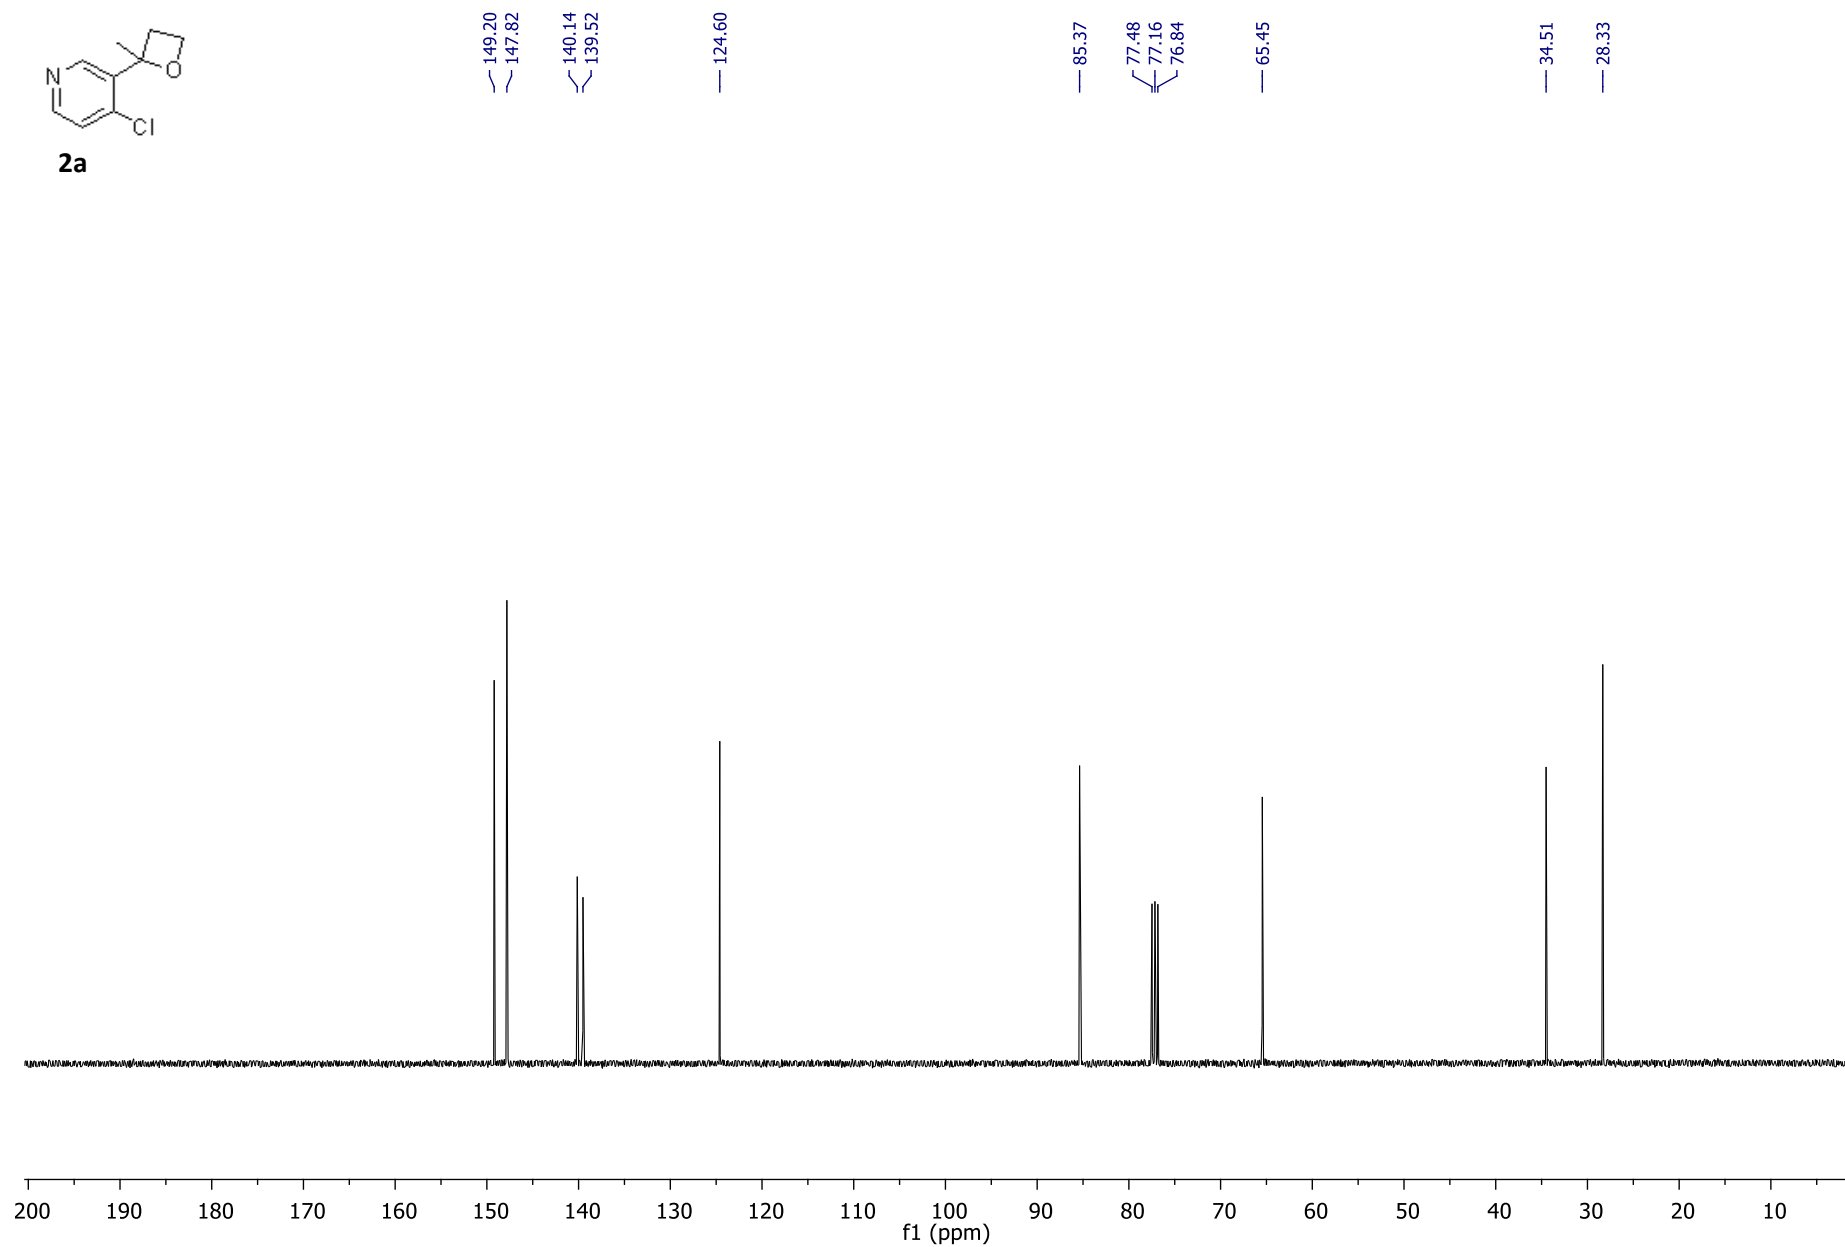

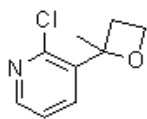

**3a**

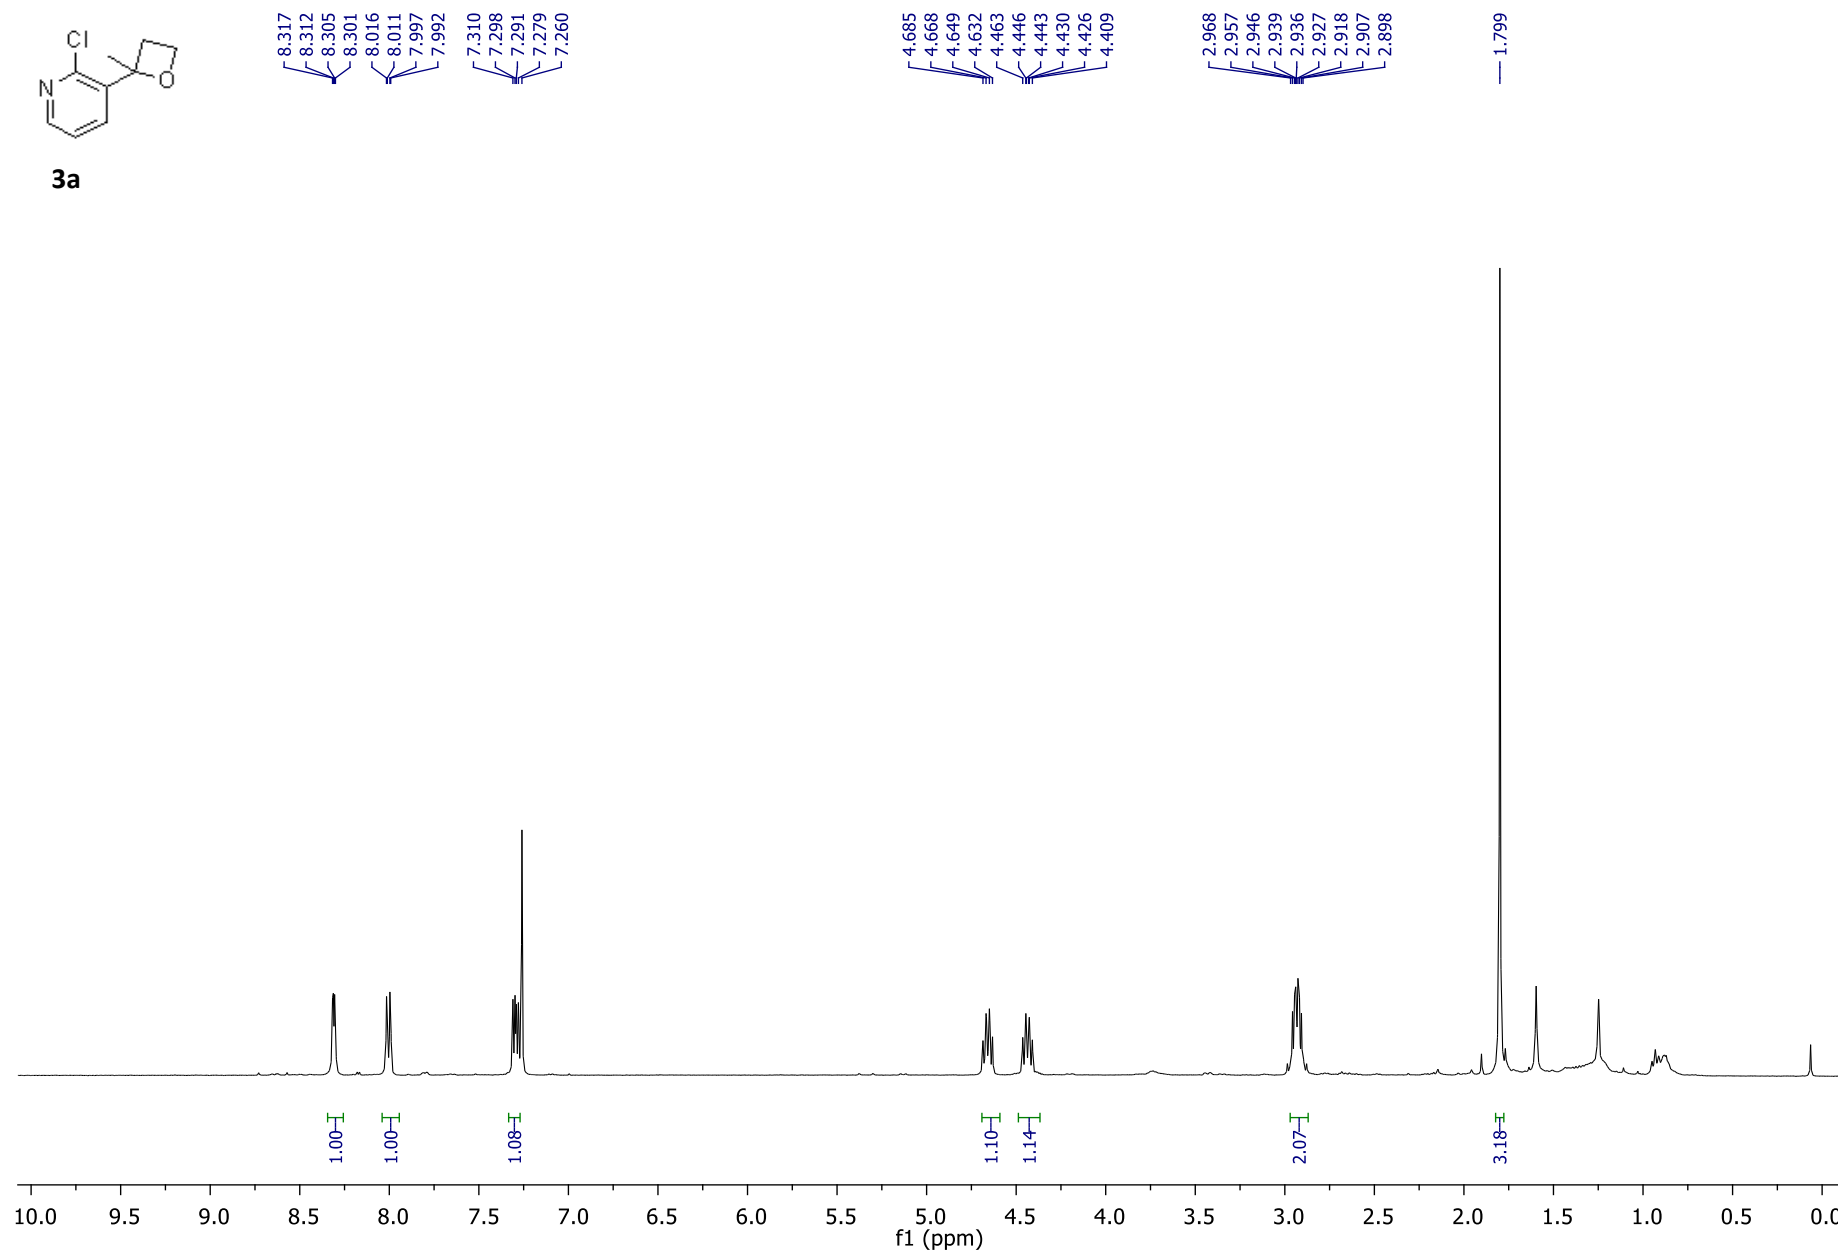

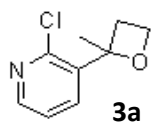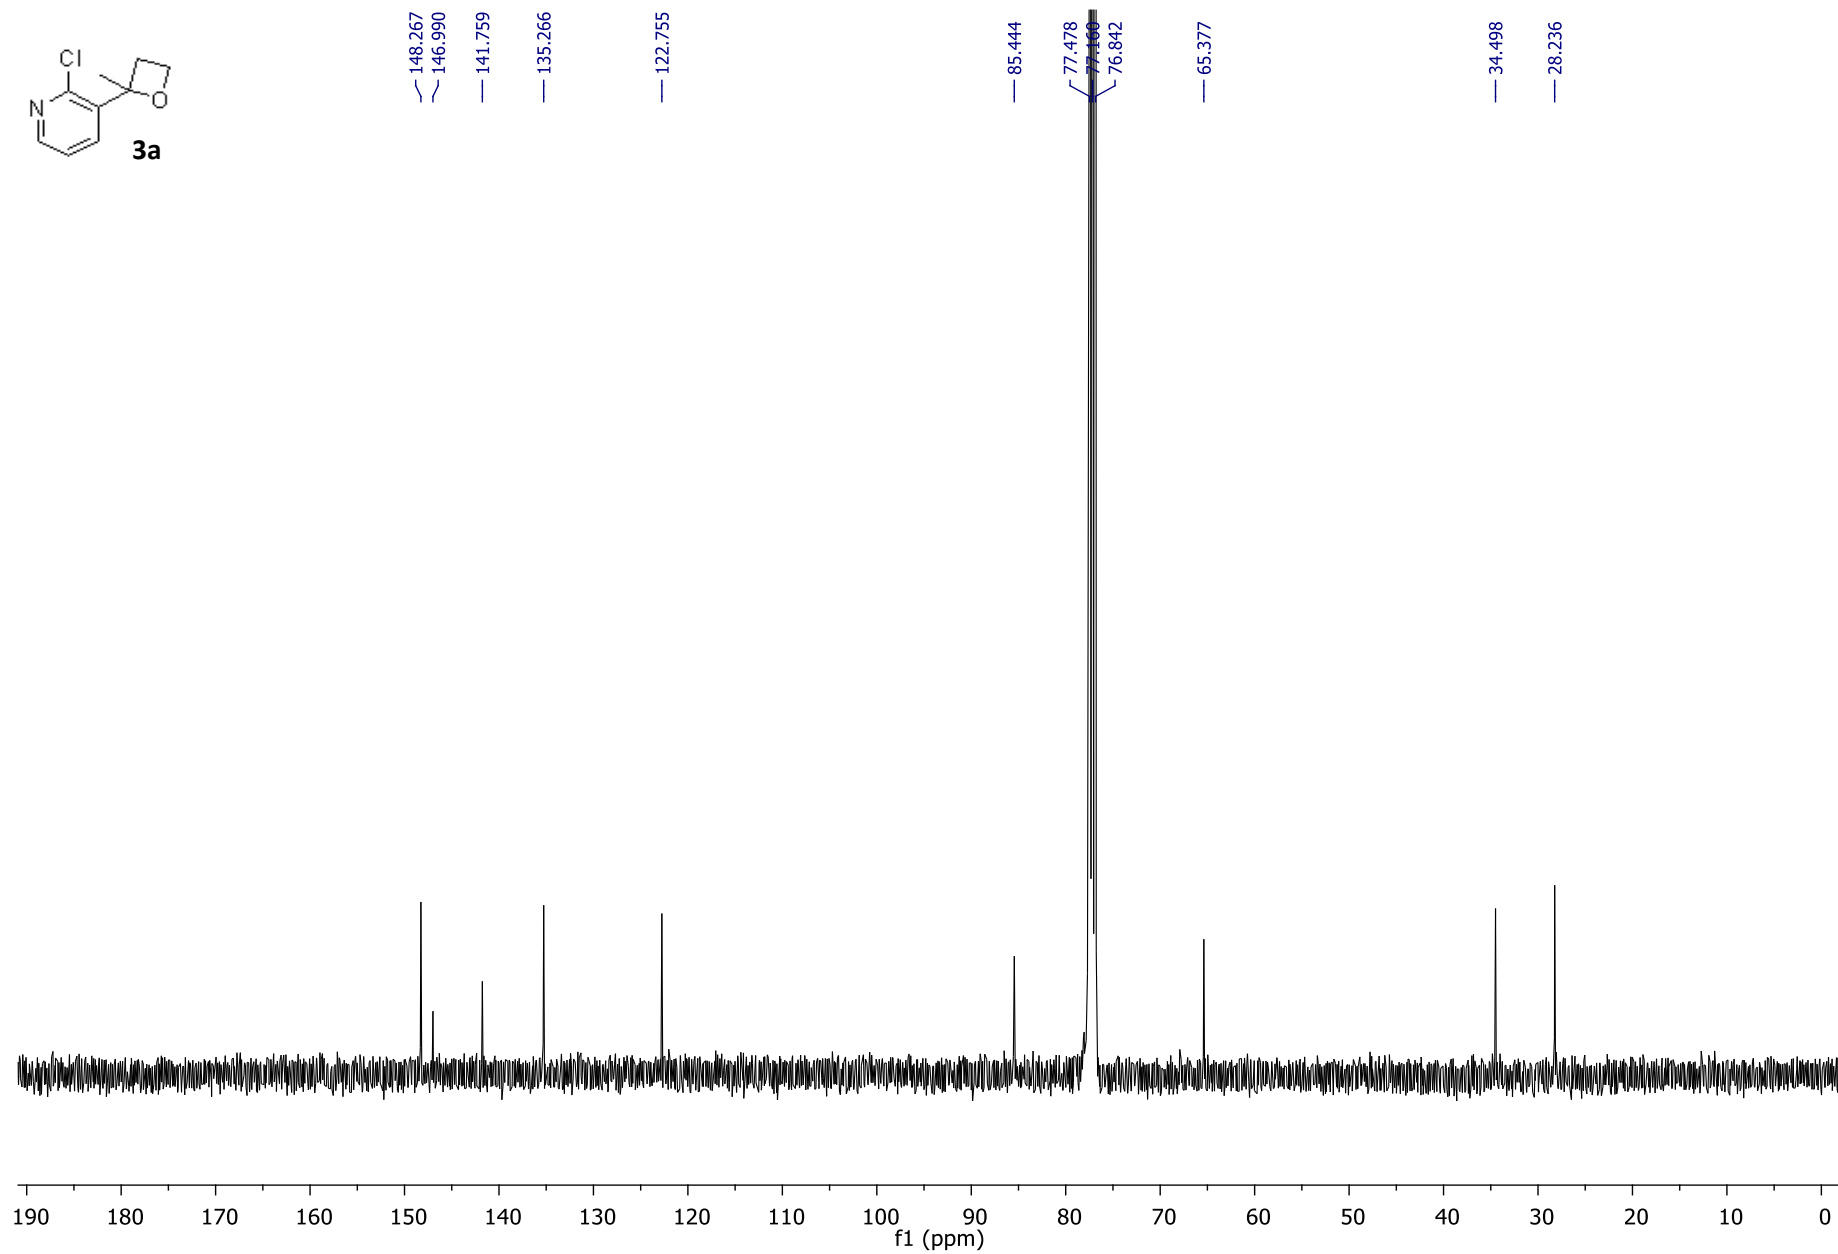

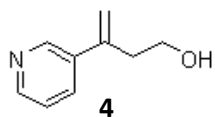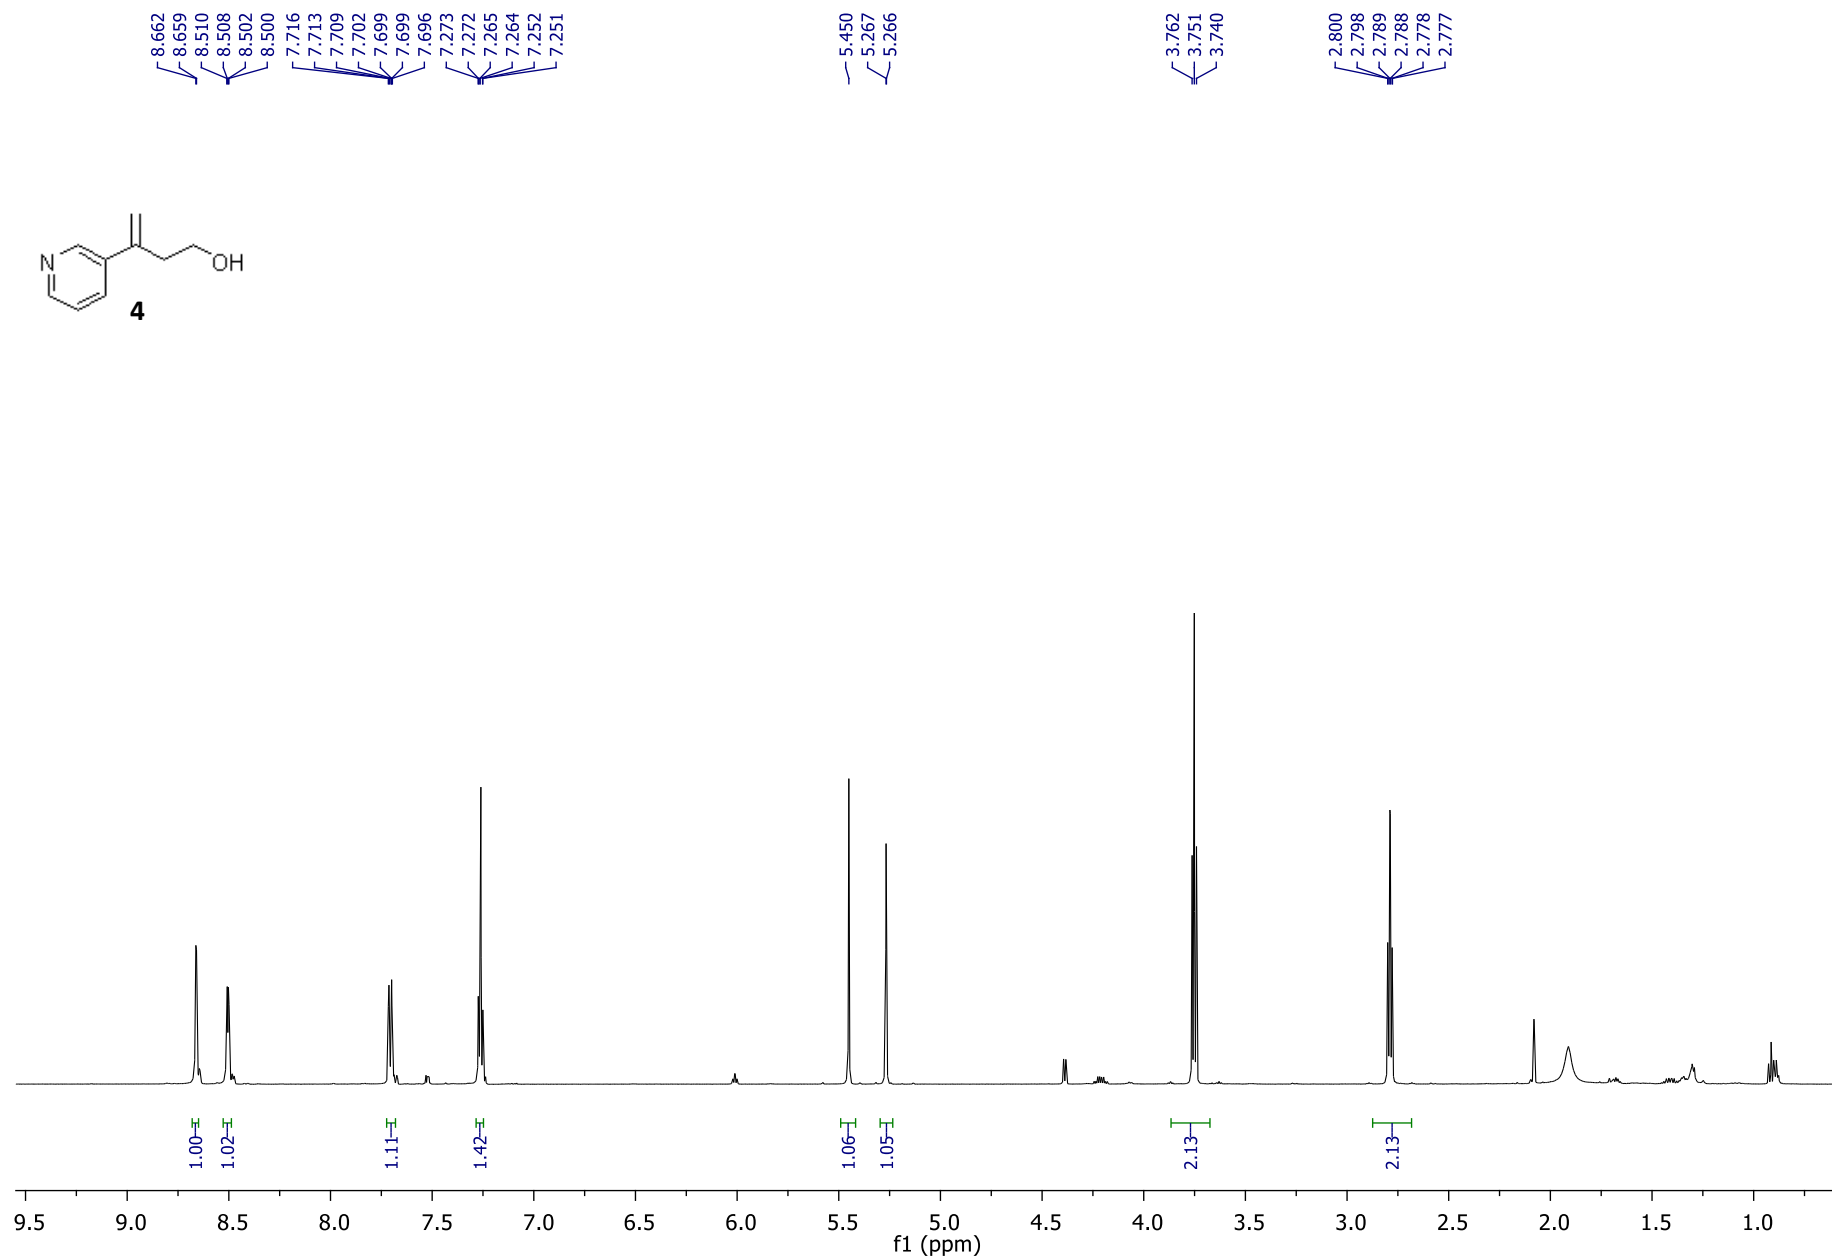

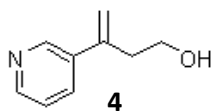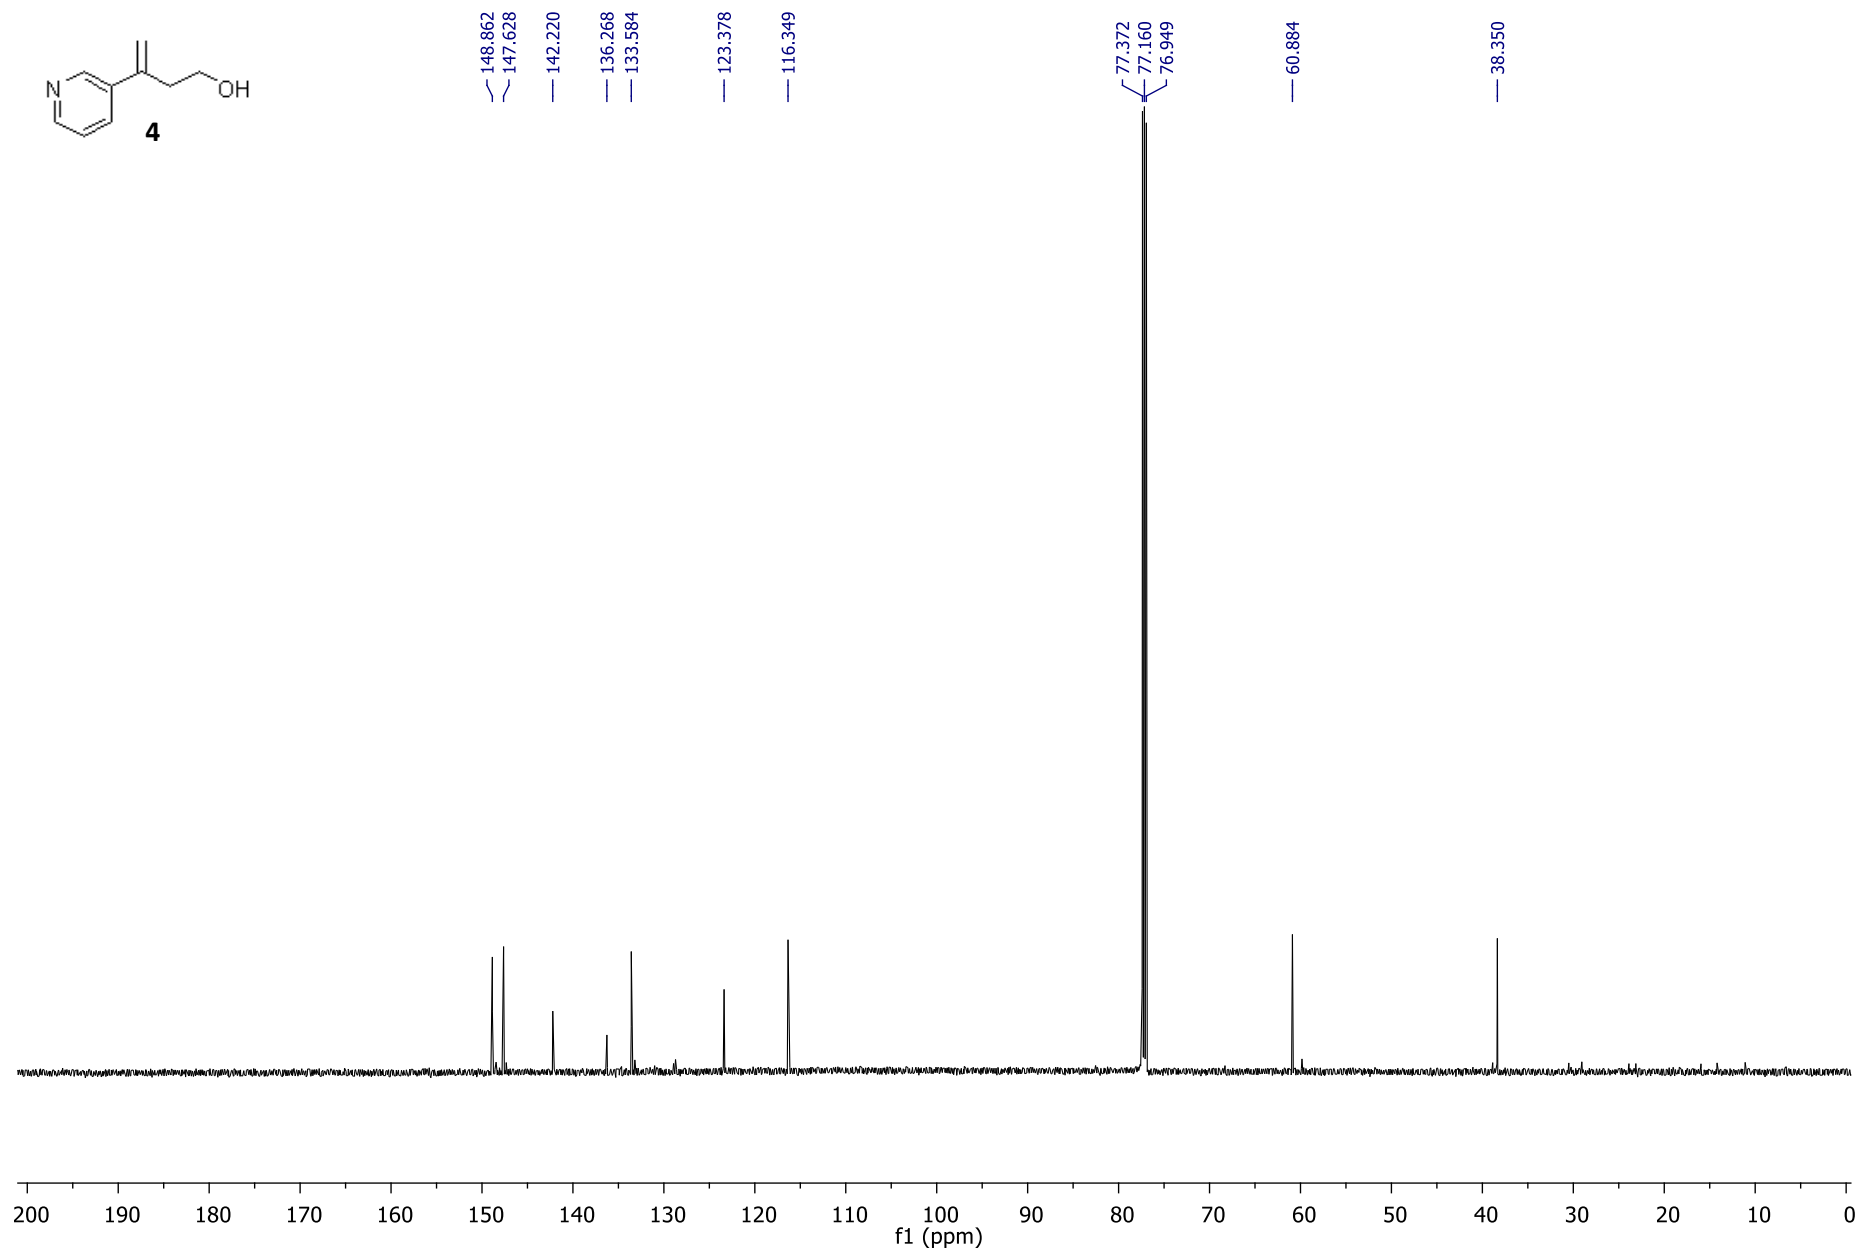

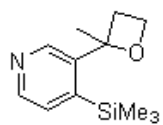

**2b**

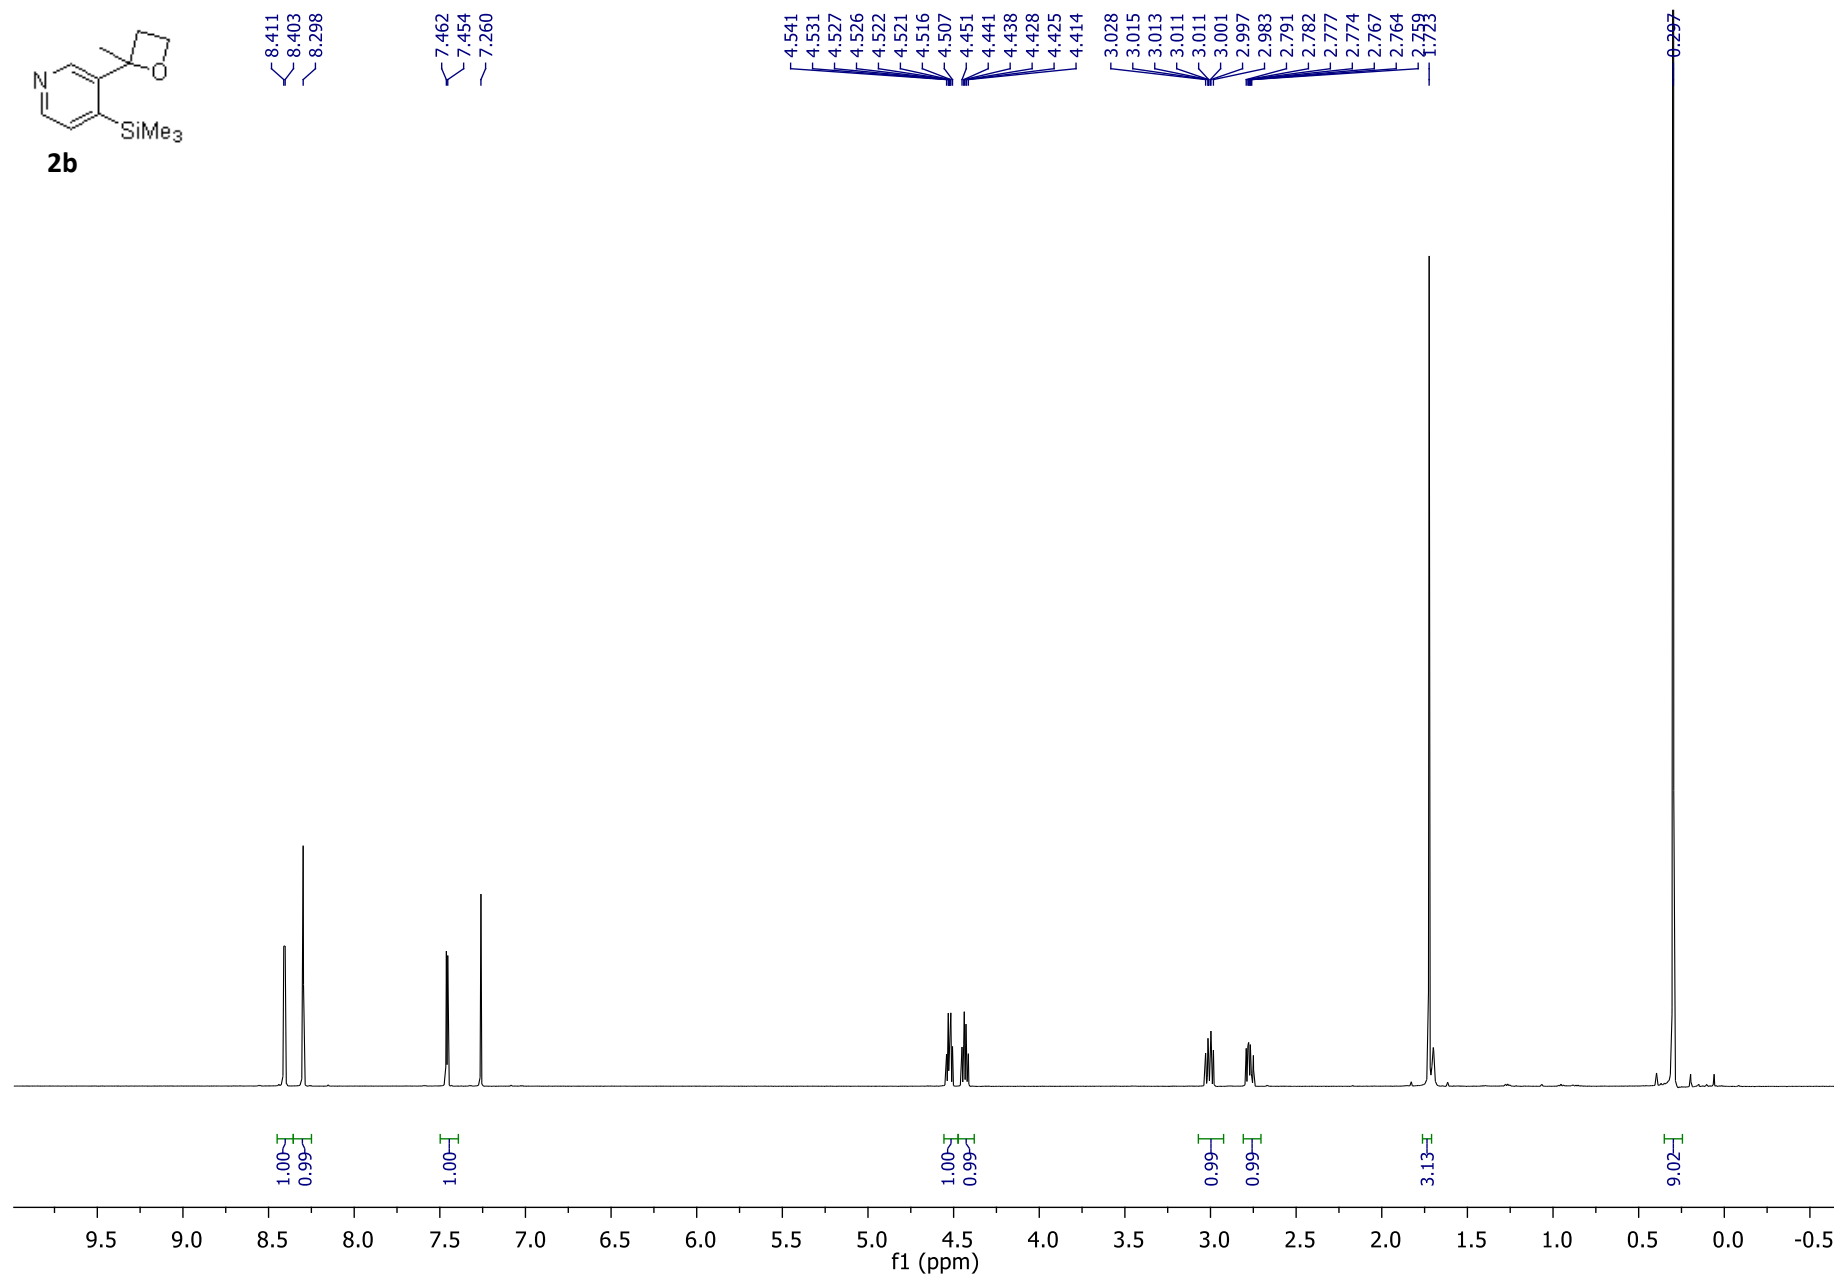



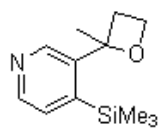

**2b**

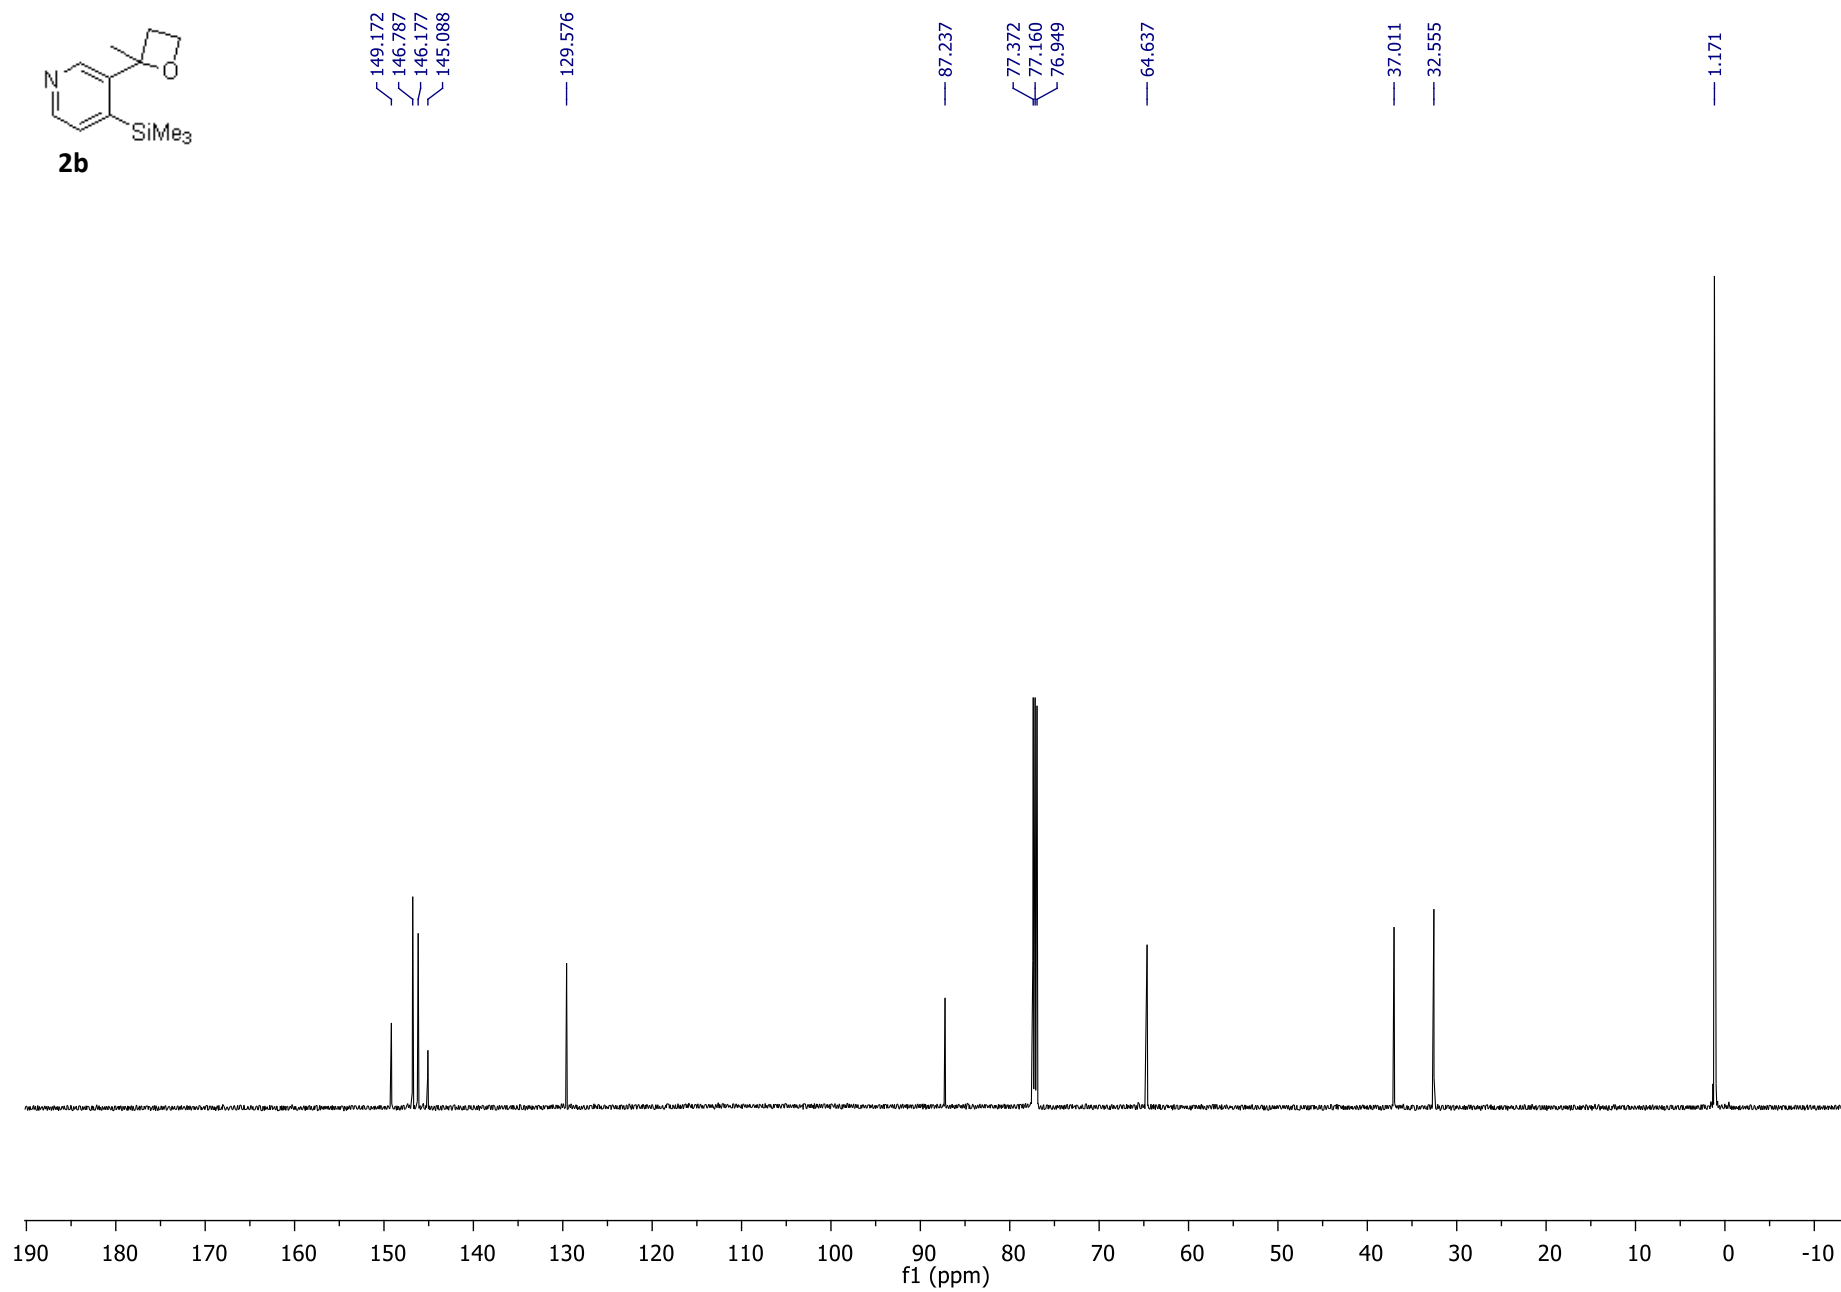

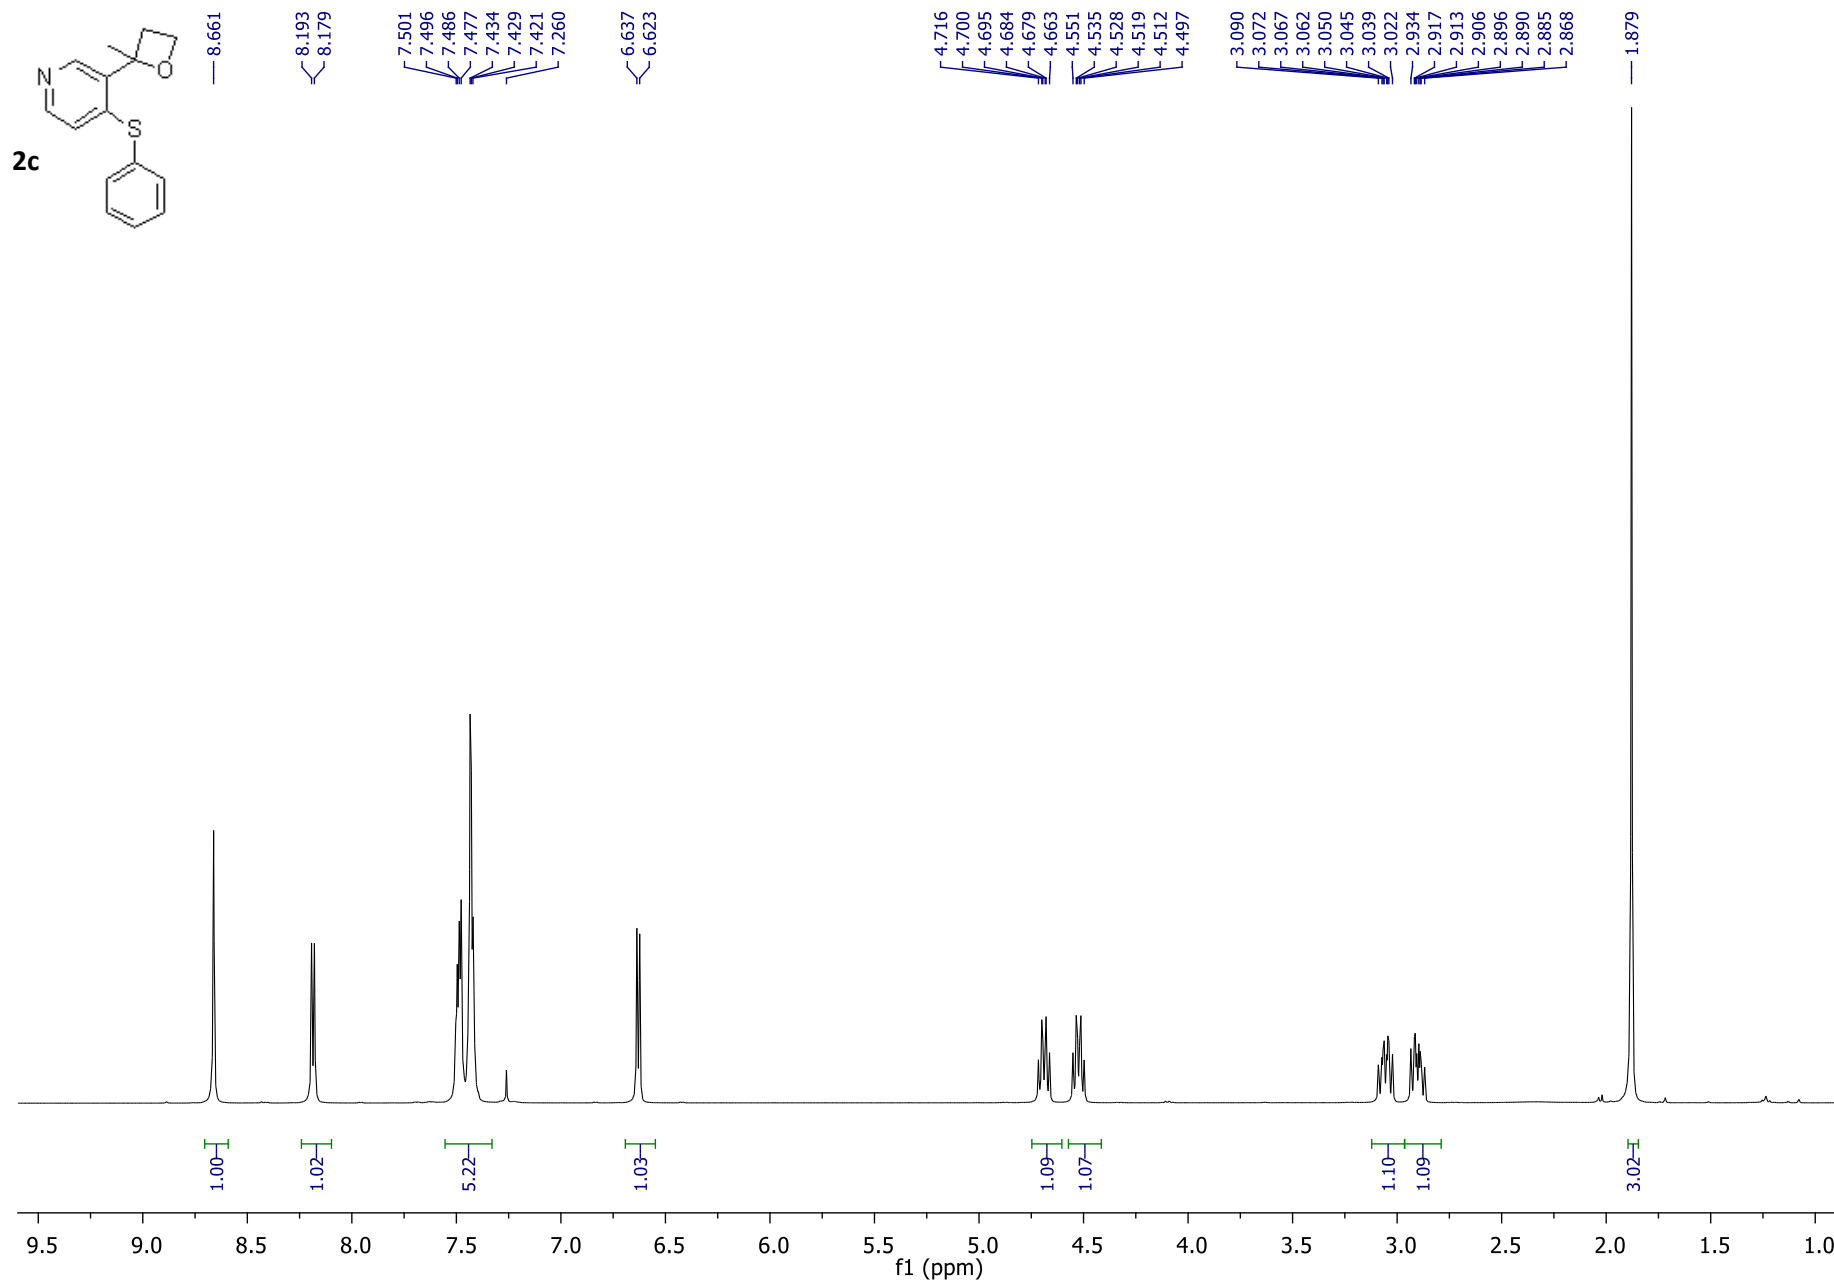

2c

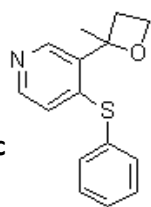

148.157  
145.823  
145.147  
138.975  
135.148  
130.075  
129.975  
129.597  
121.082

86.121

77.478  
77.160  
76.843

65.626

34.687

28.634

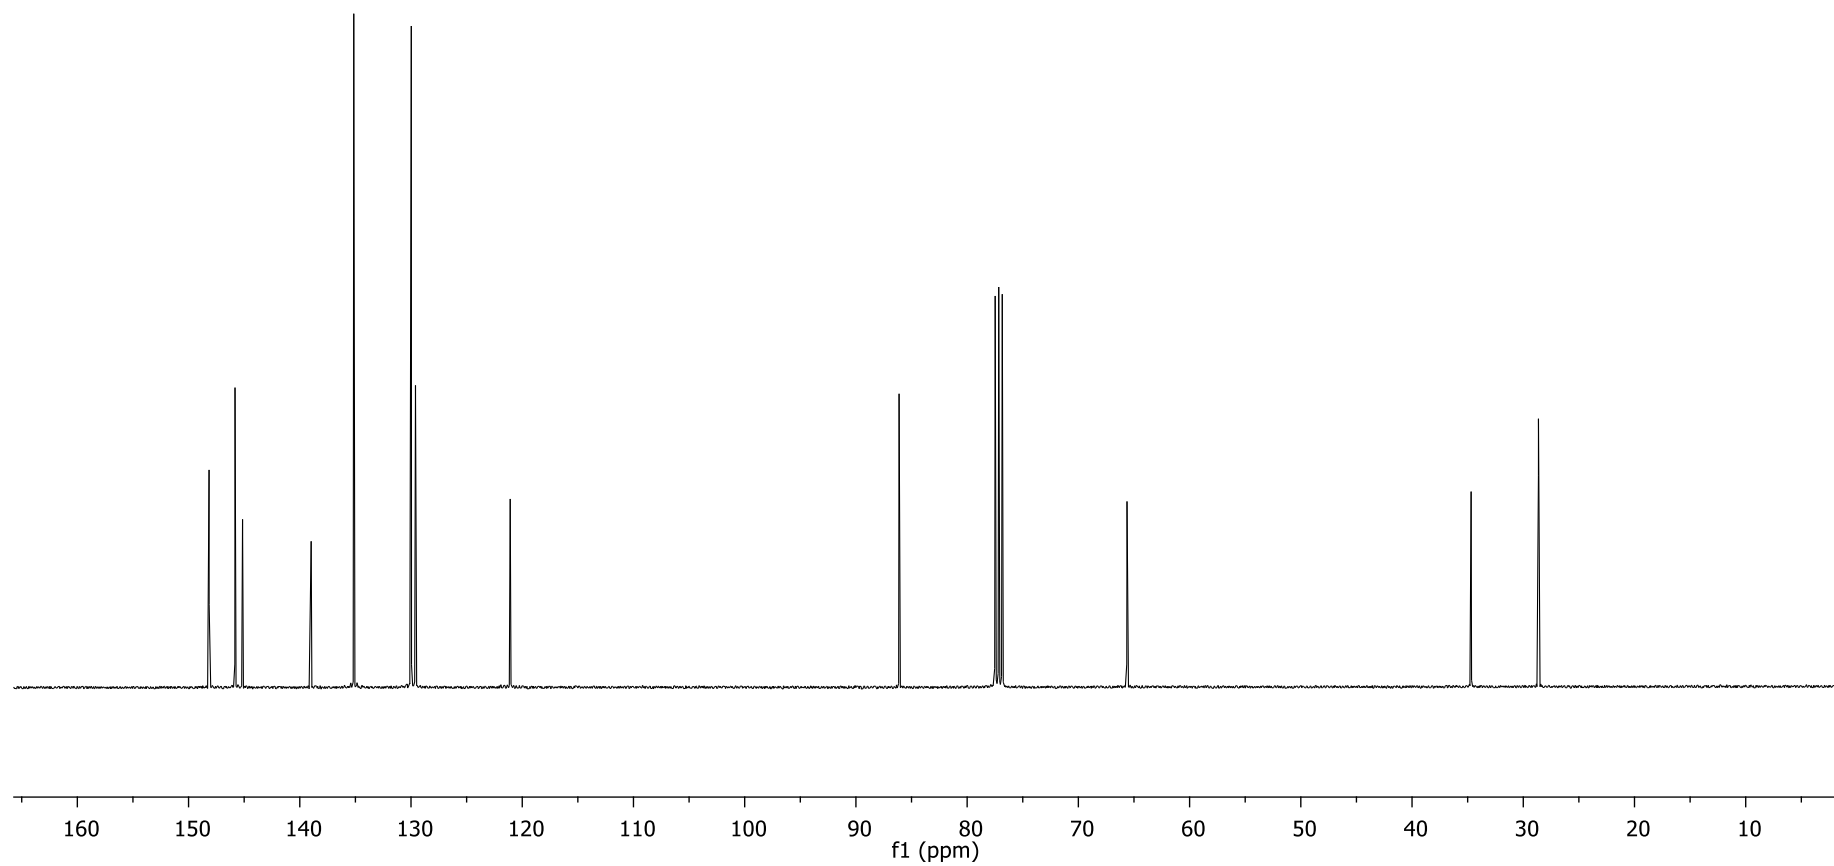

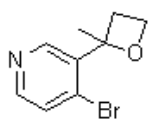

**2d**

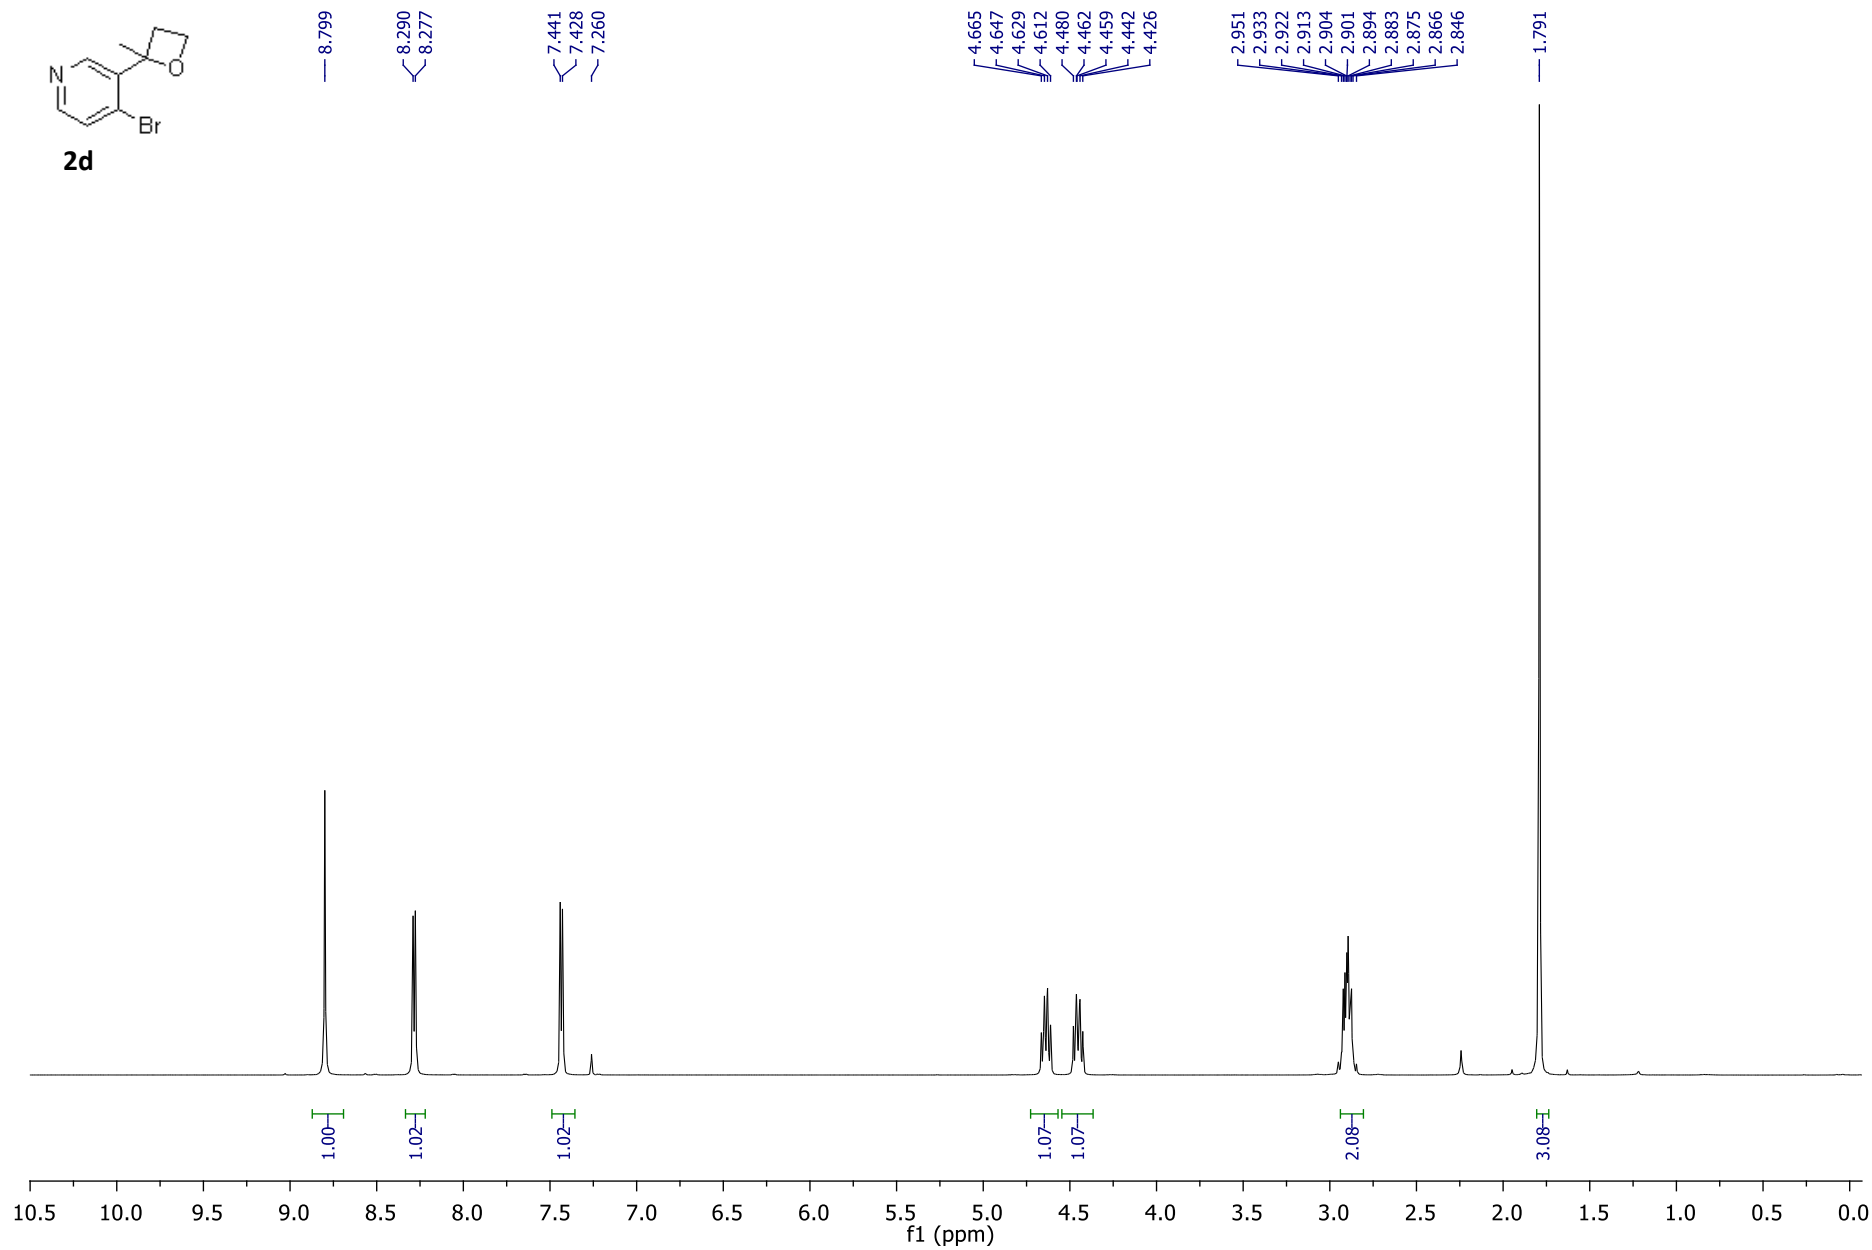

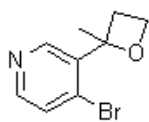

**2d**

148.986  
147.811

141.863

129.200  
128.098

86.568

77.477  
77.160  
76.842

65.553

34.891

28.573

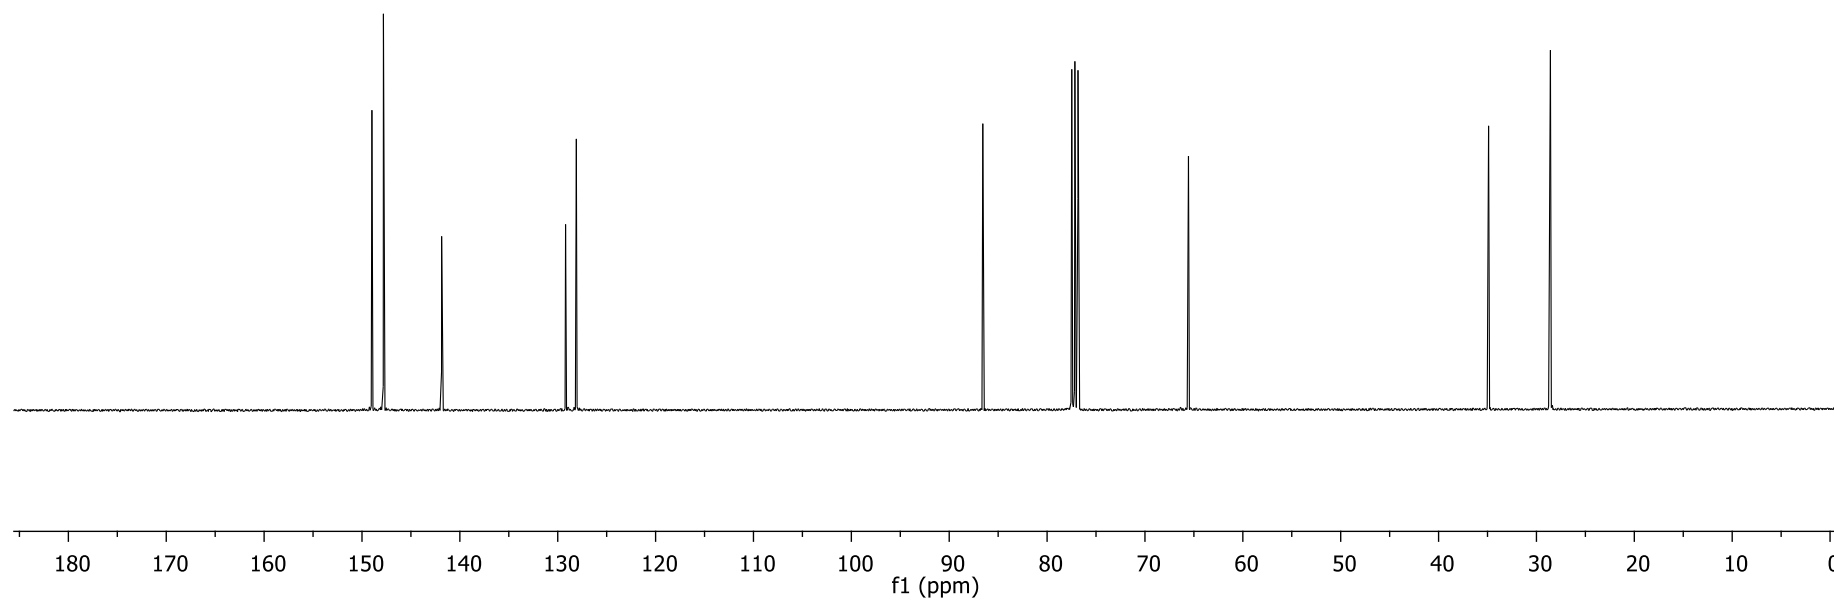

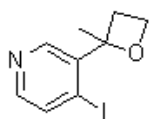

**2e**

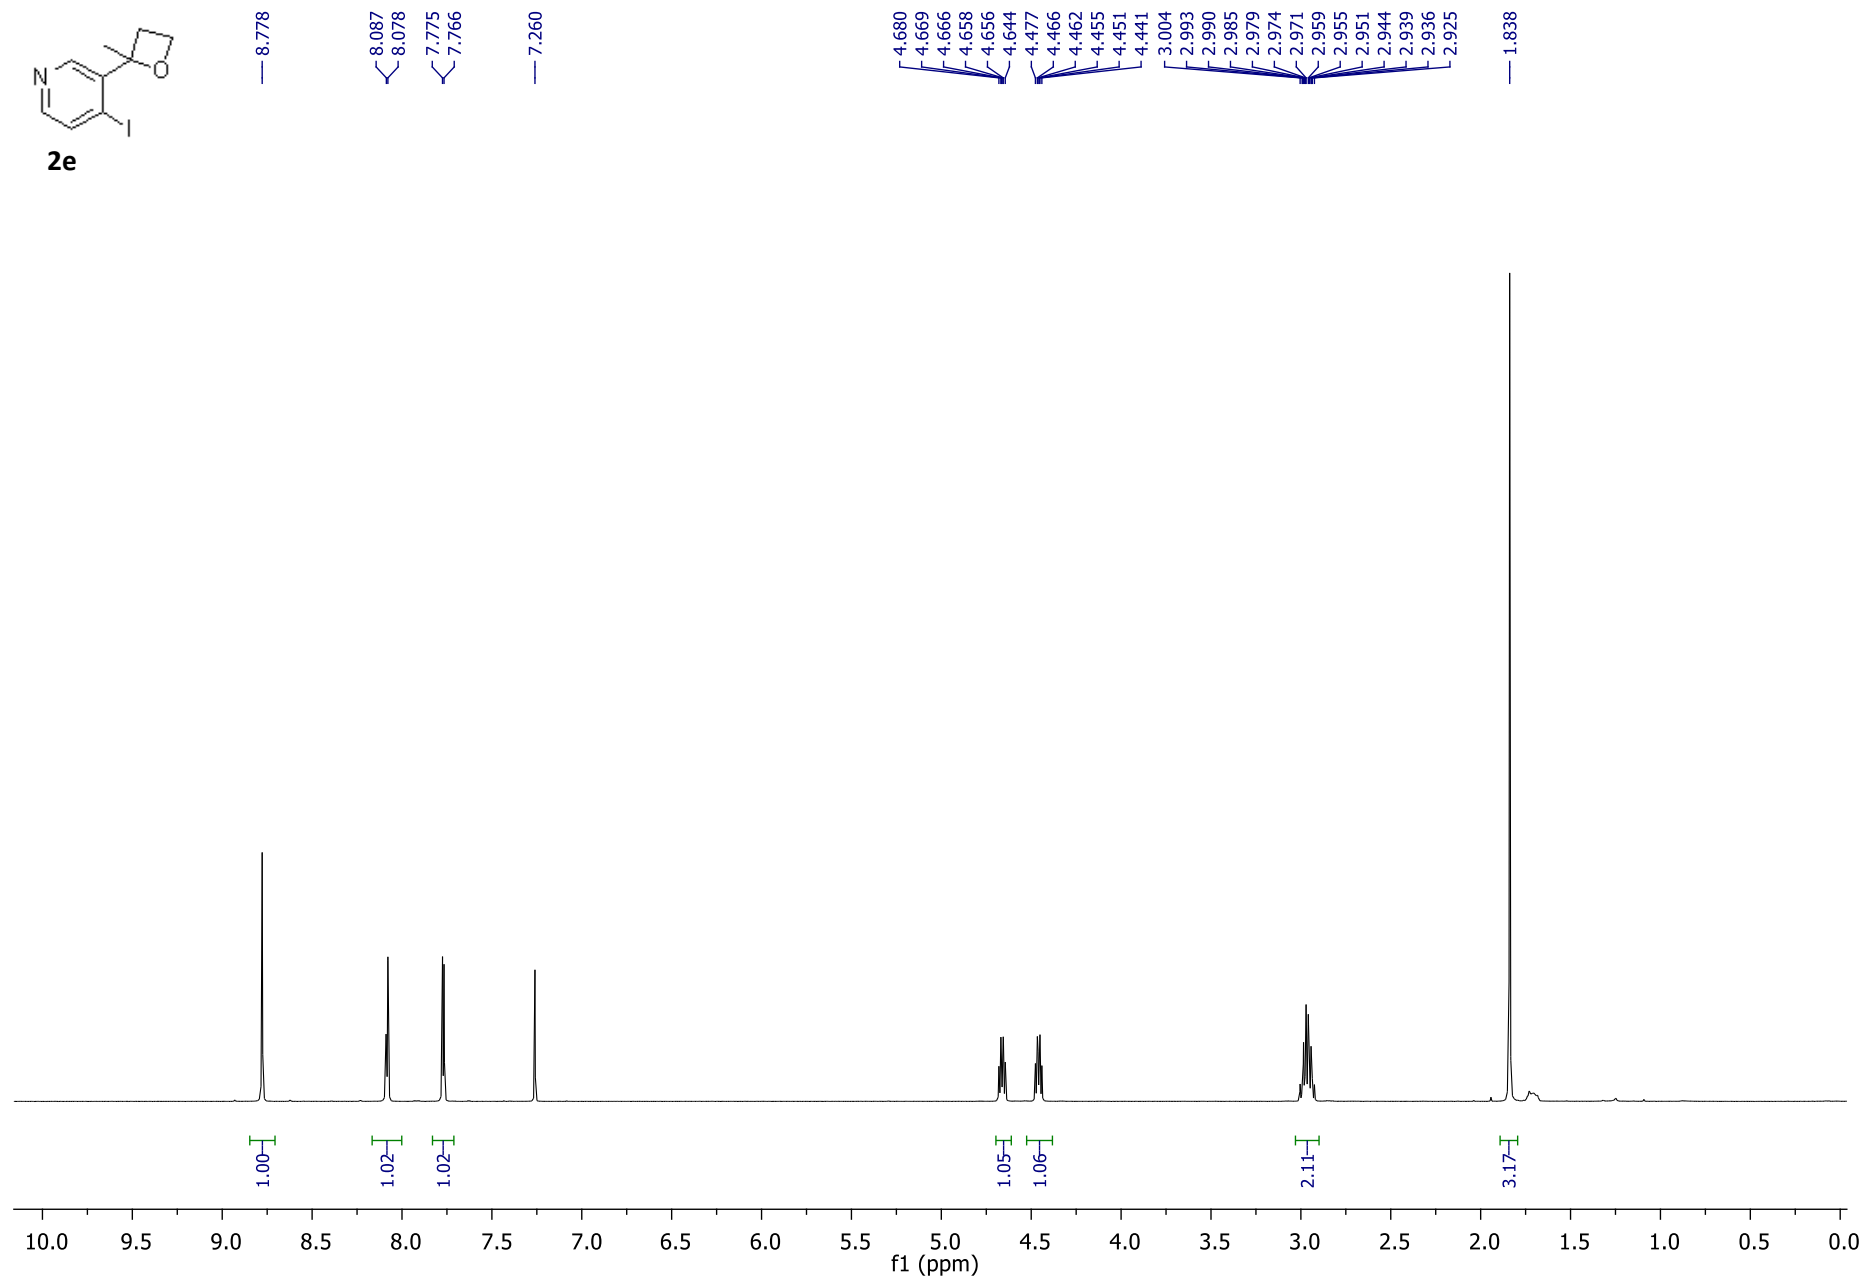

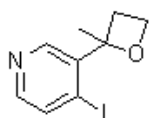

**2e**

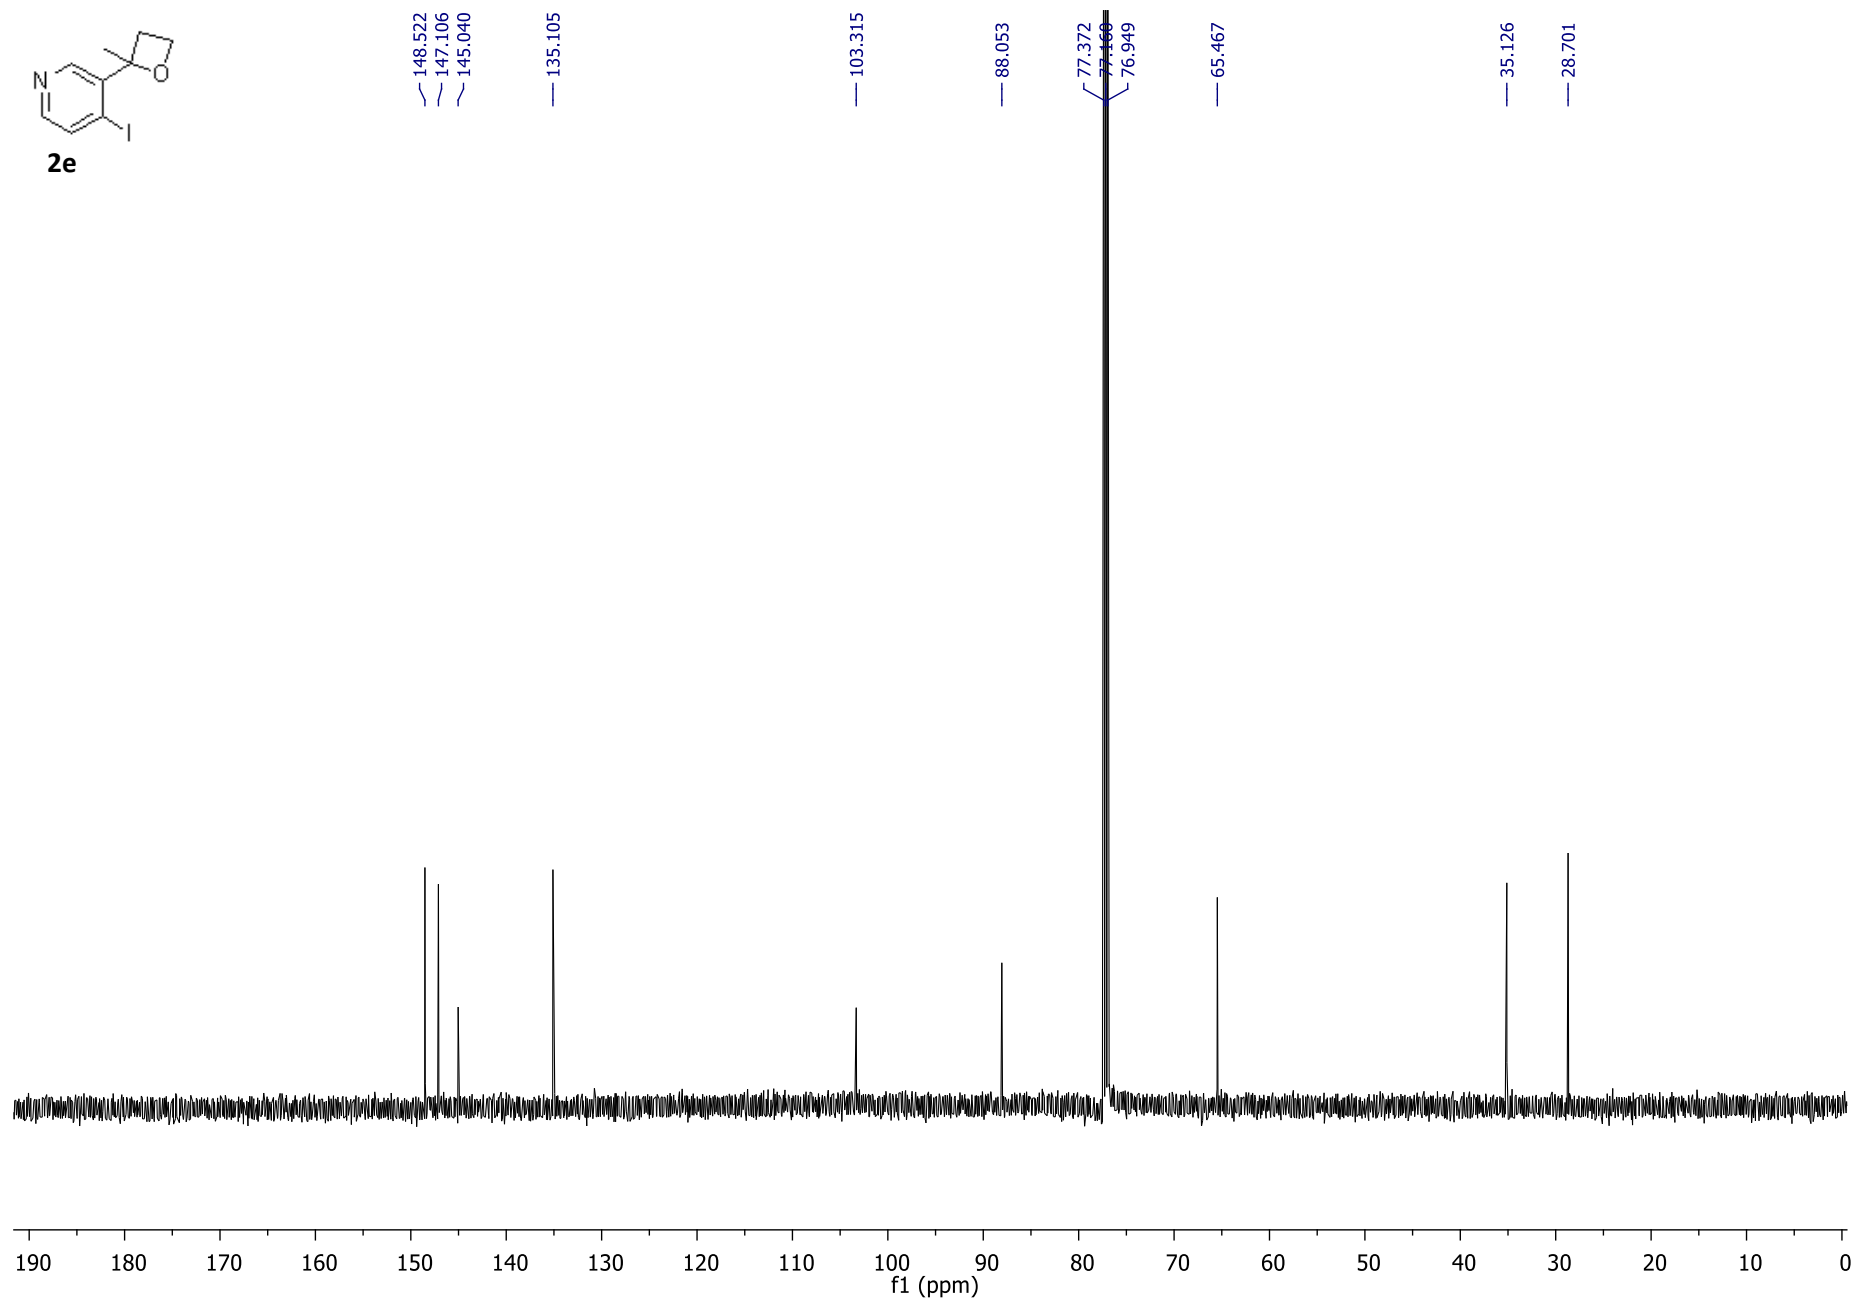

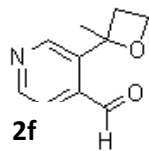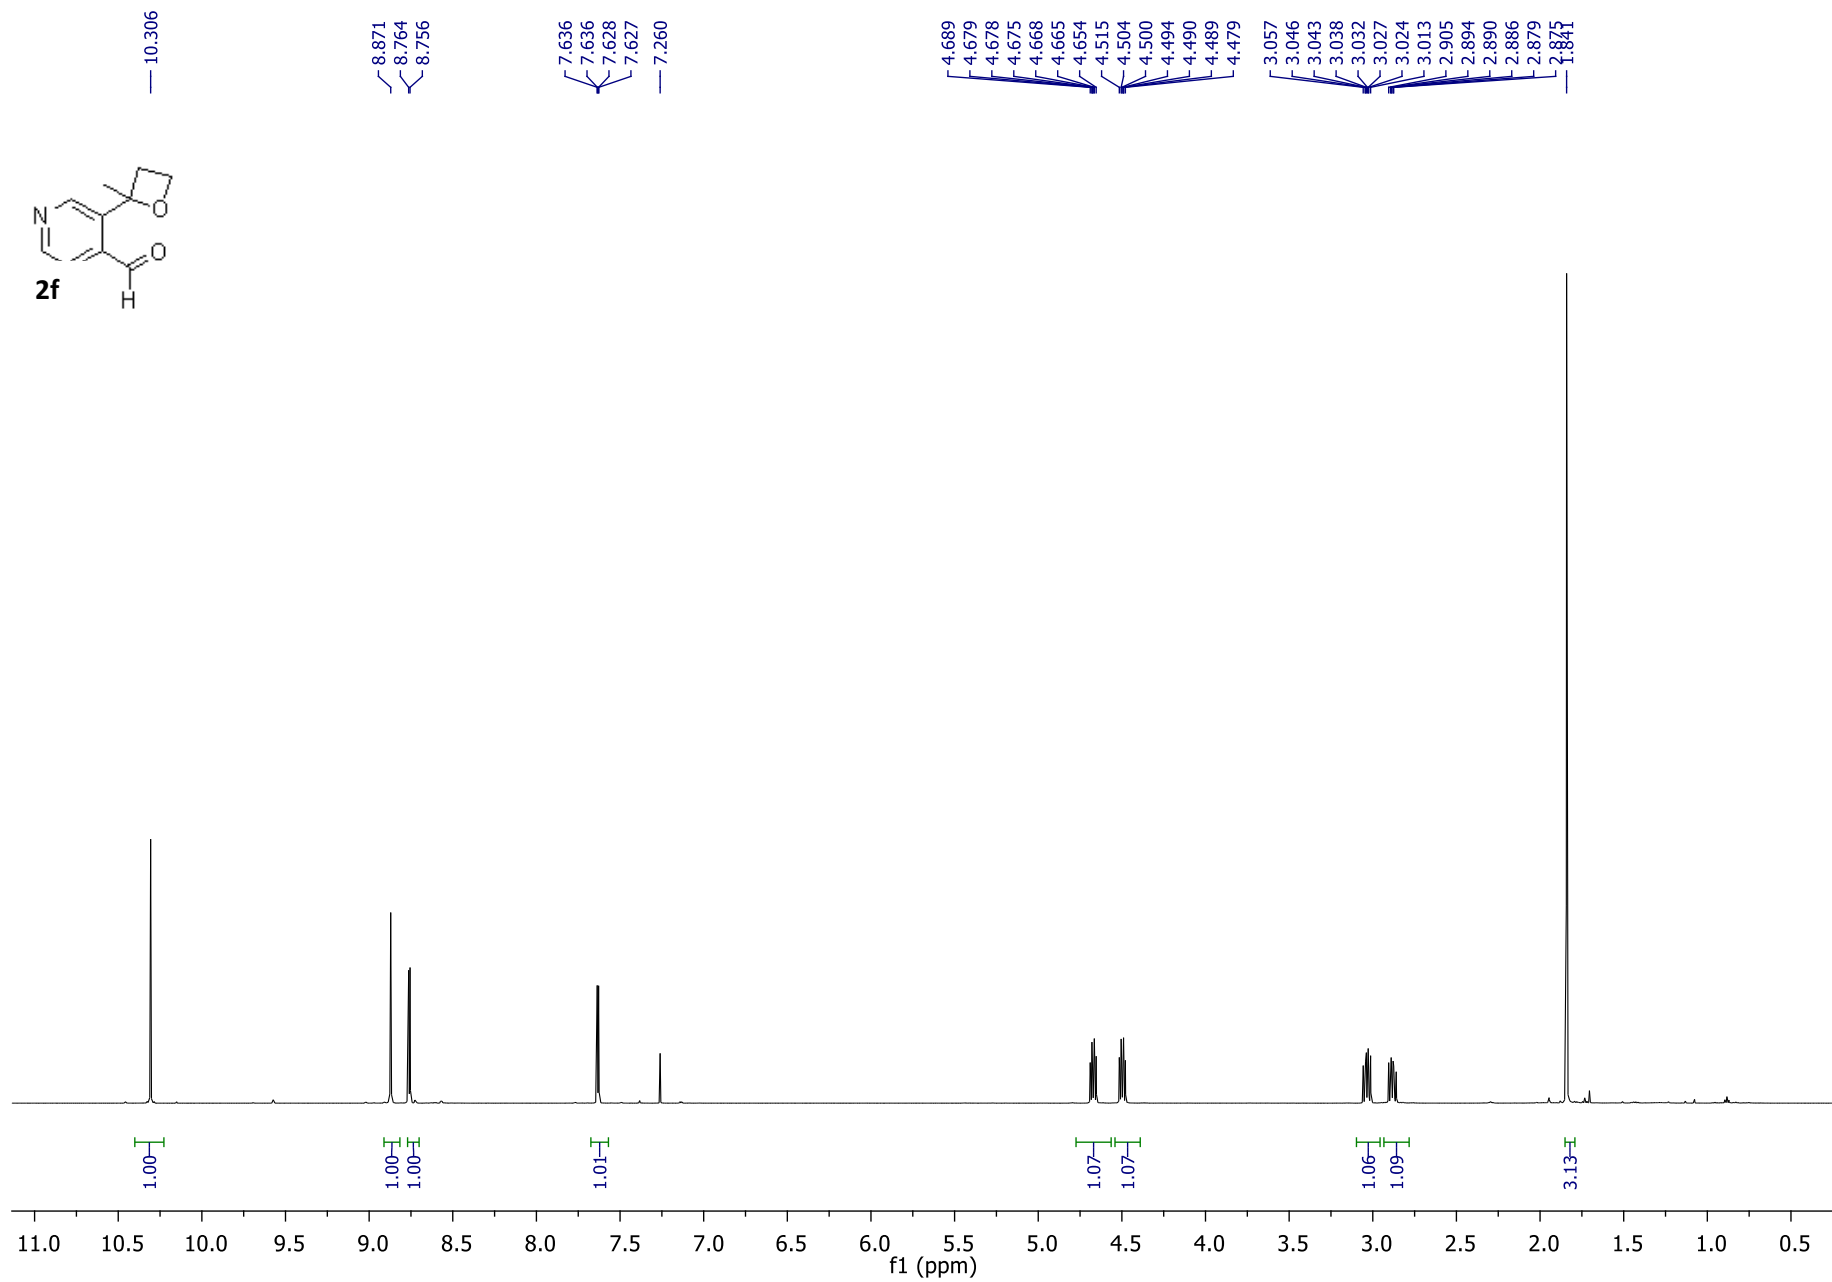



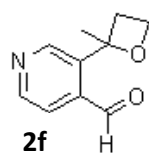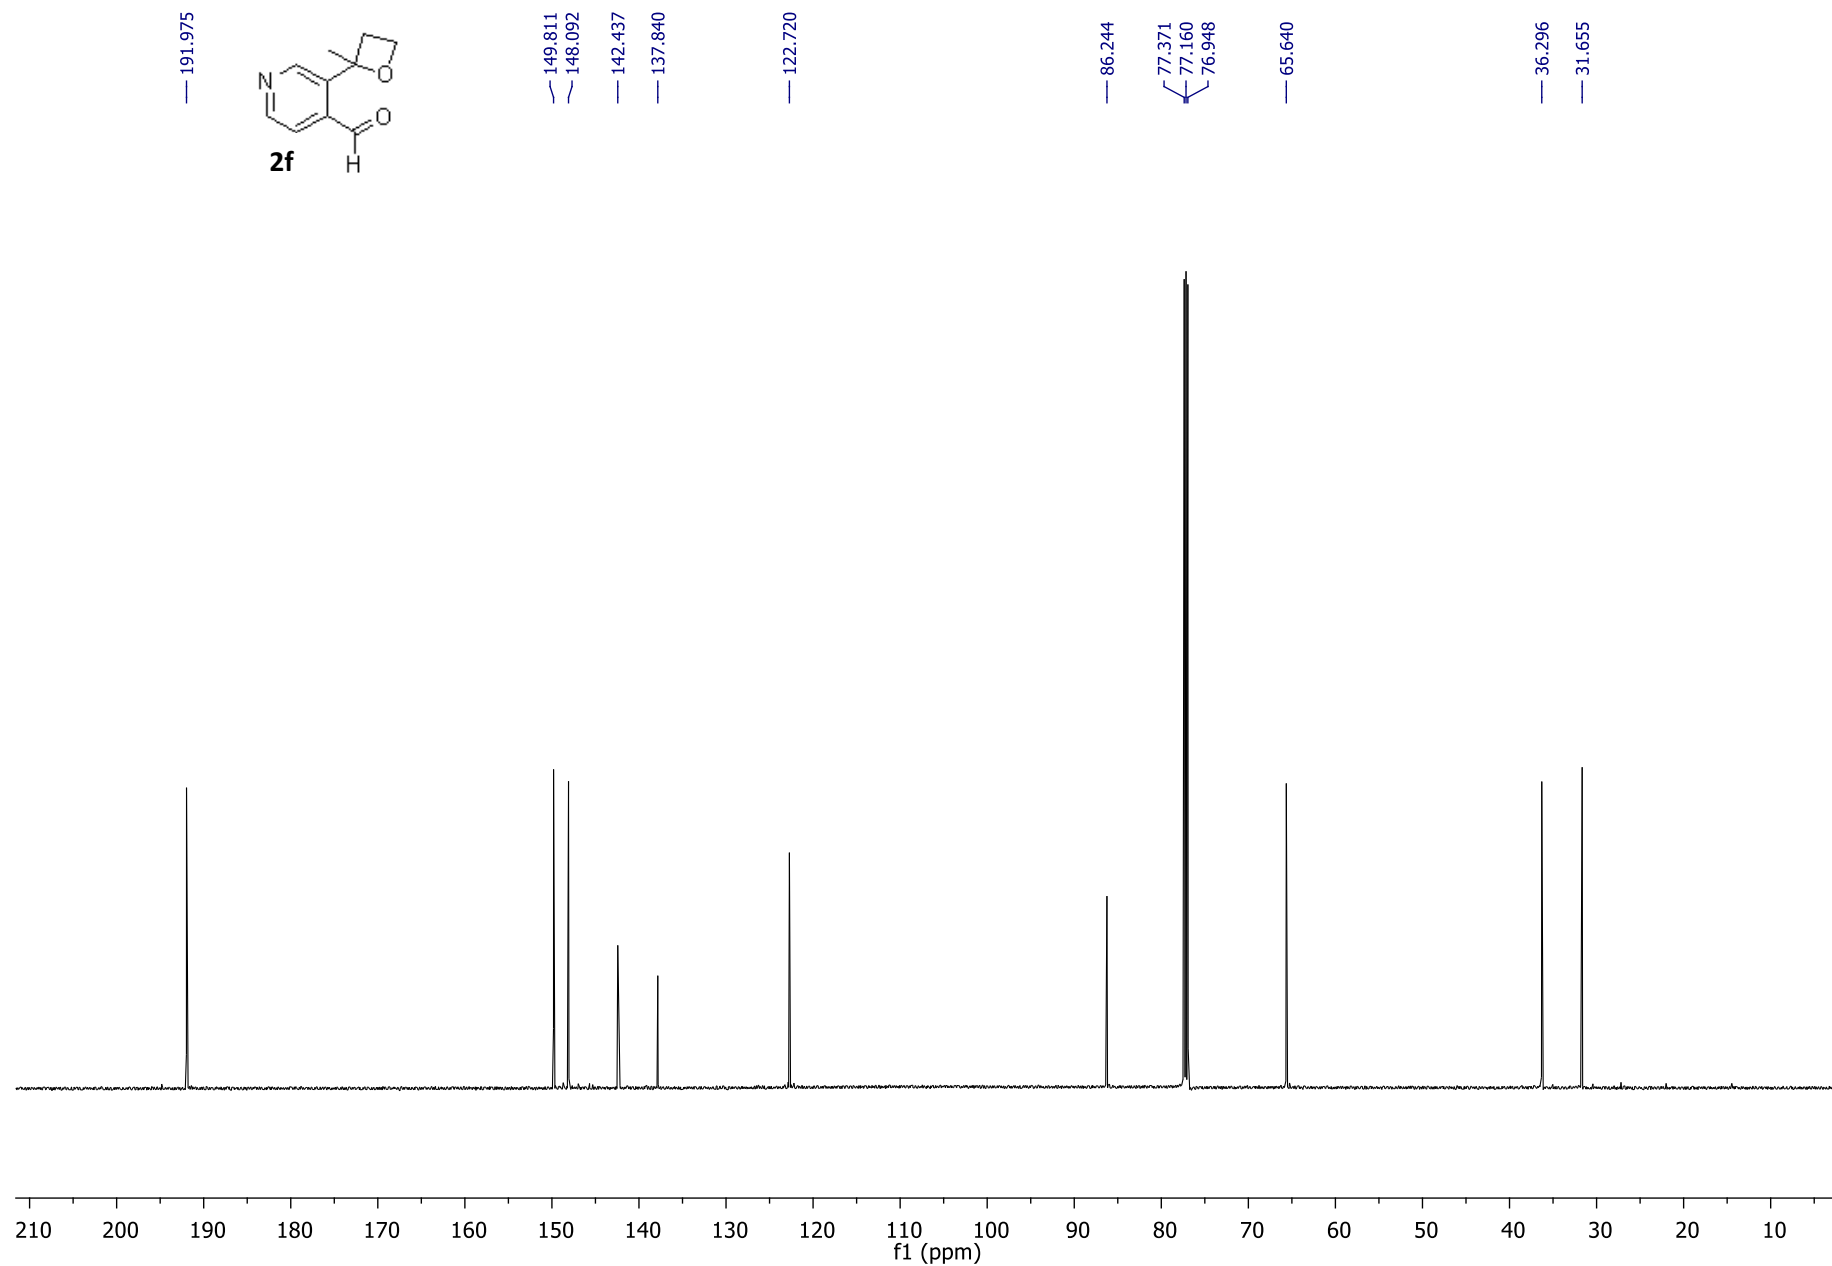

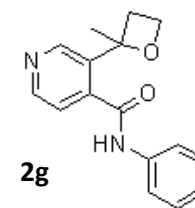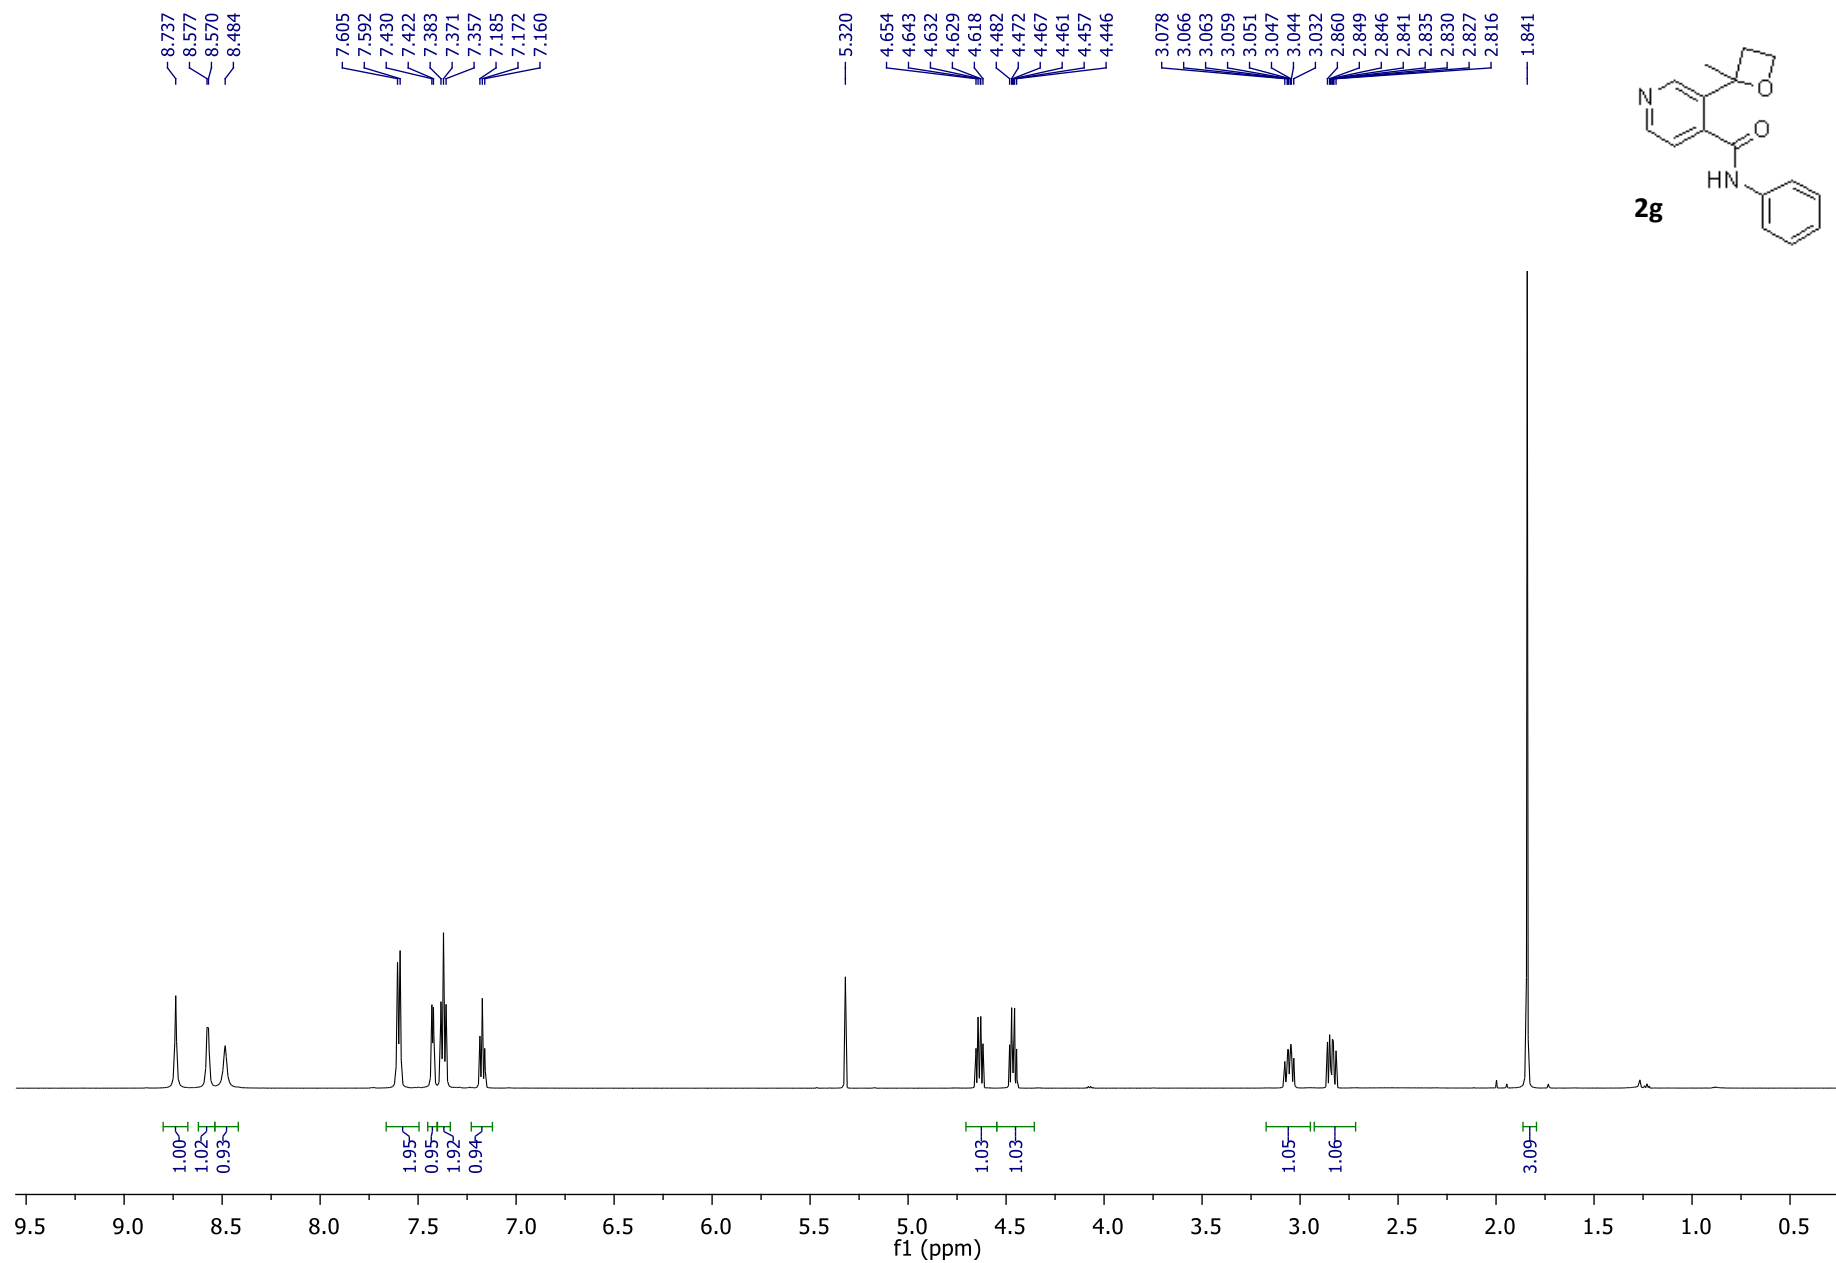

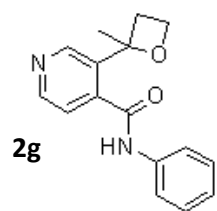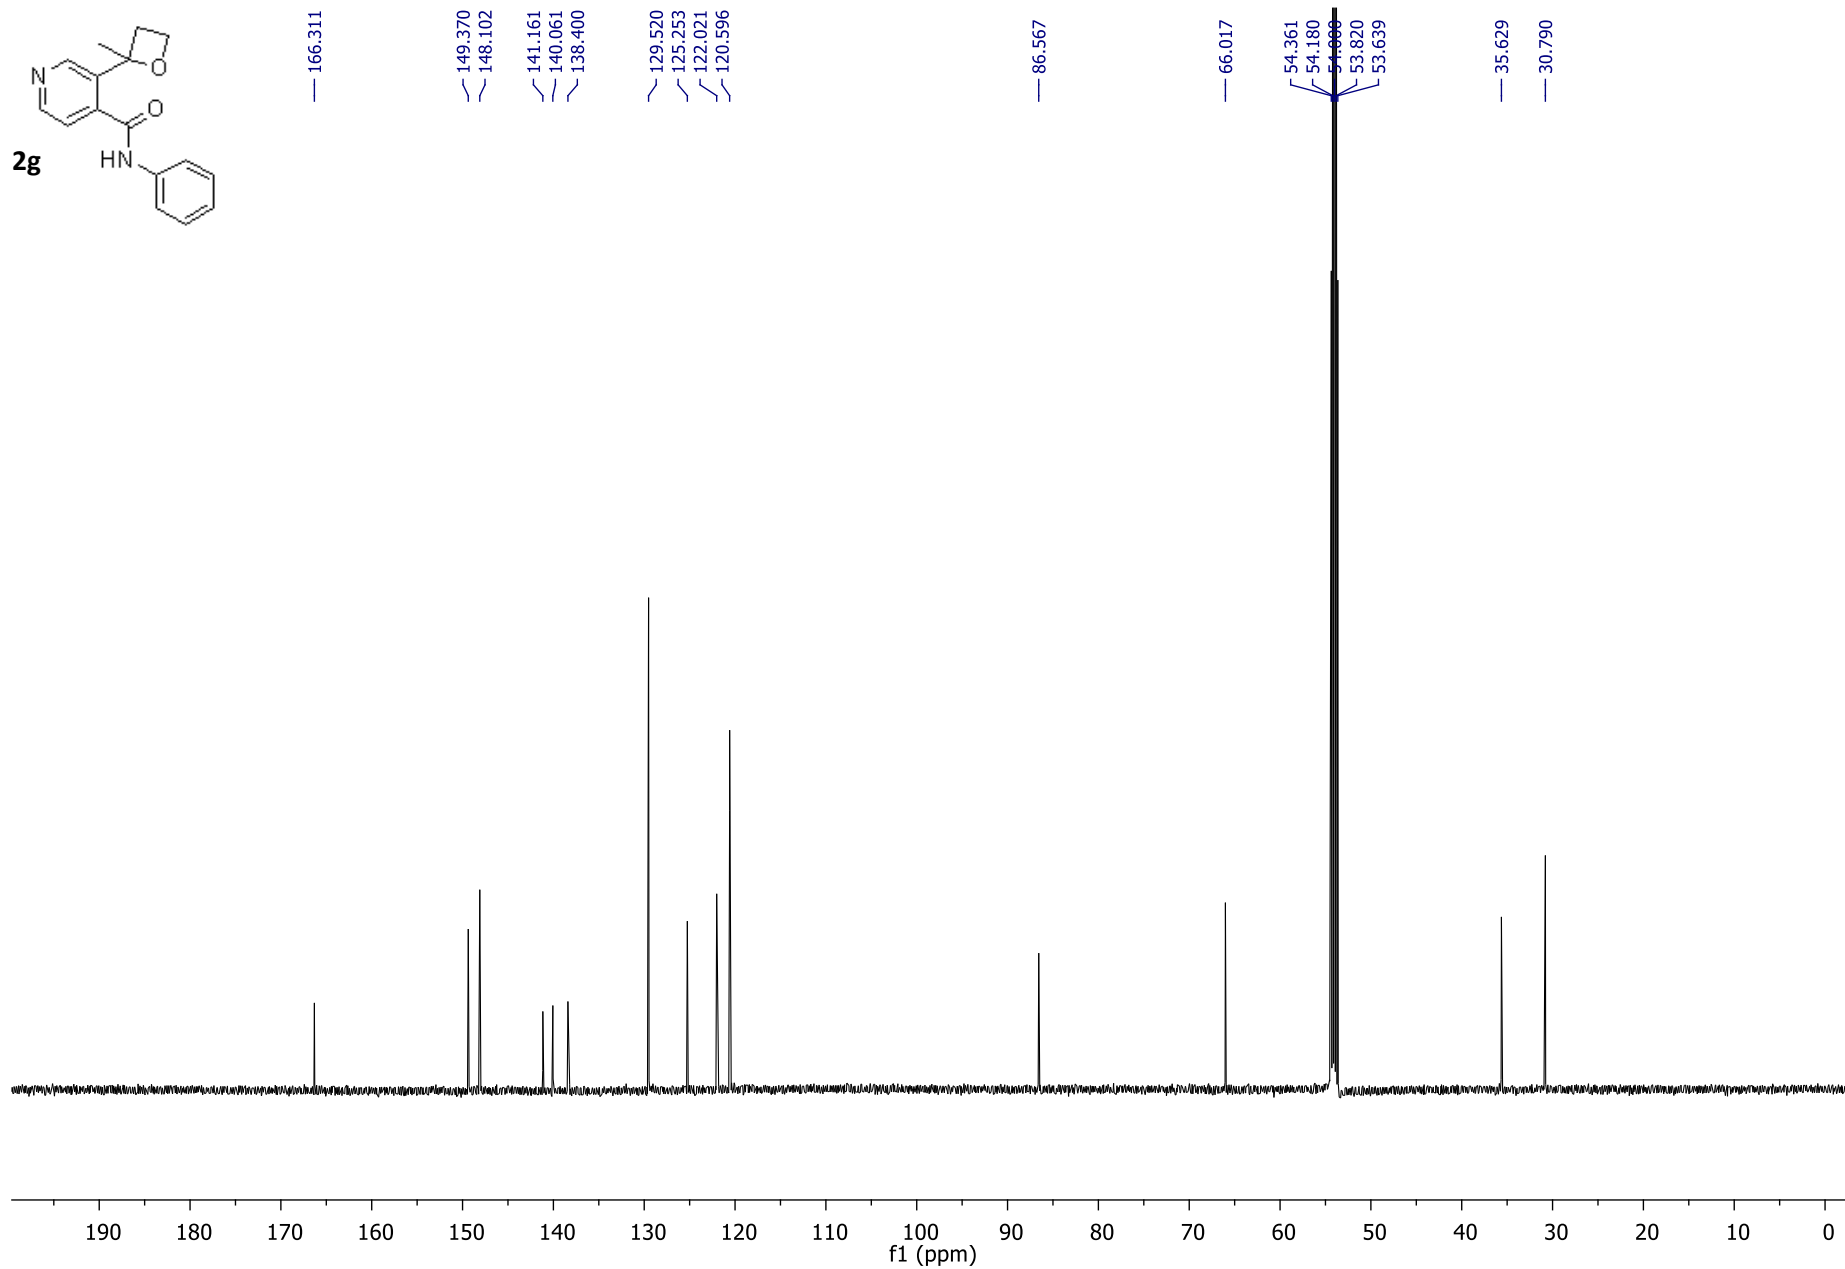

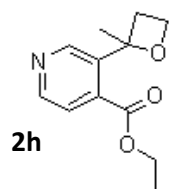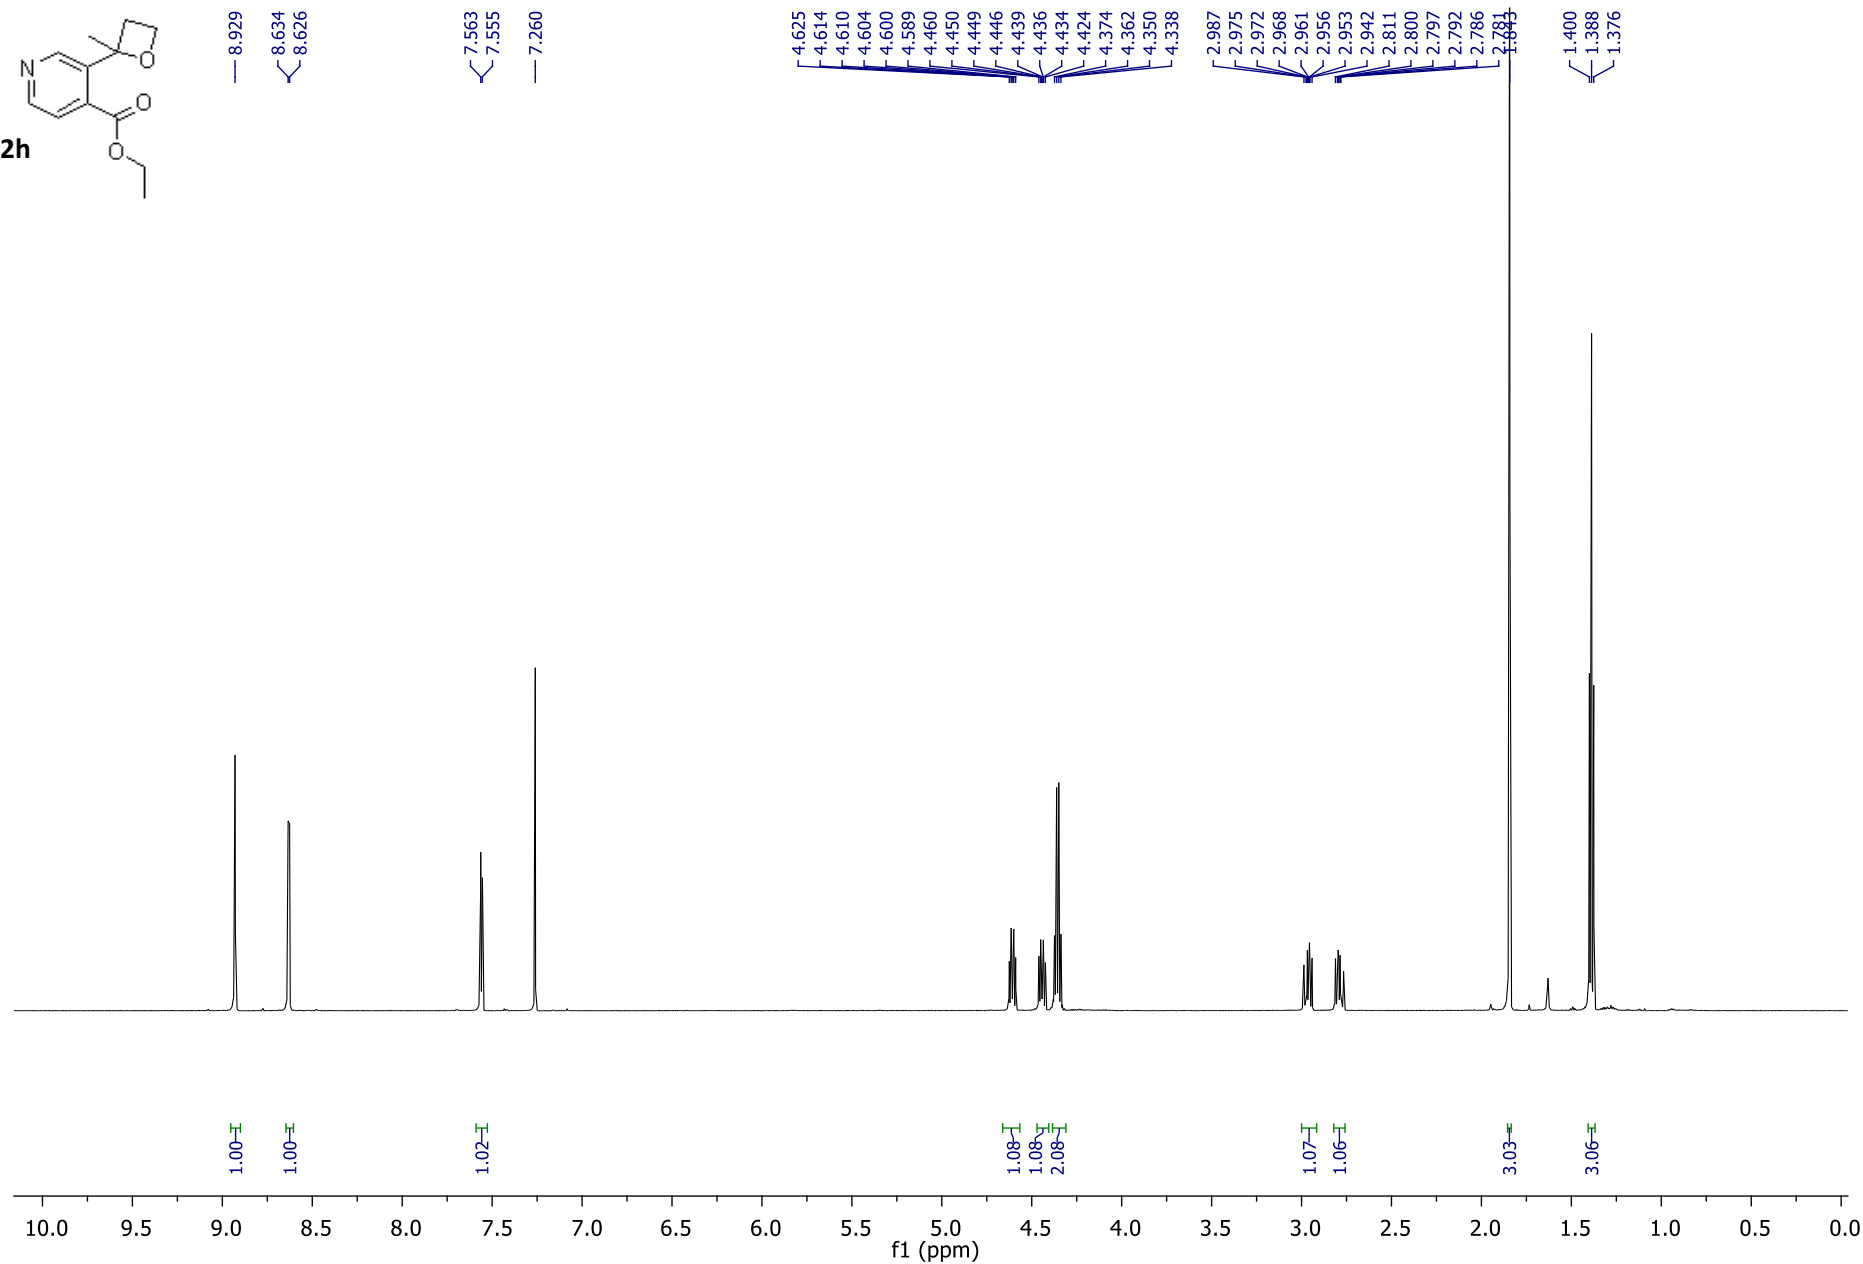

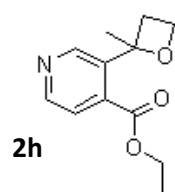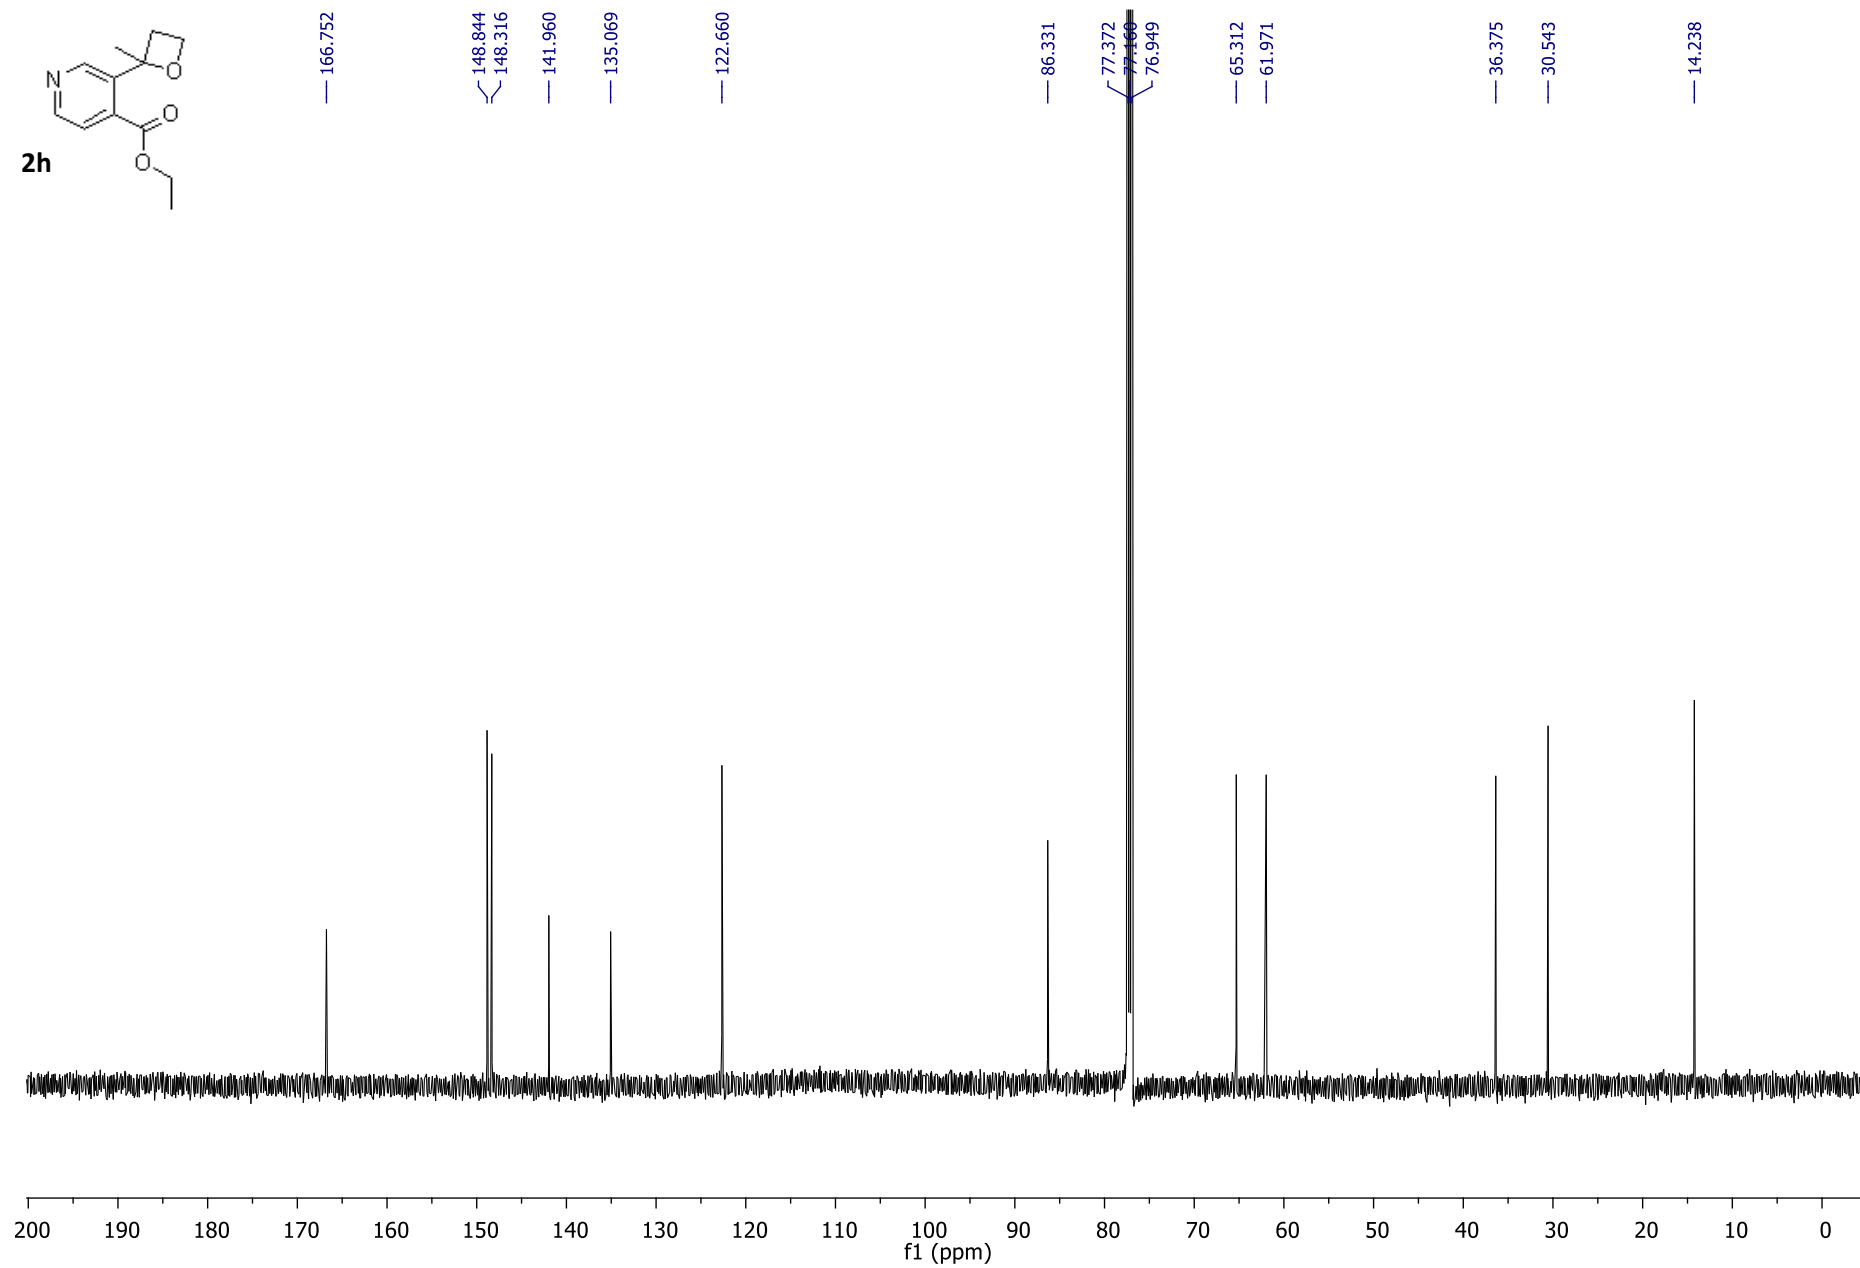

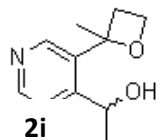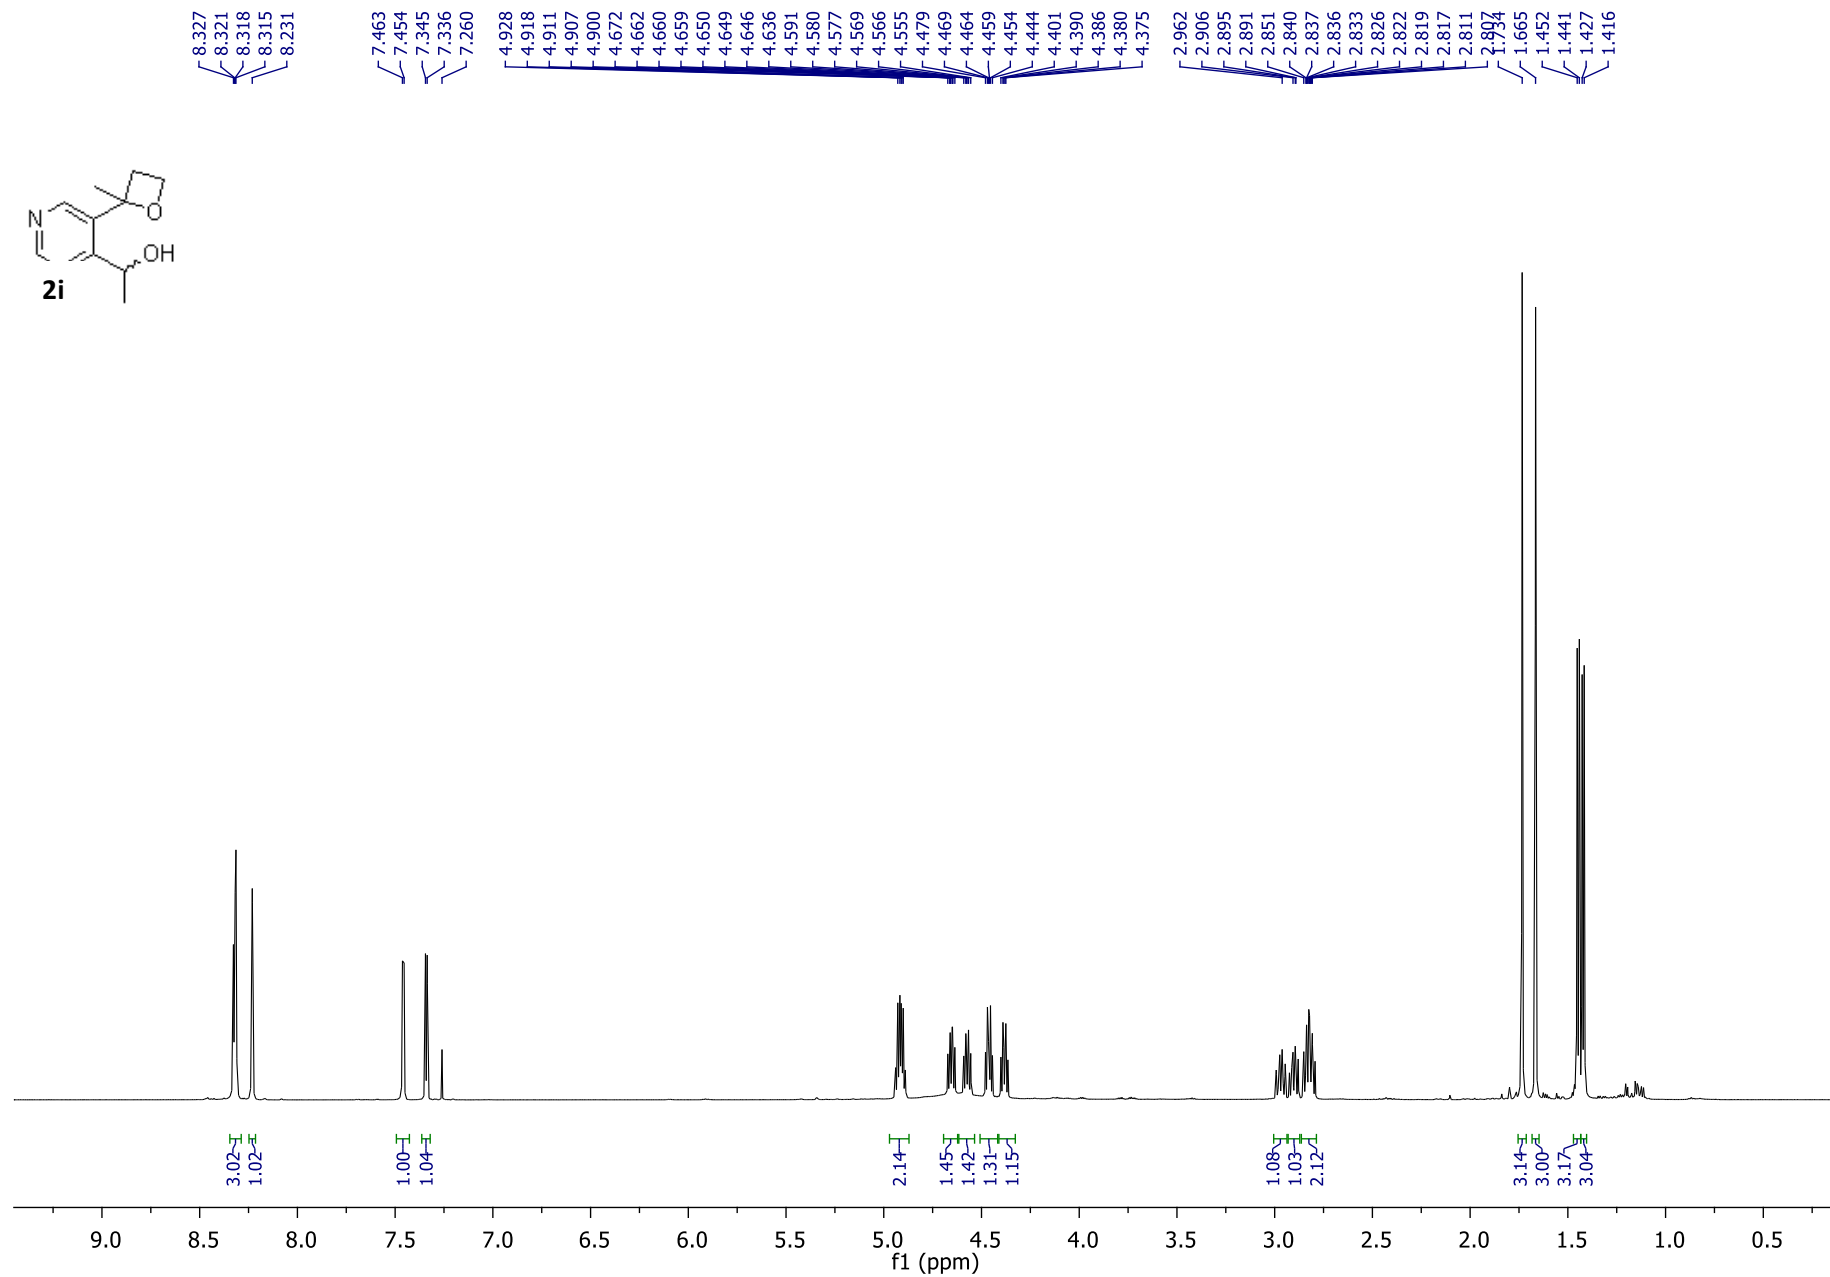

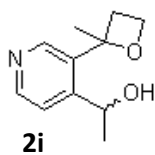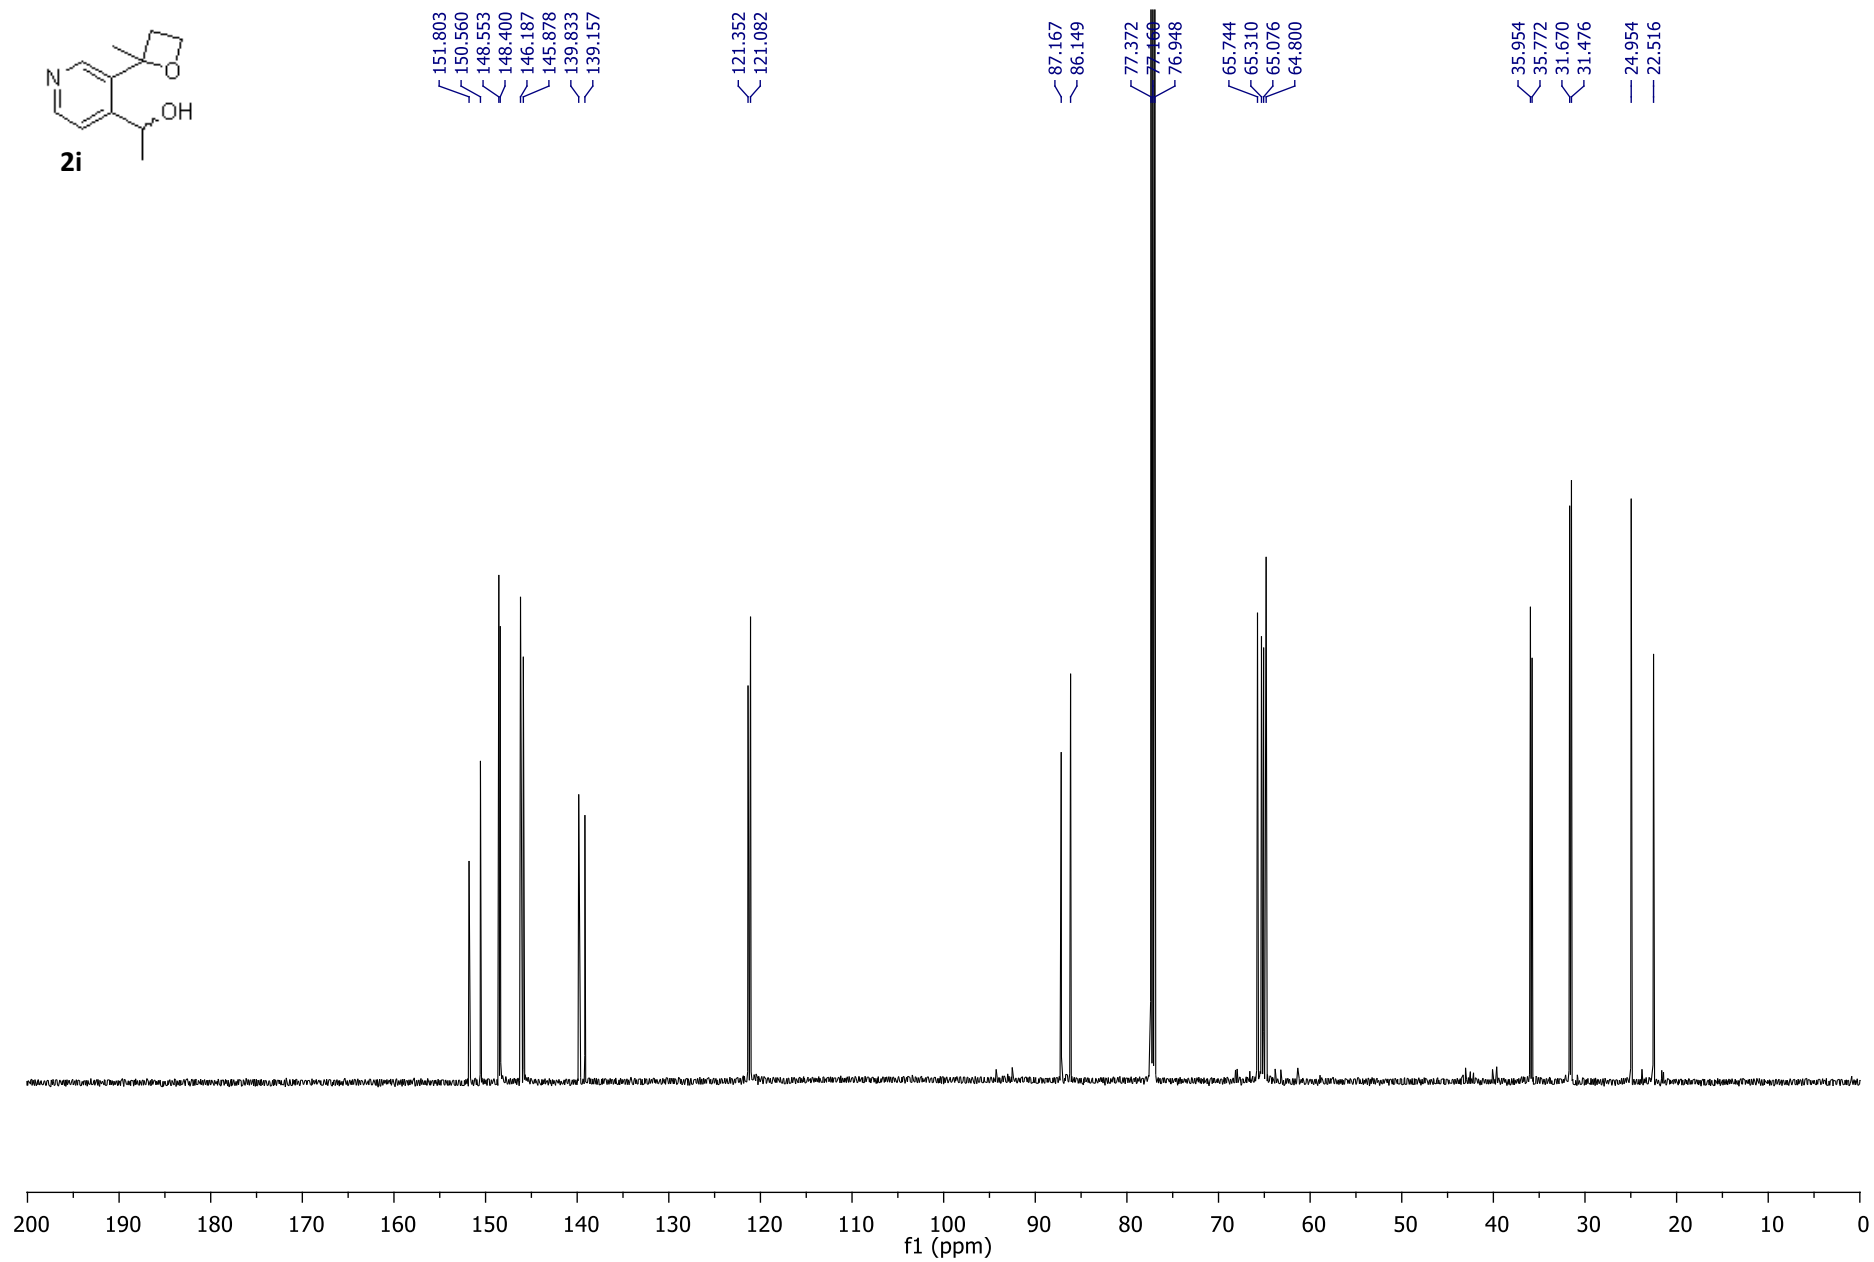

2j

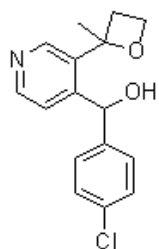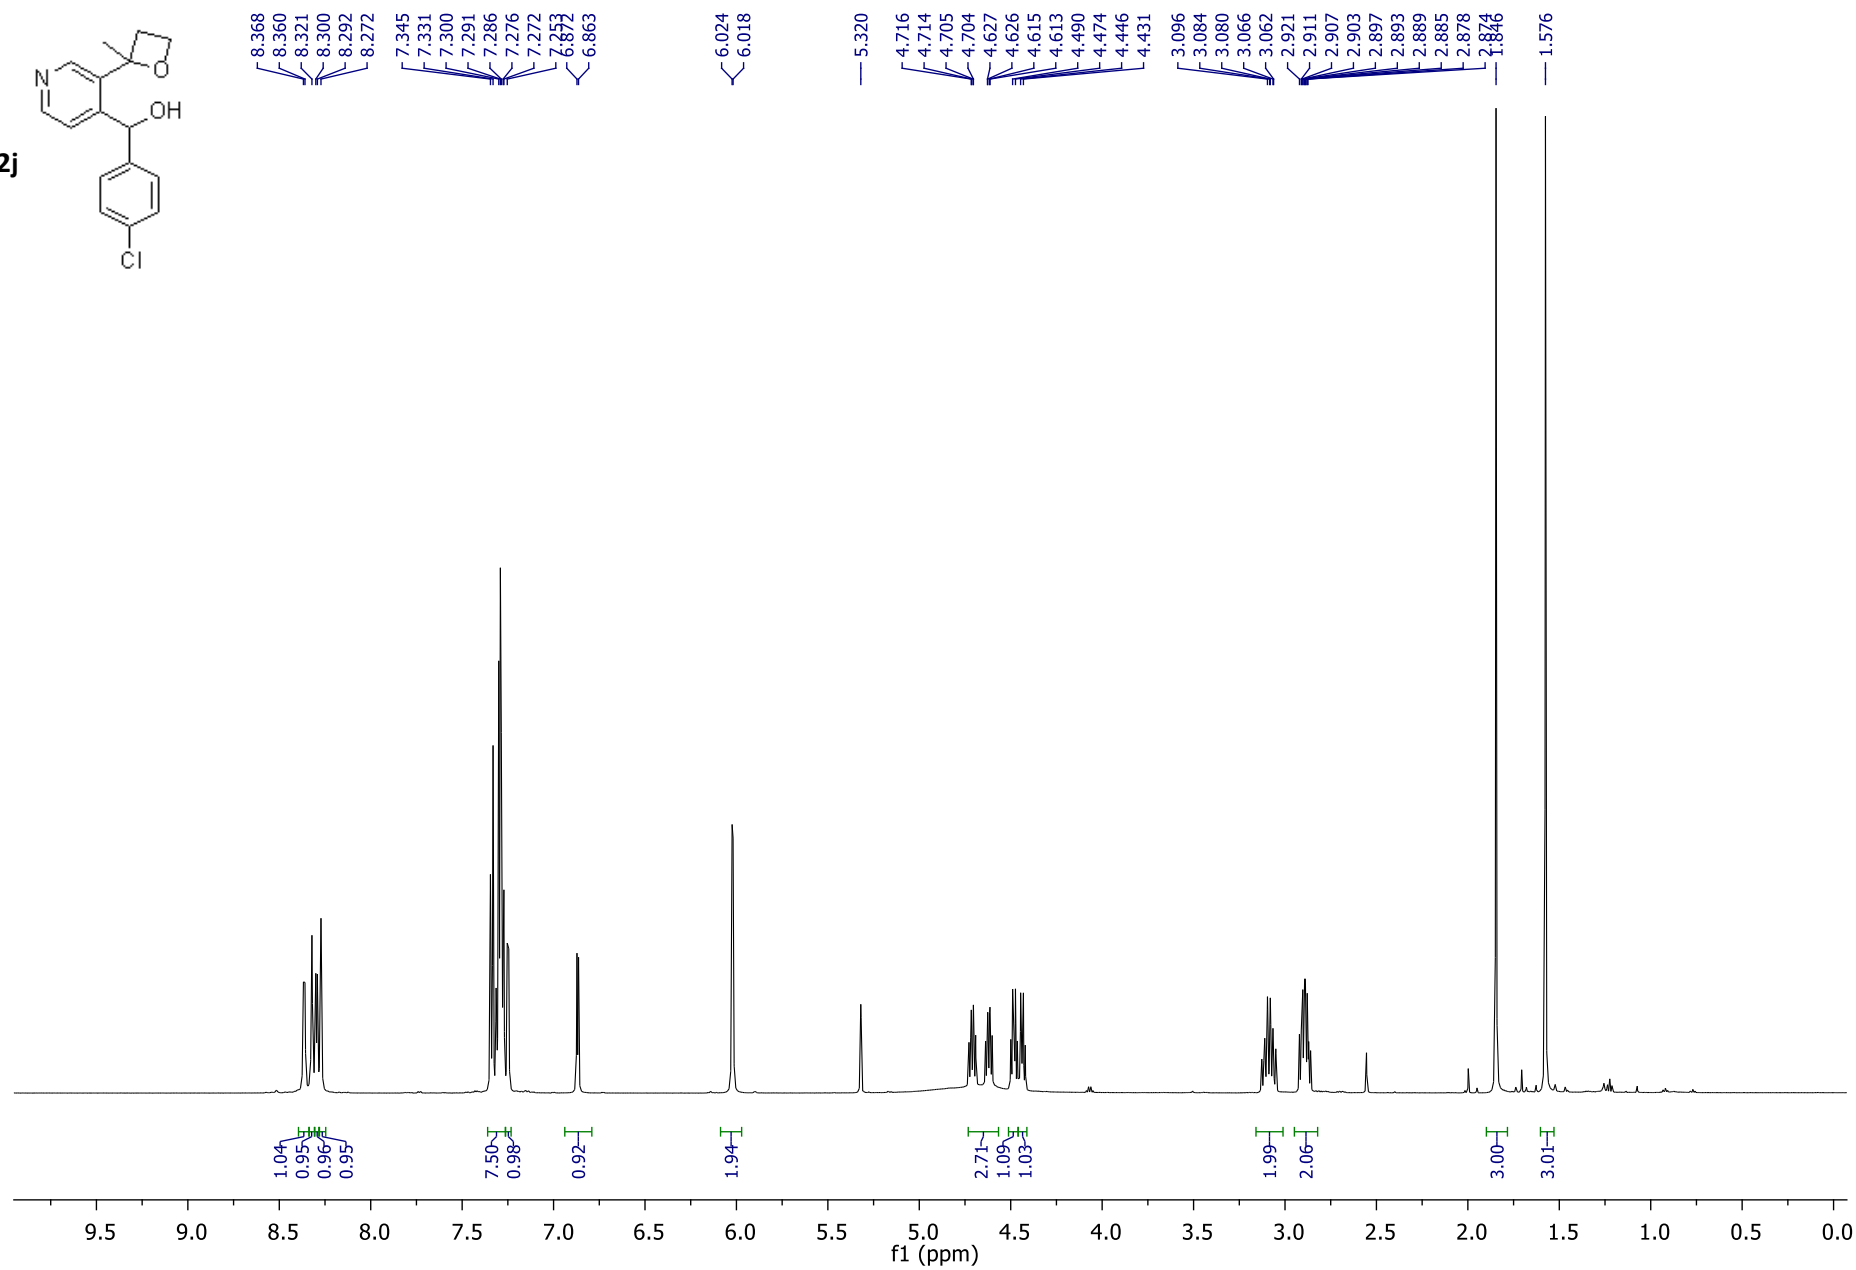



2j

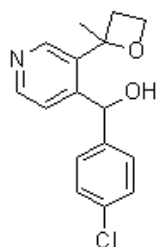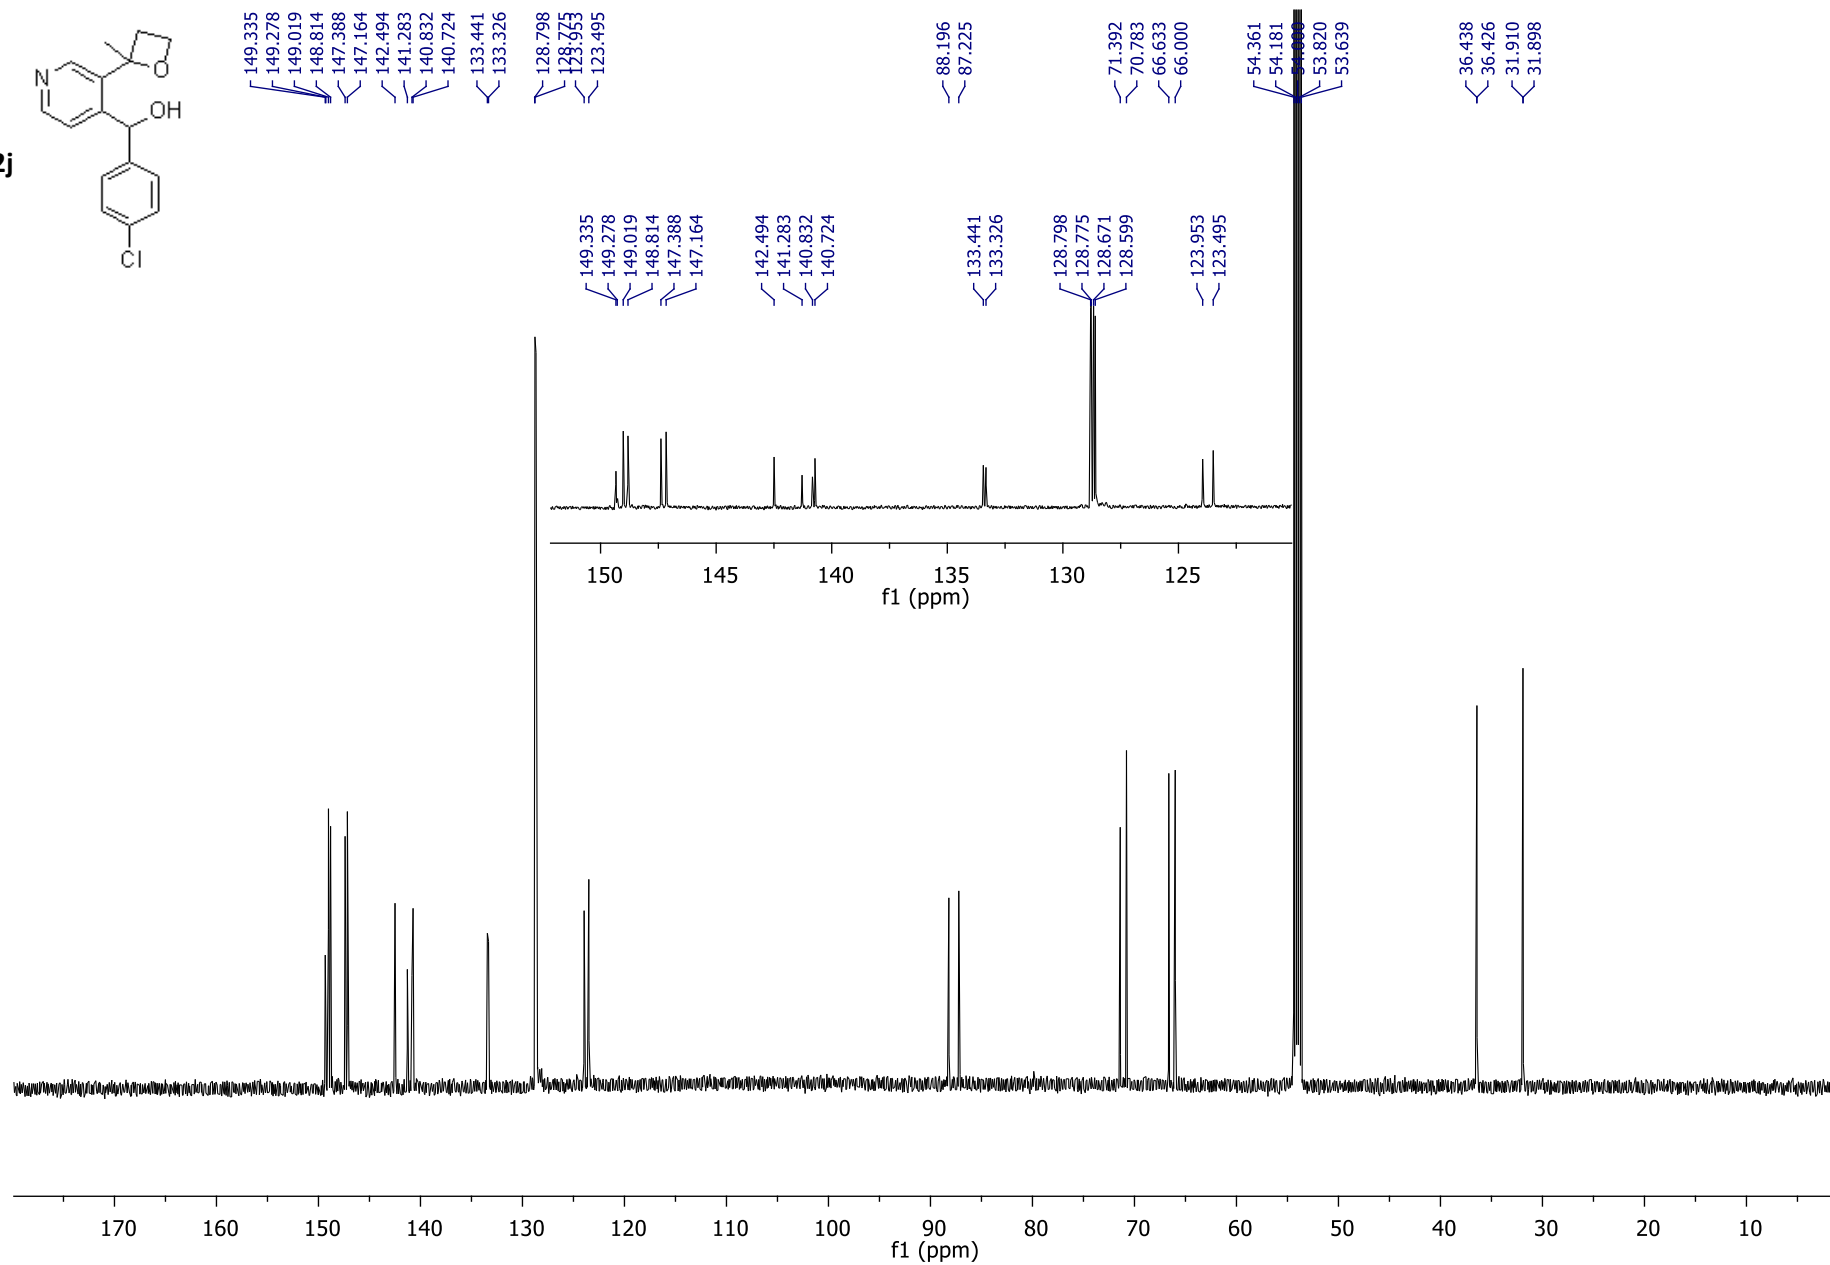

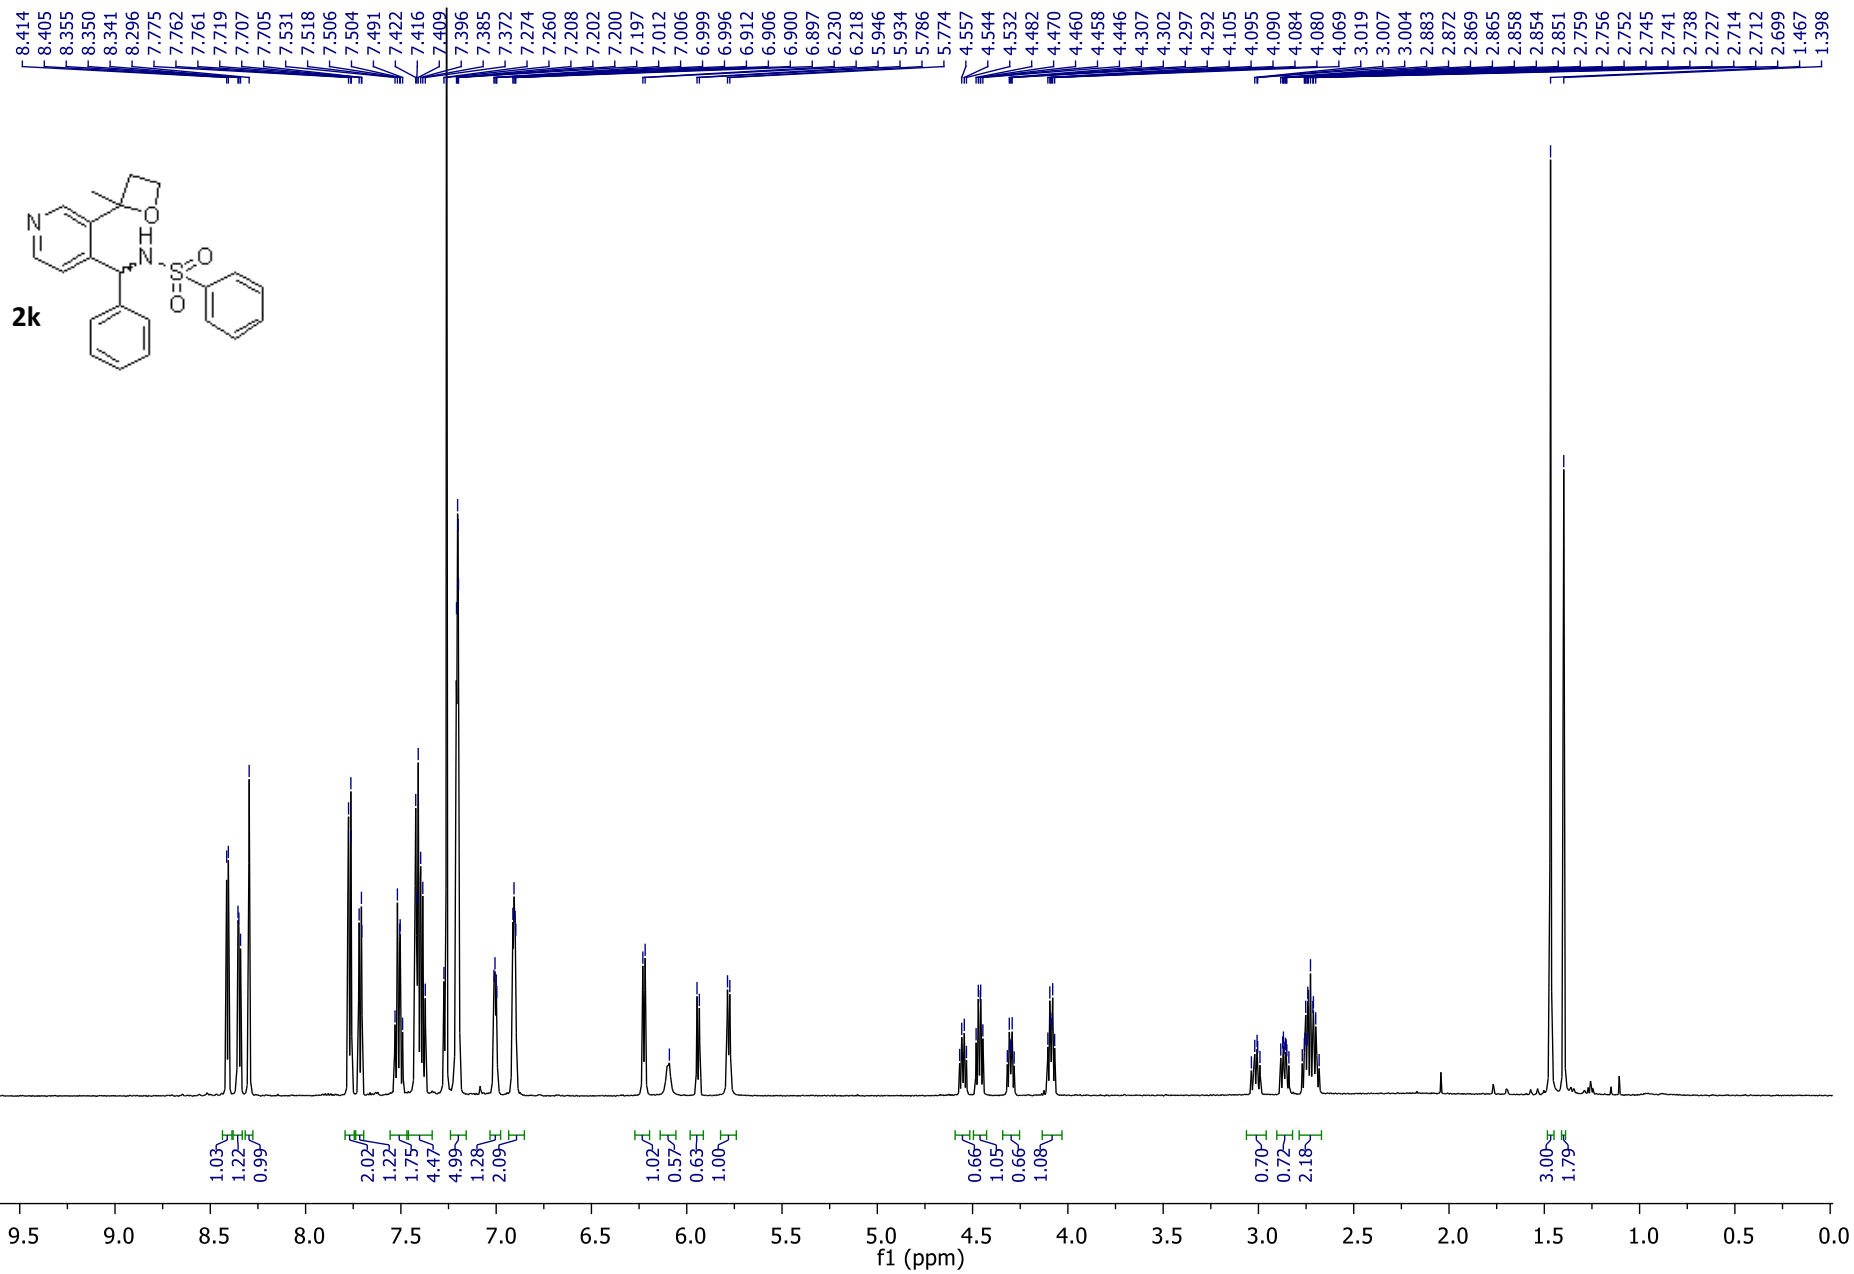

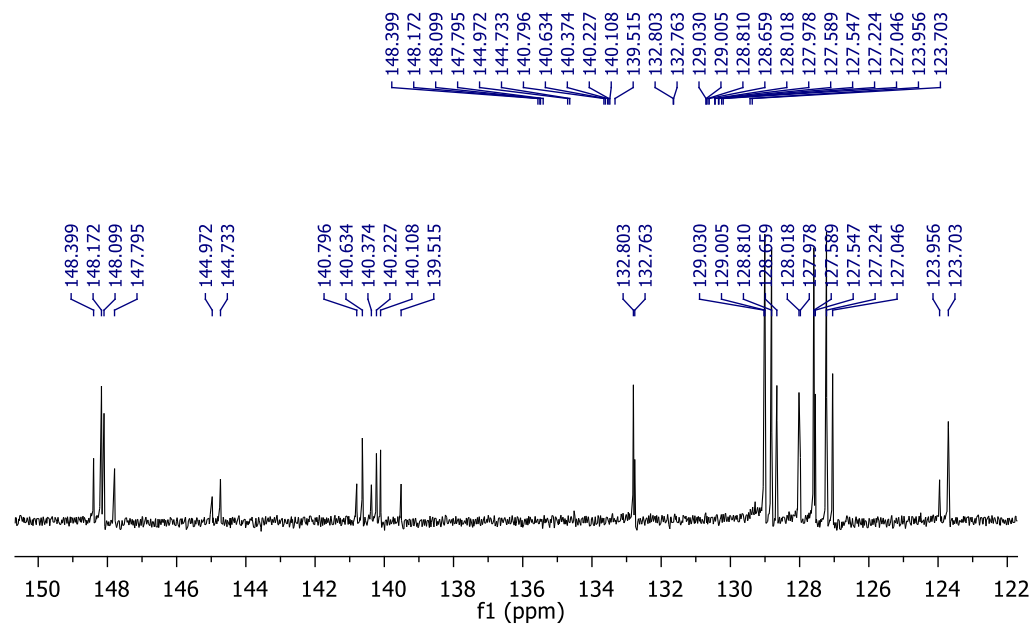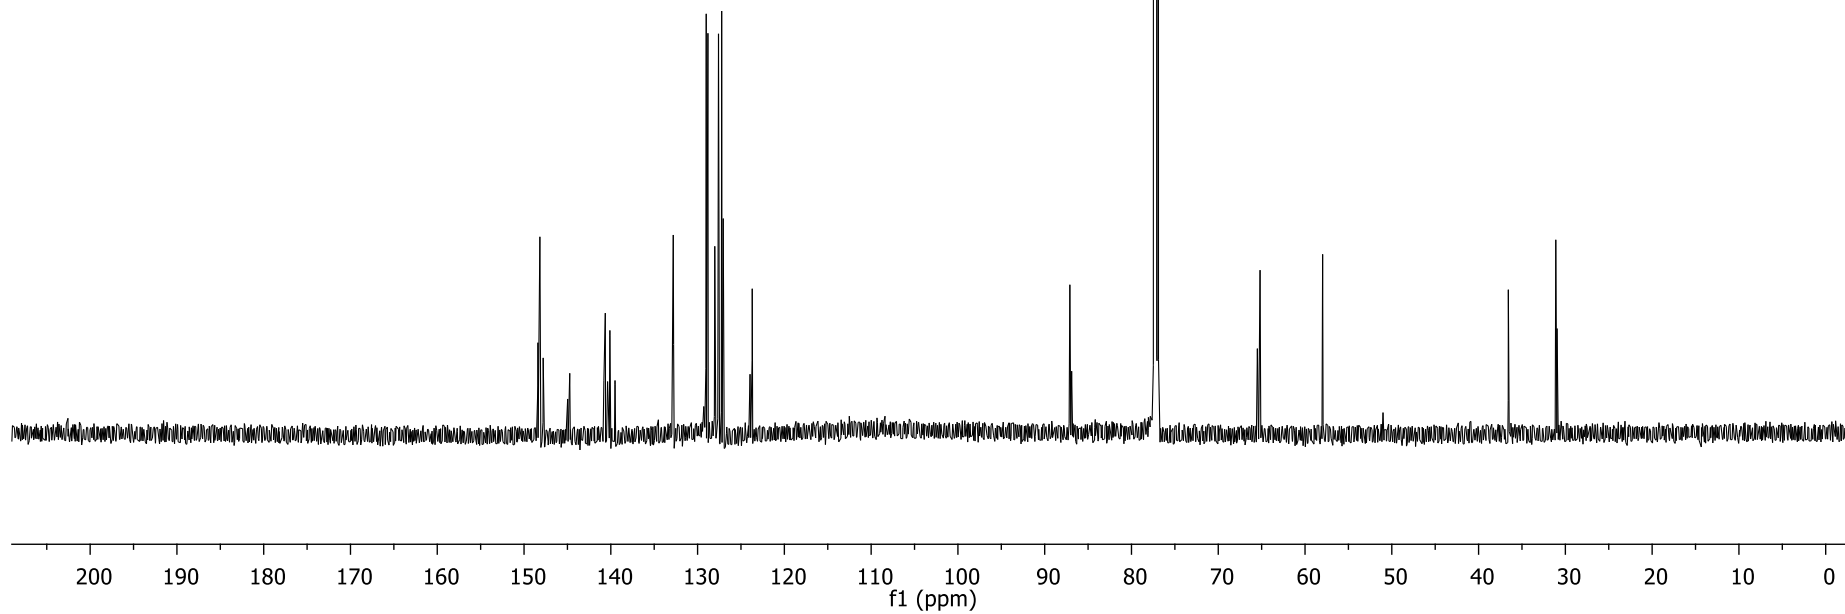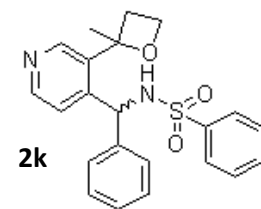

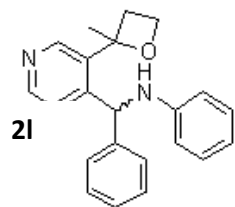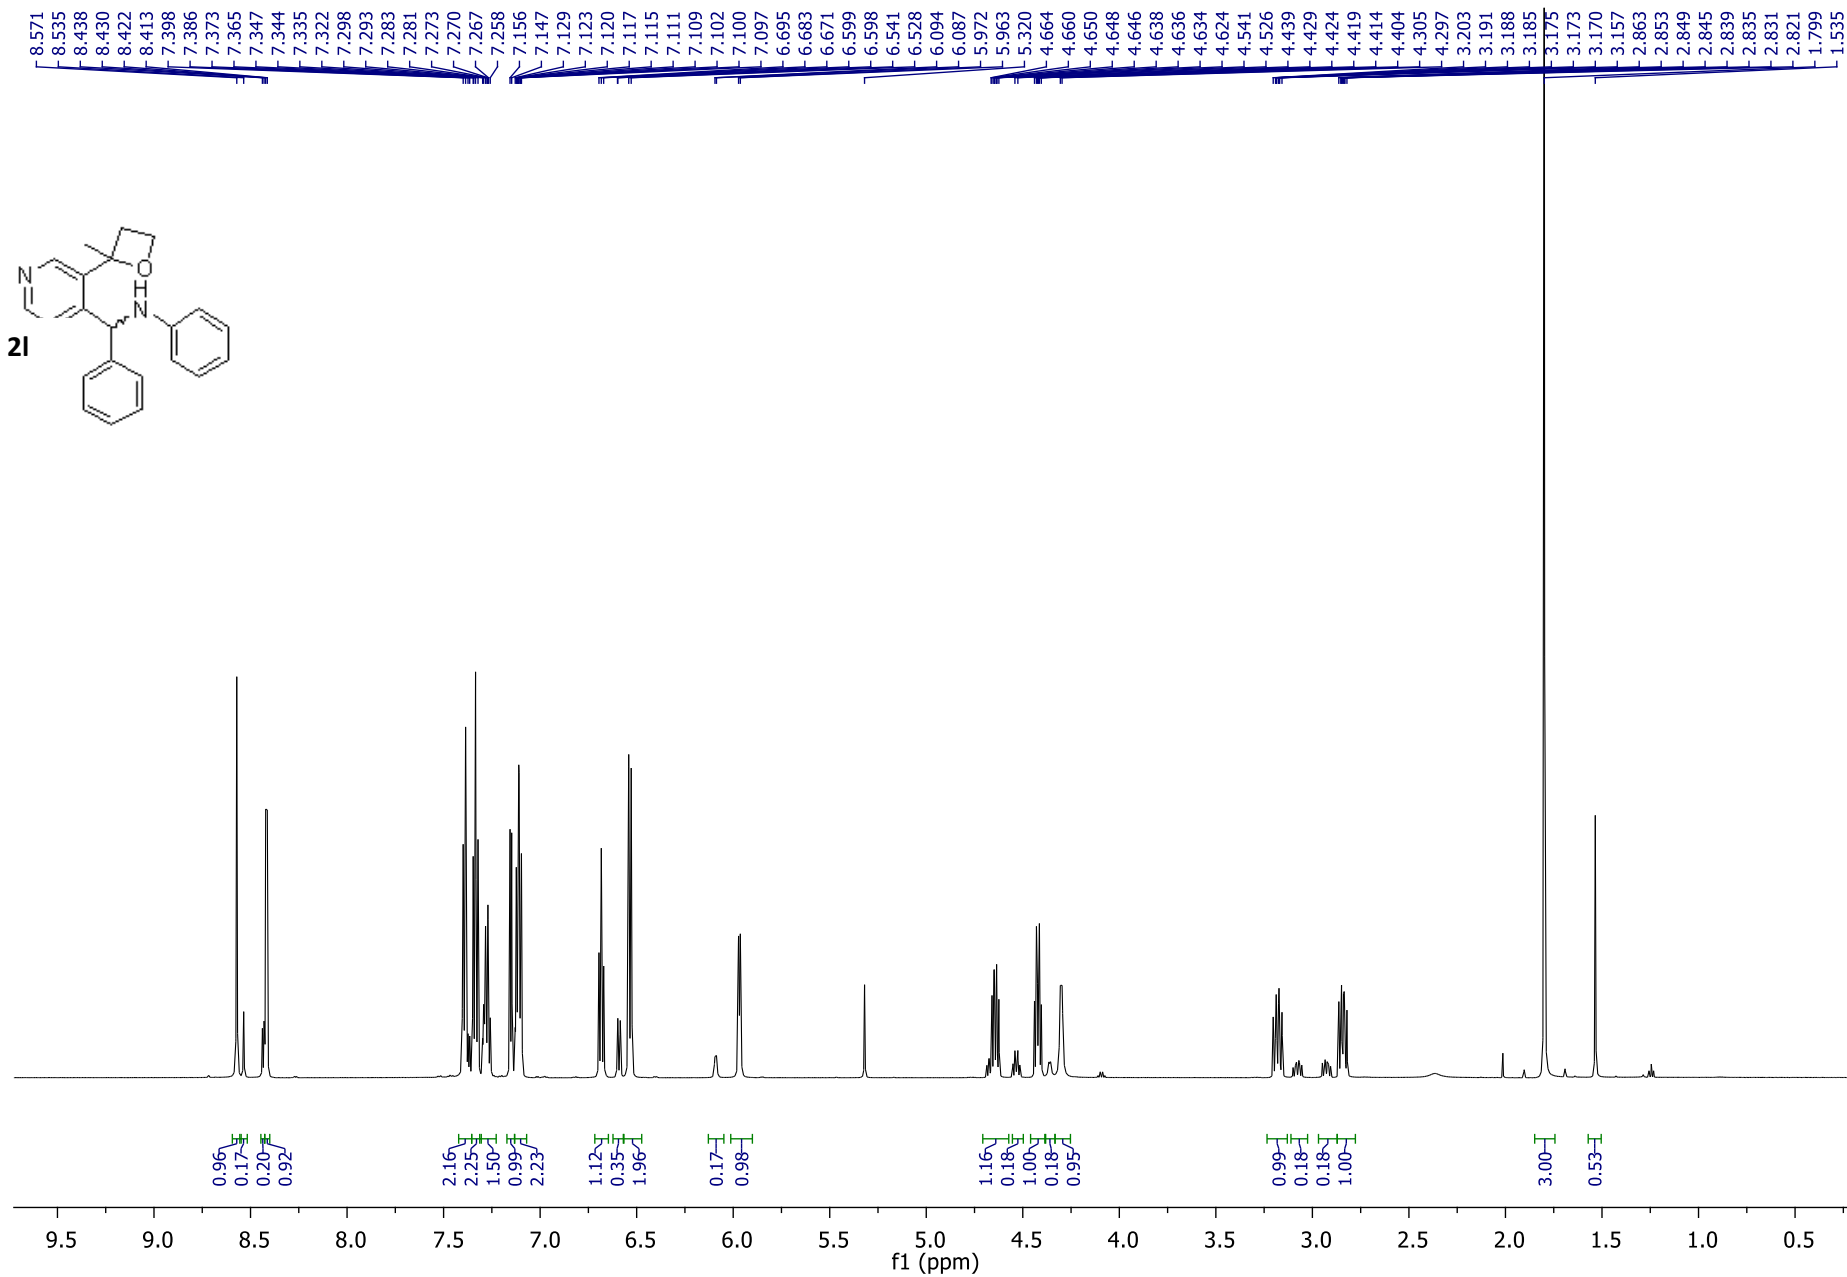

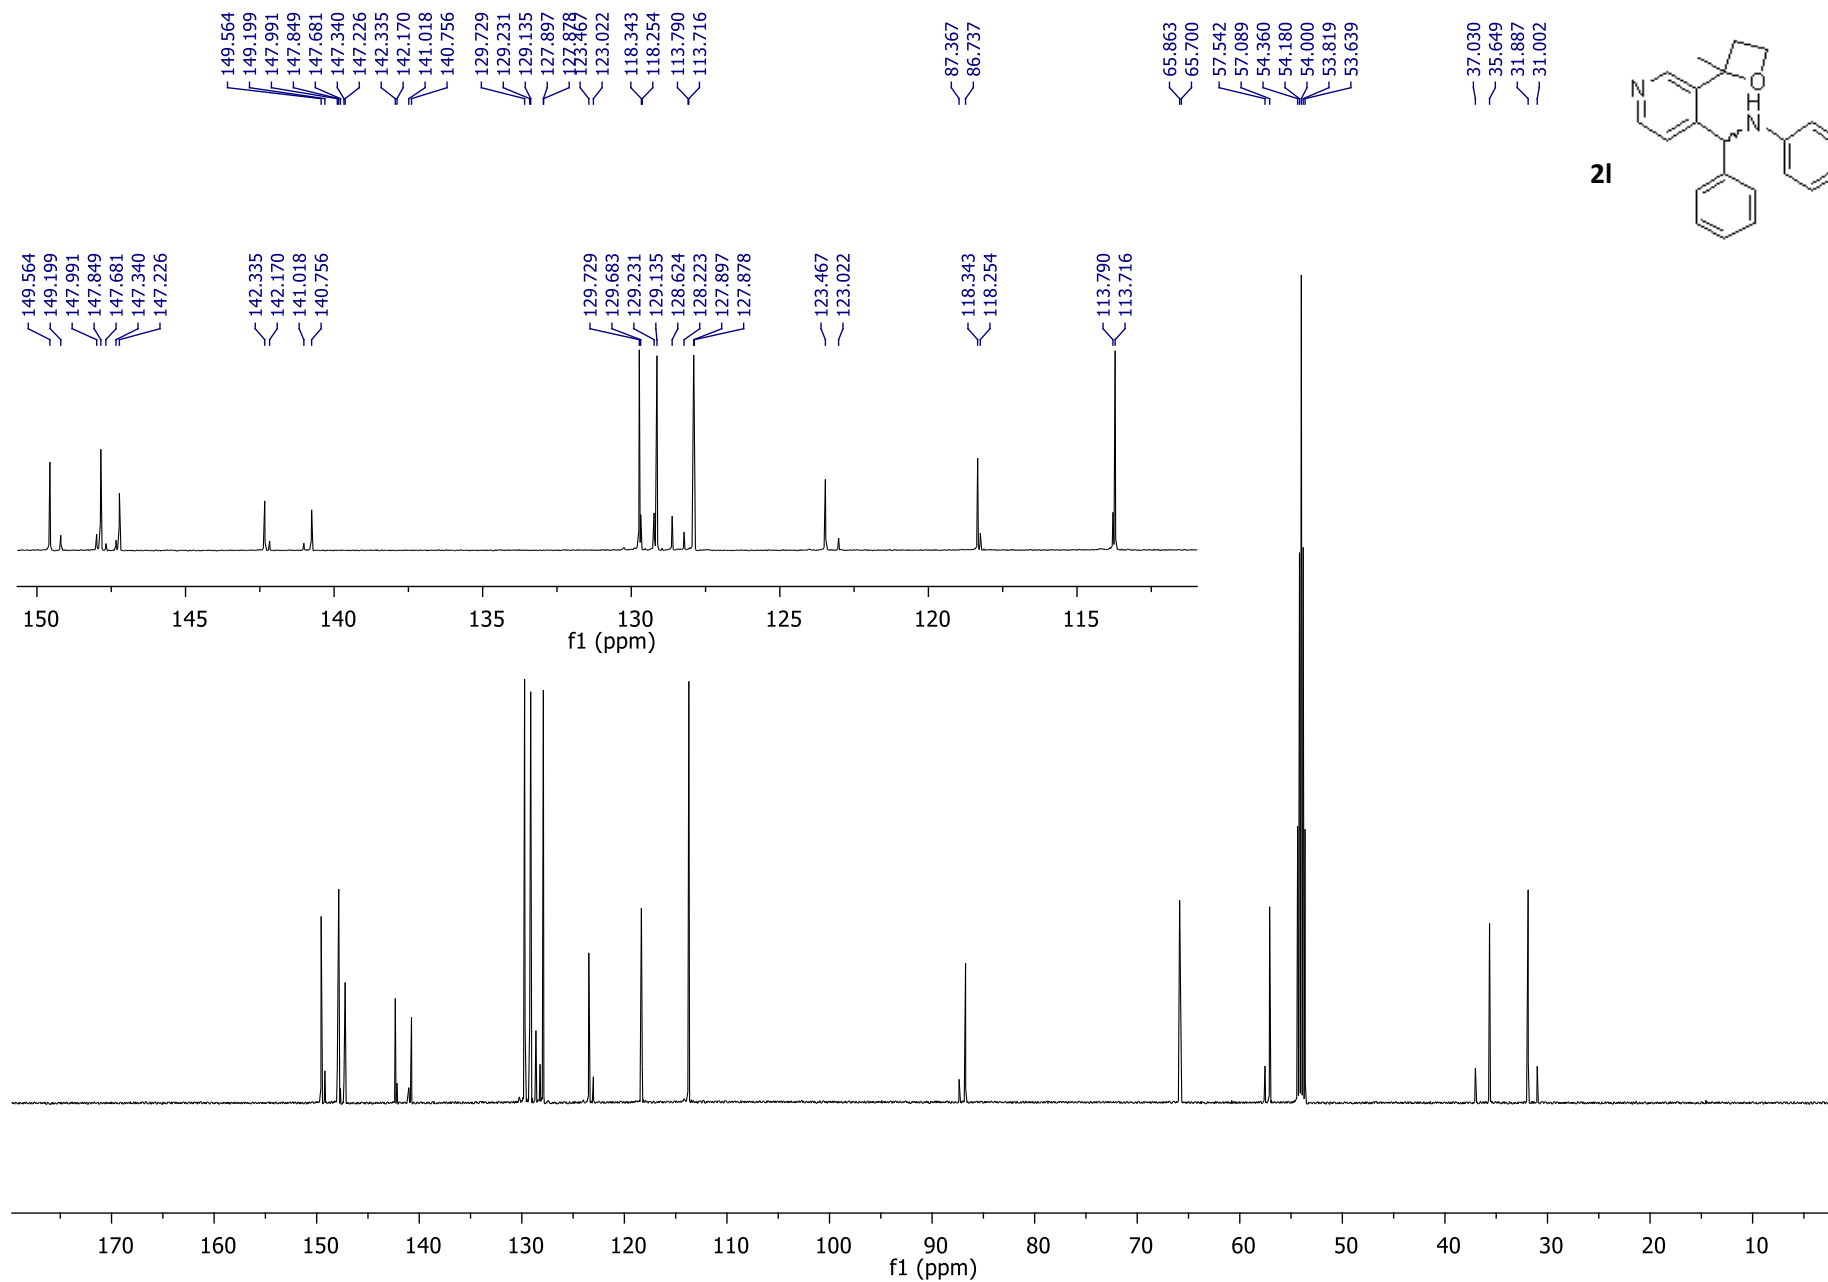

2l

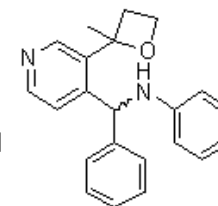

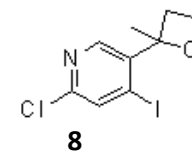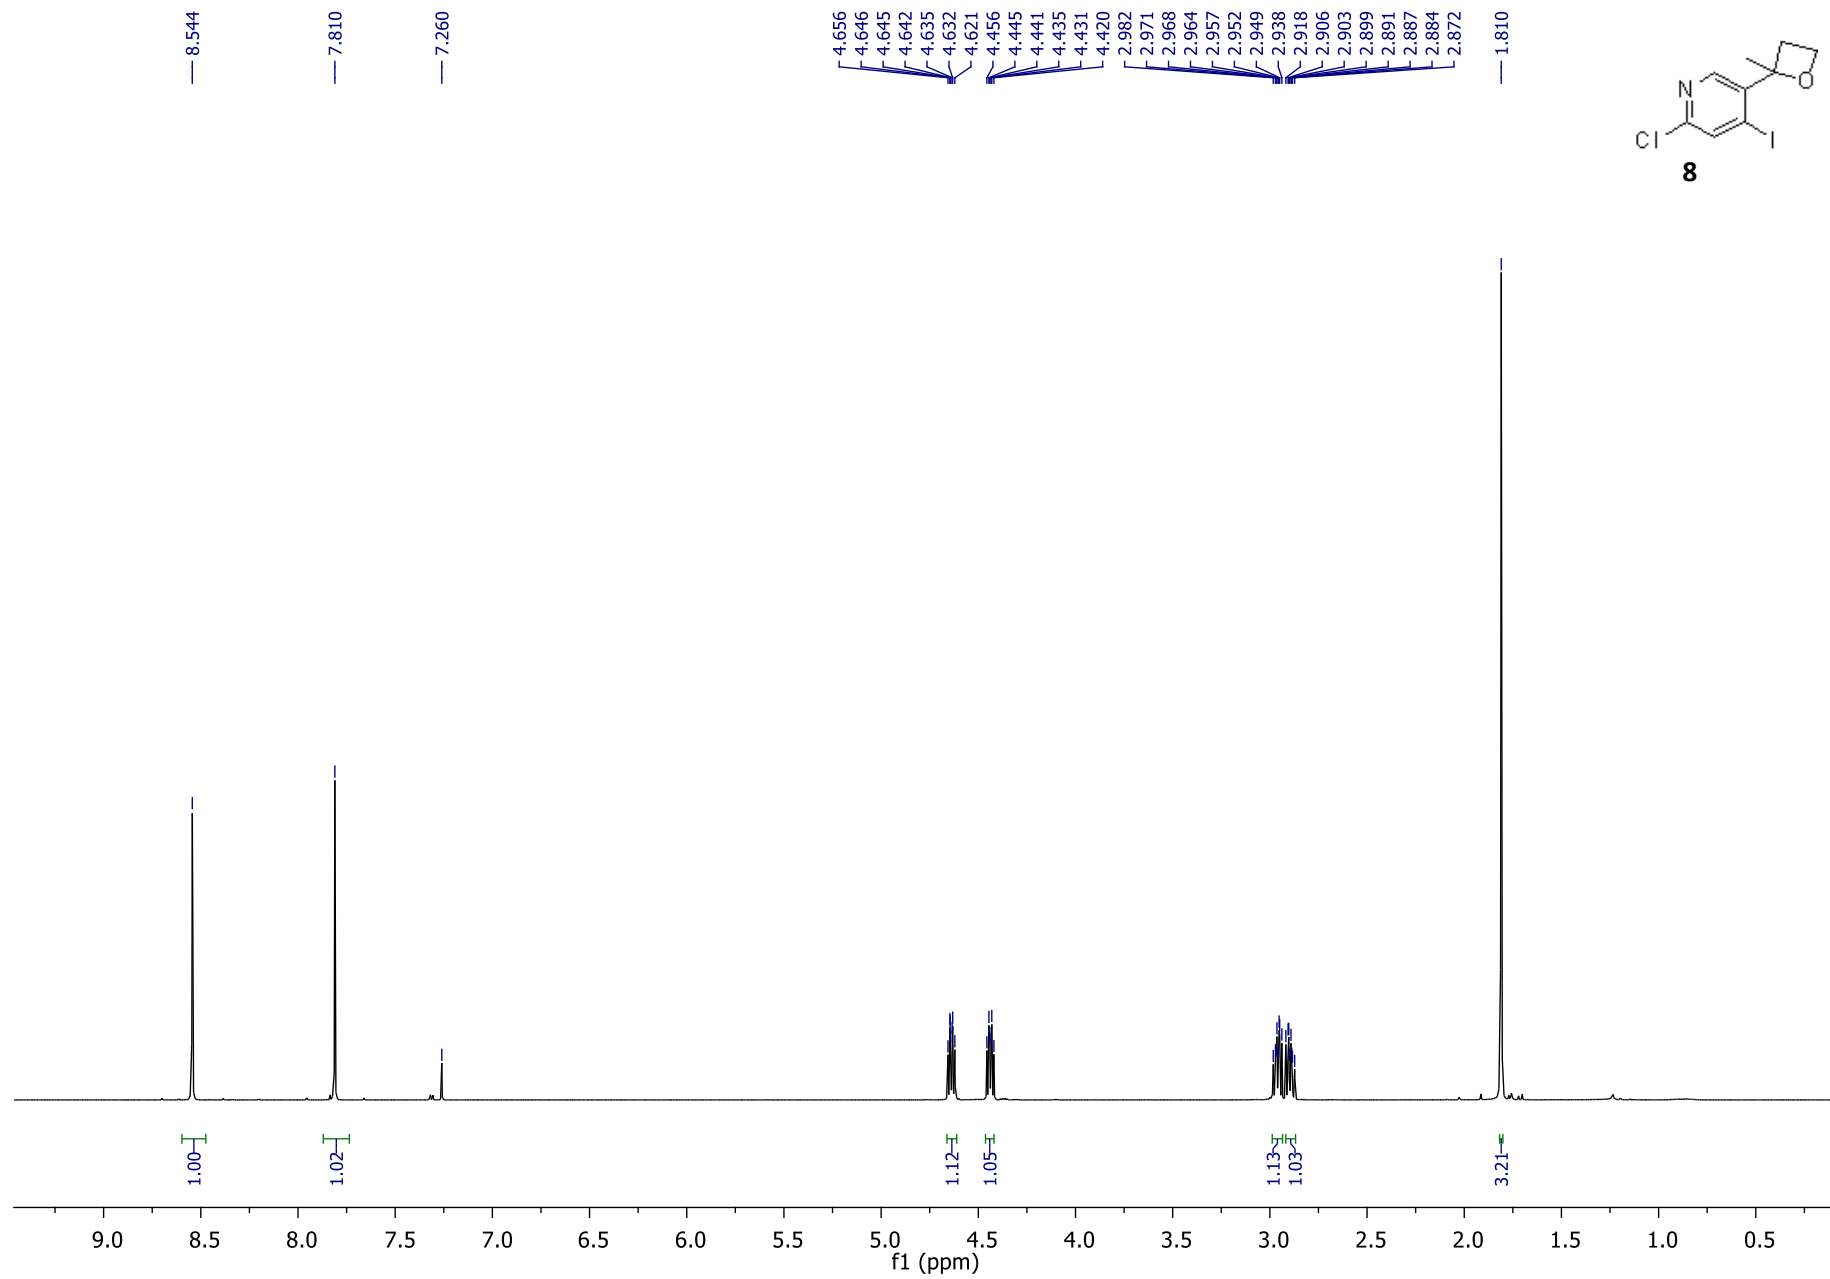

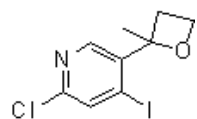

**8**

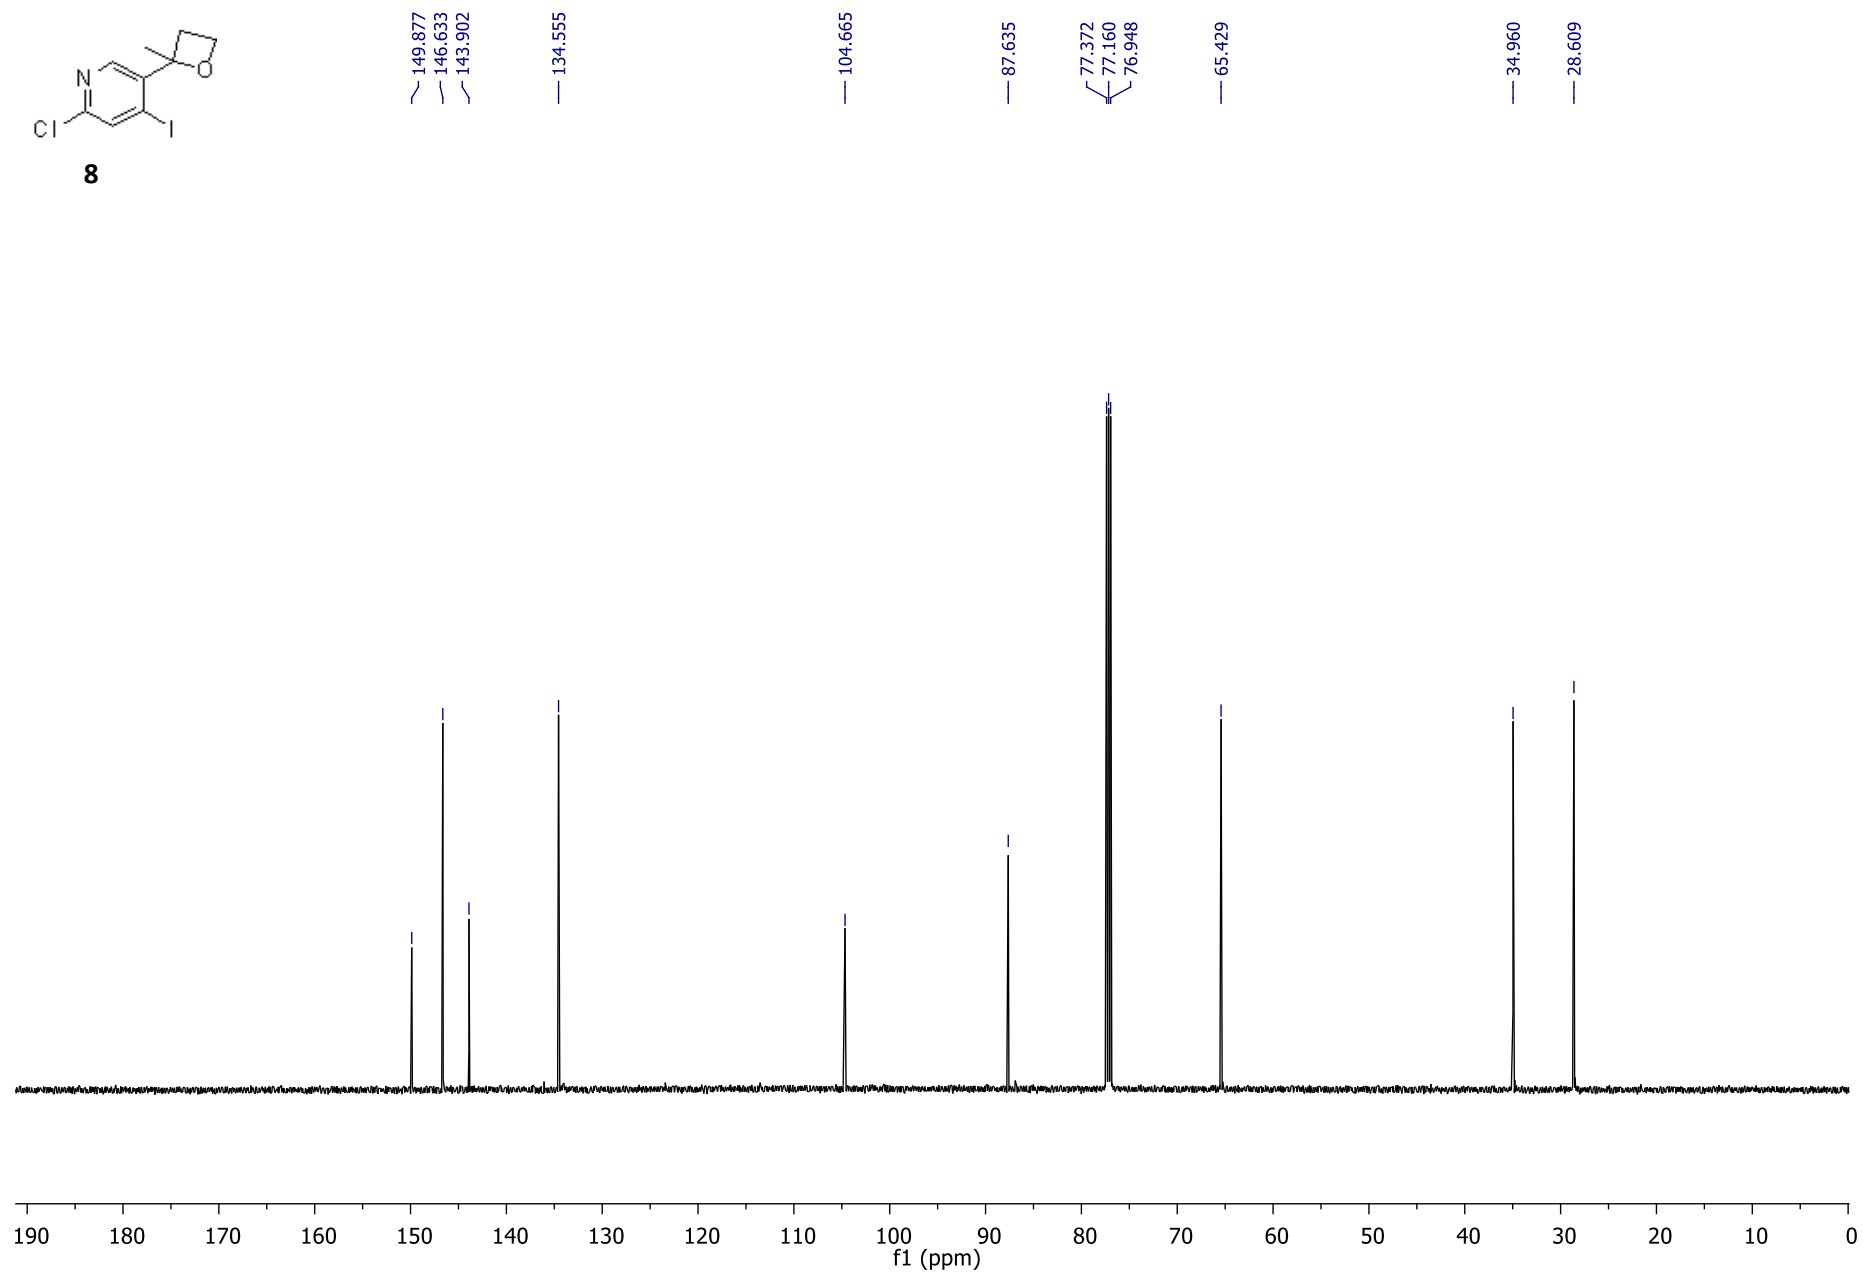

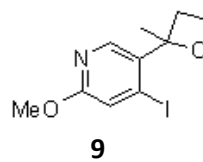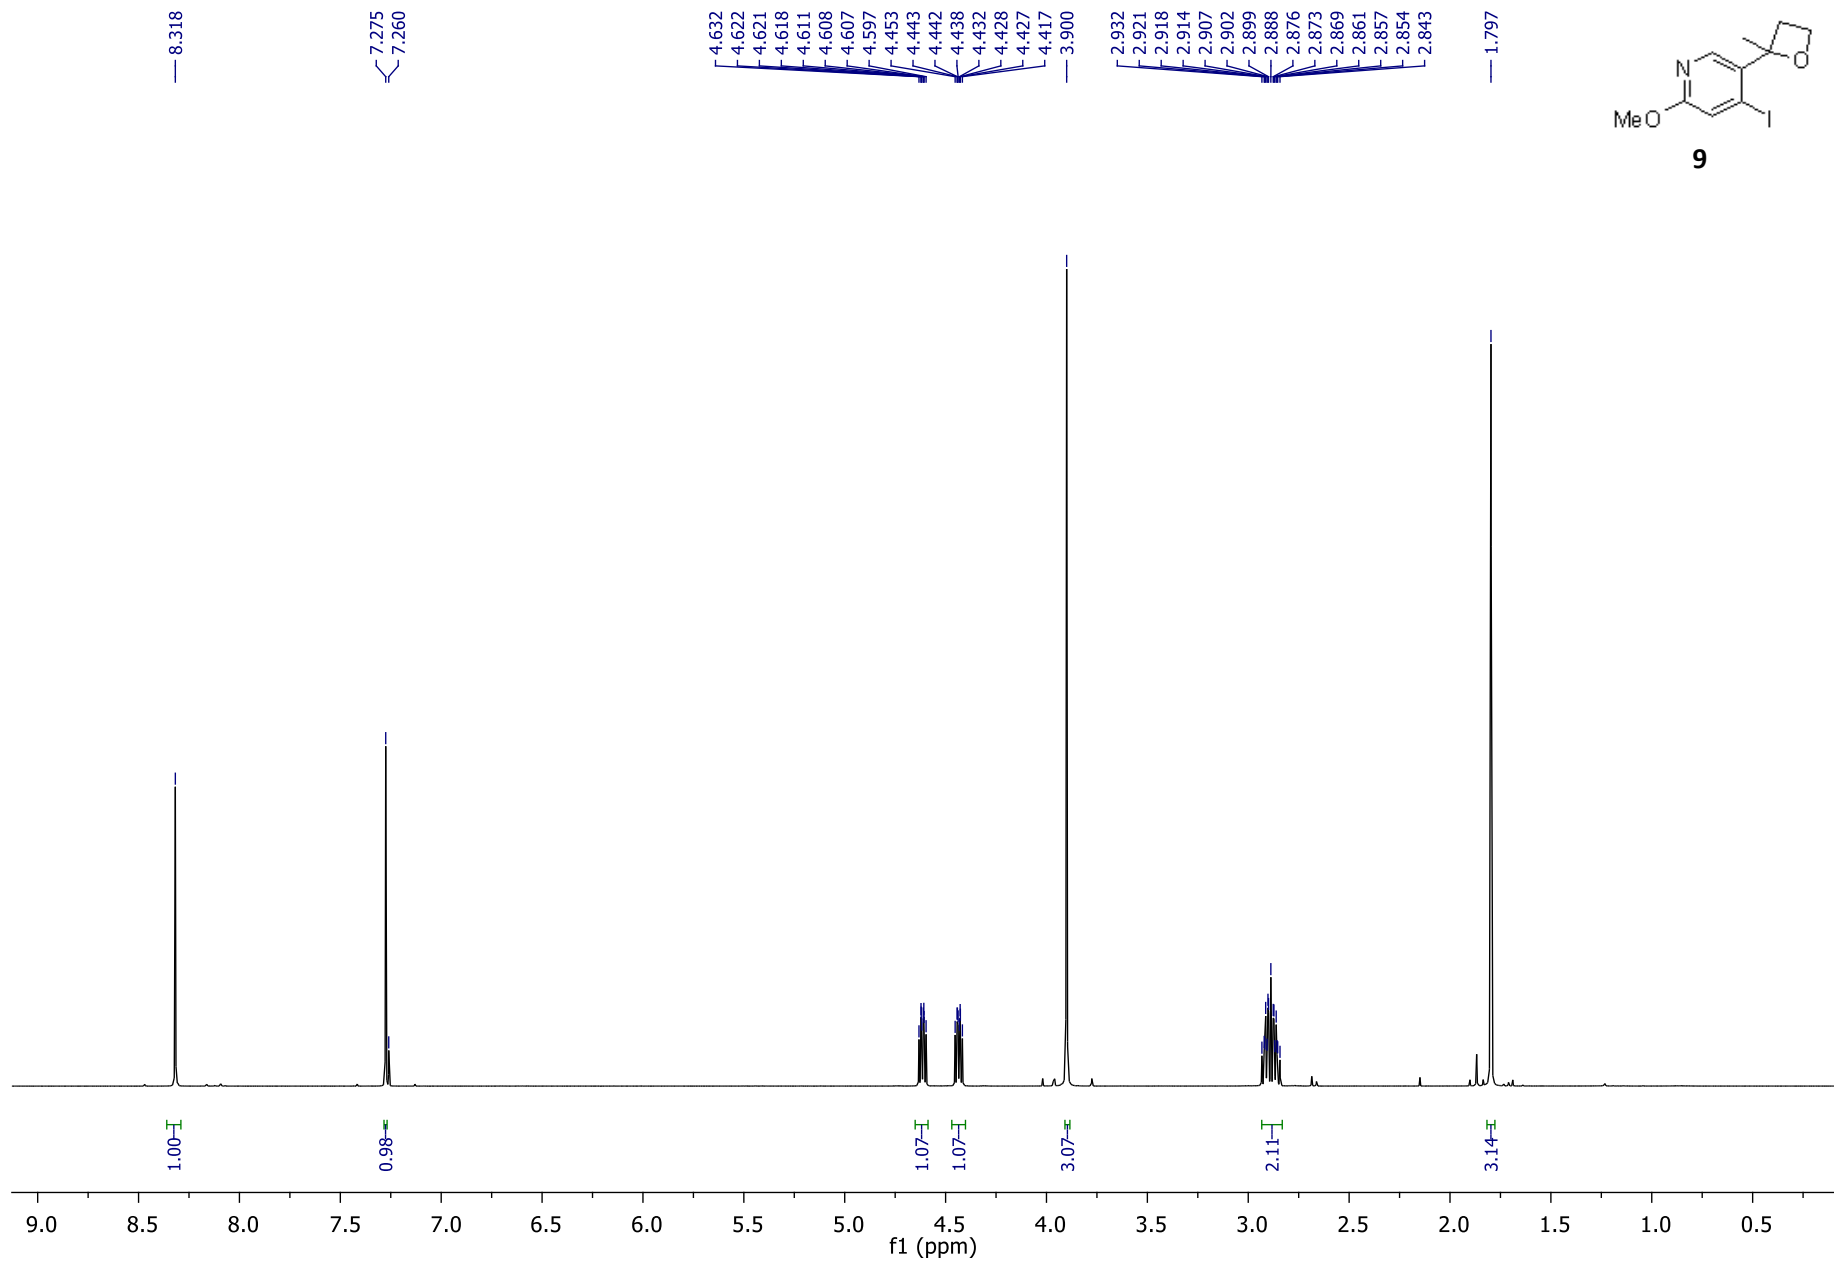



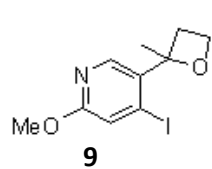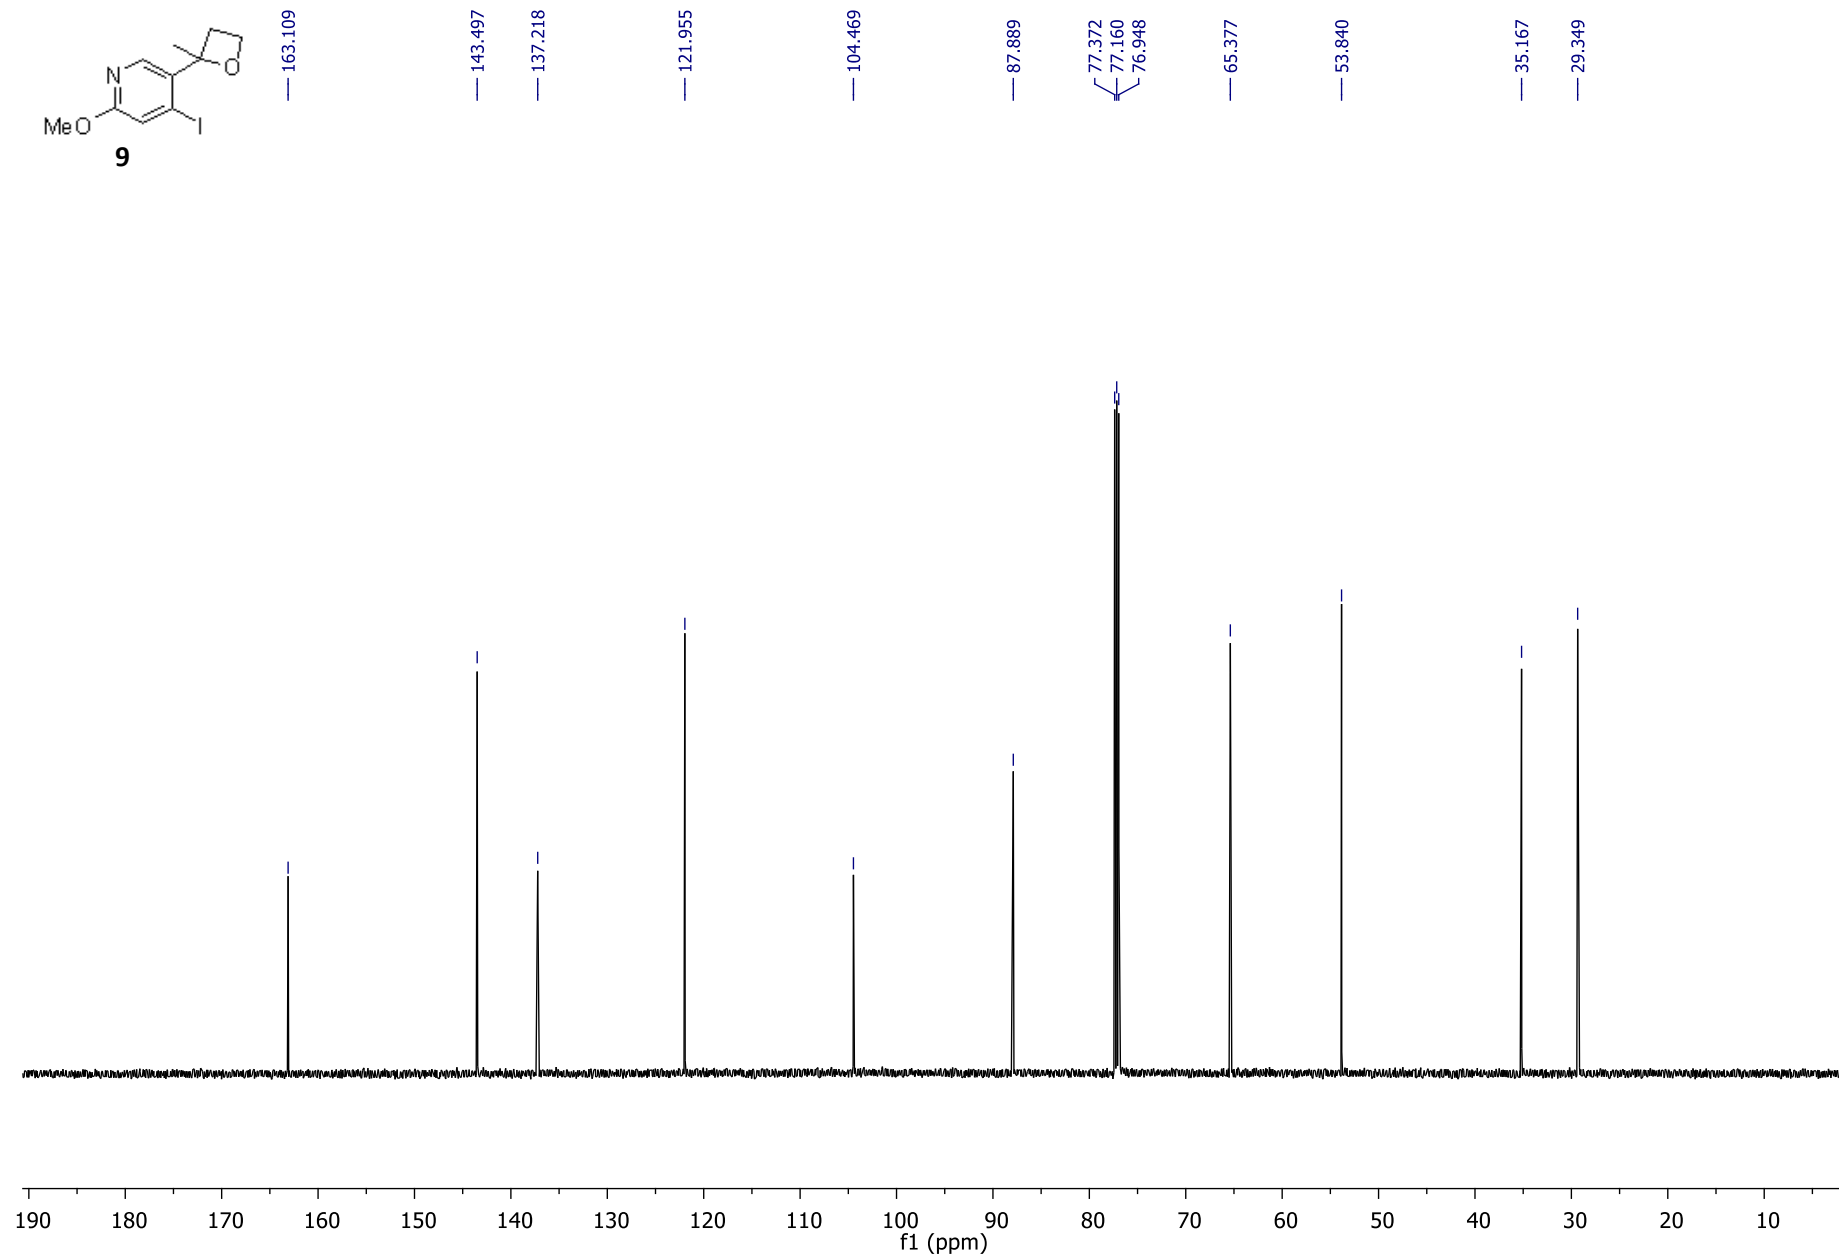

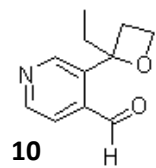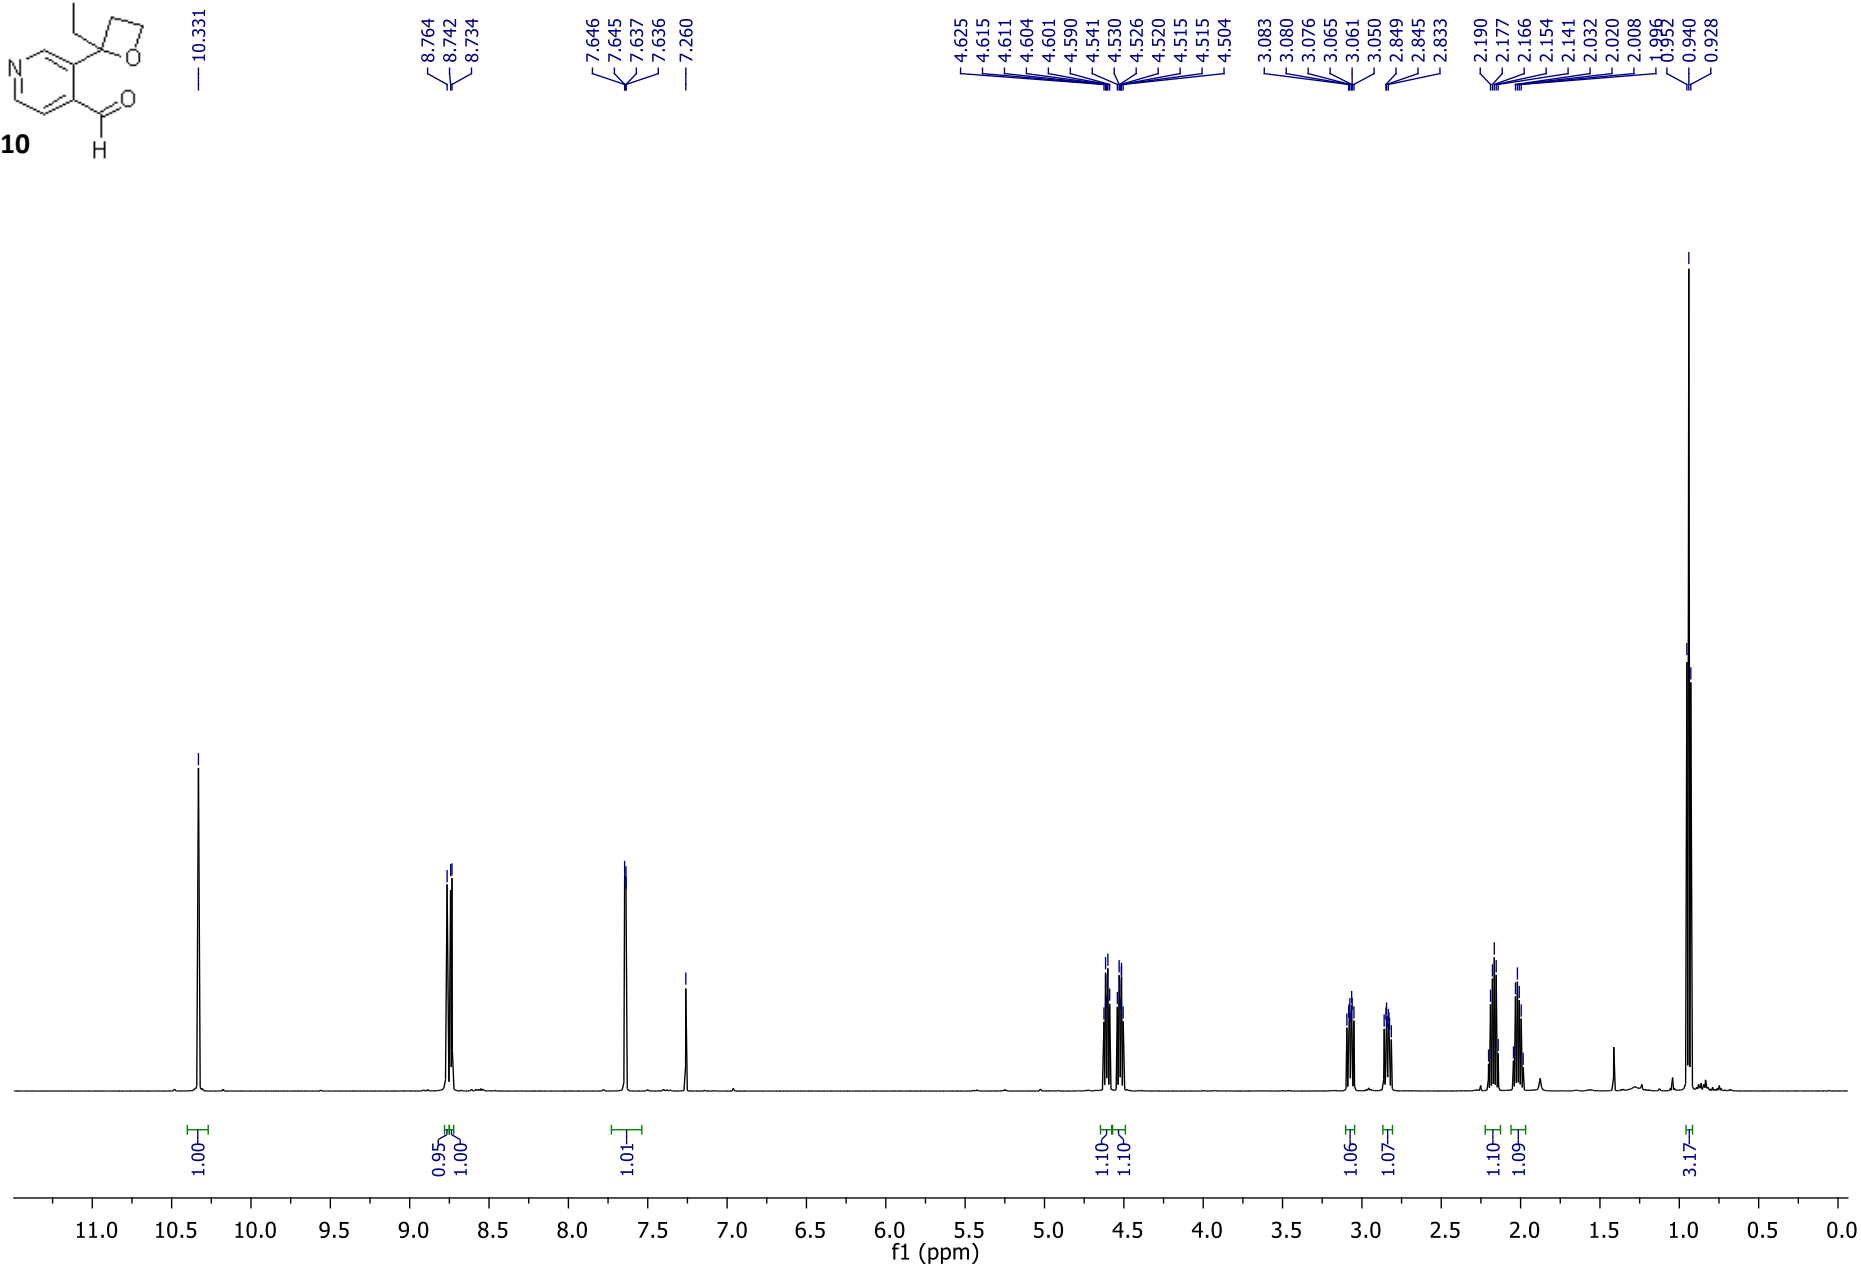

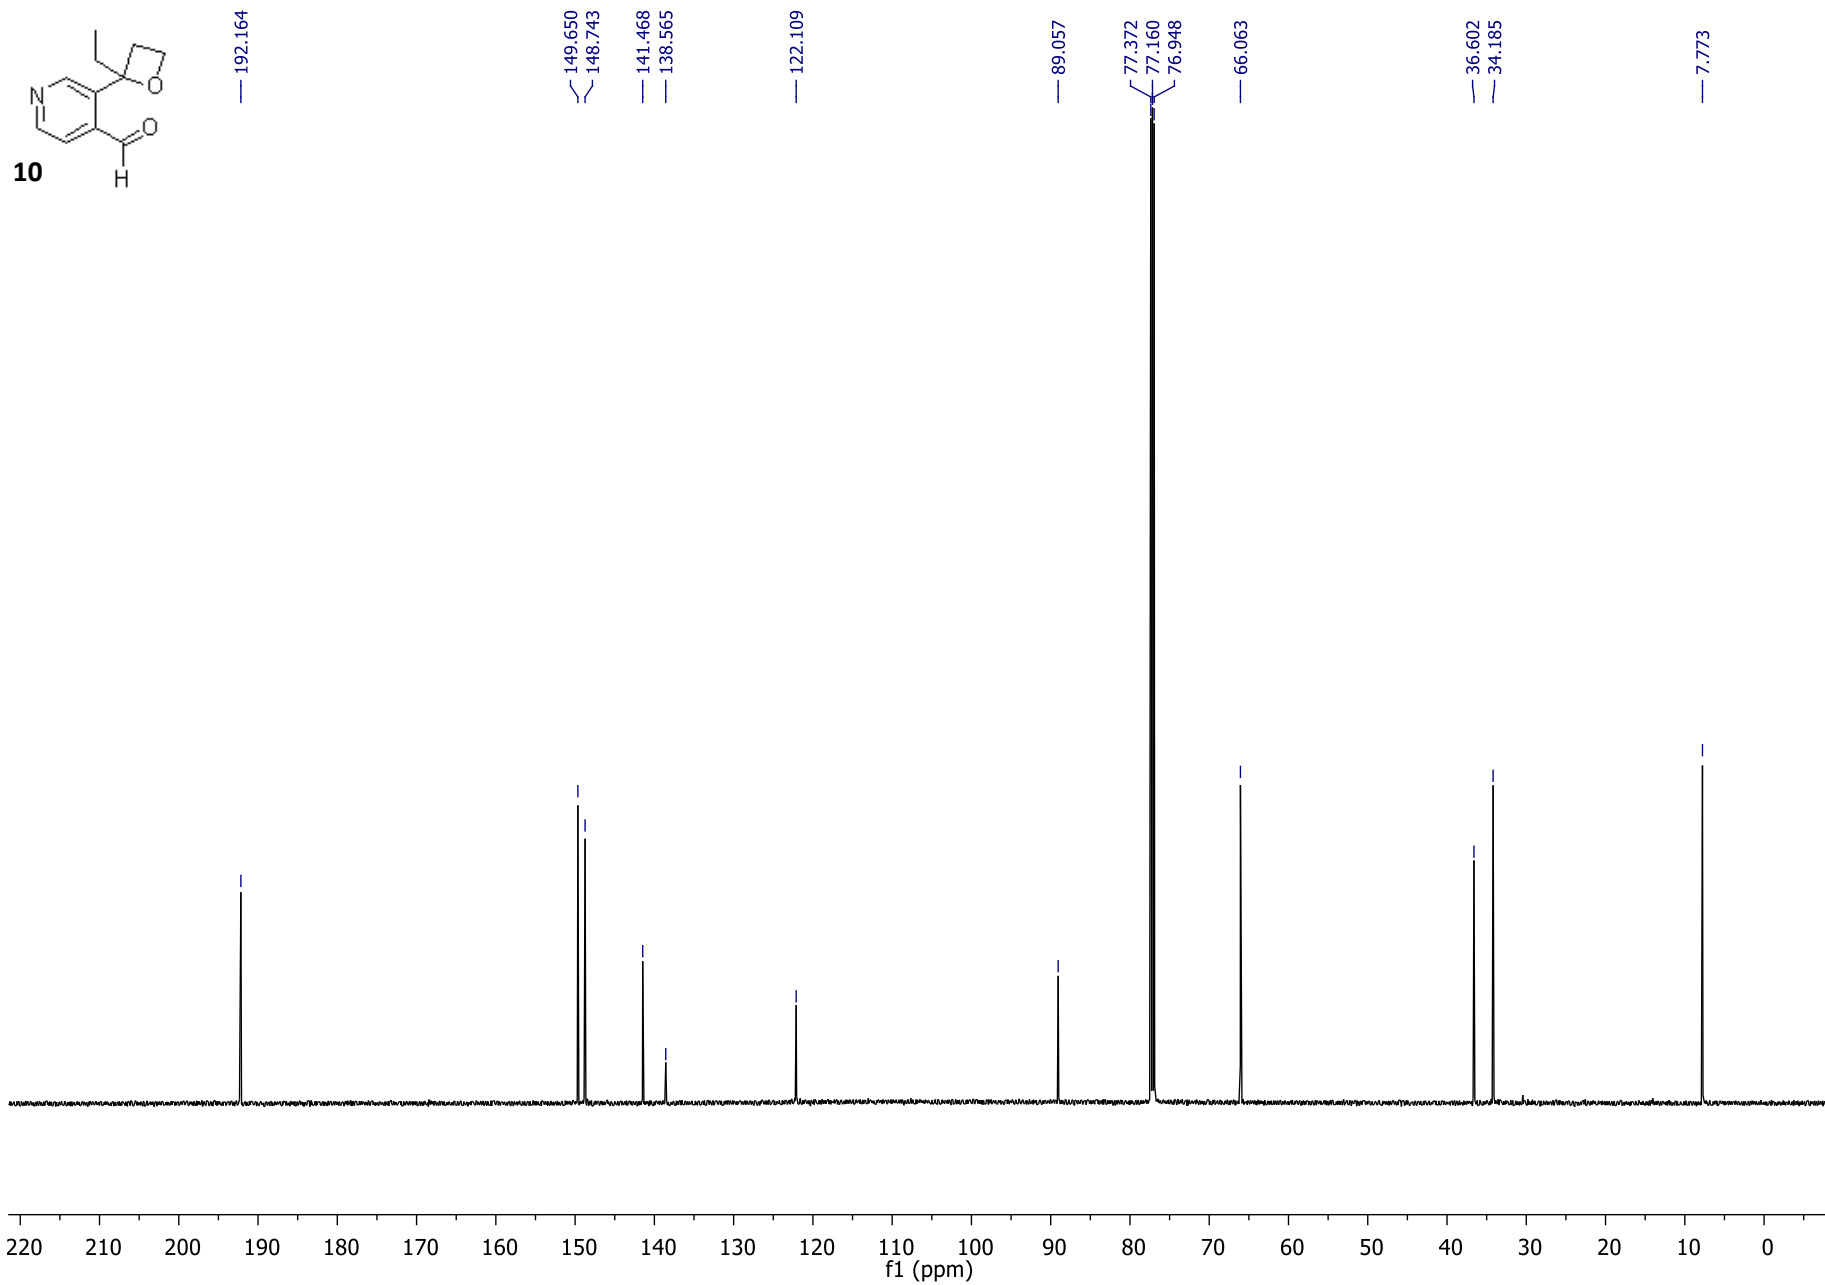

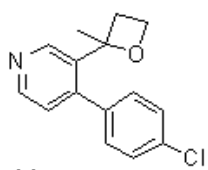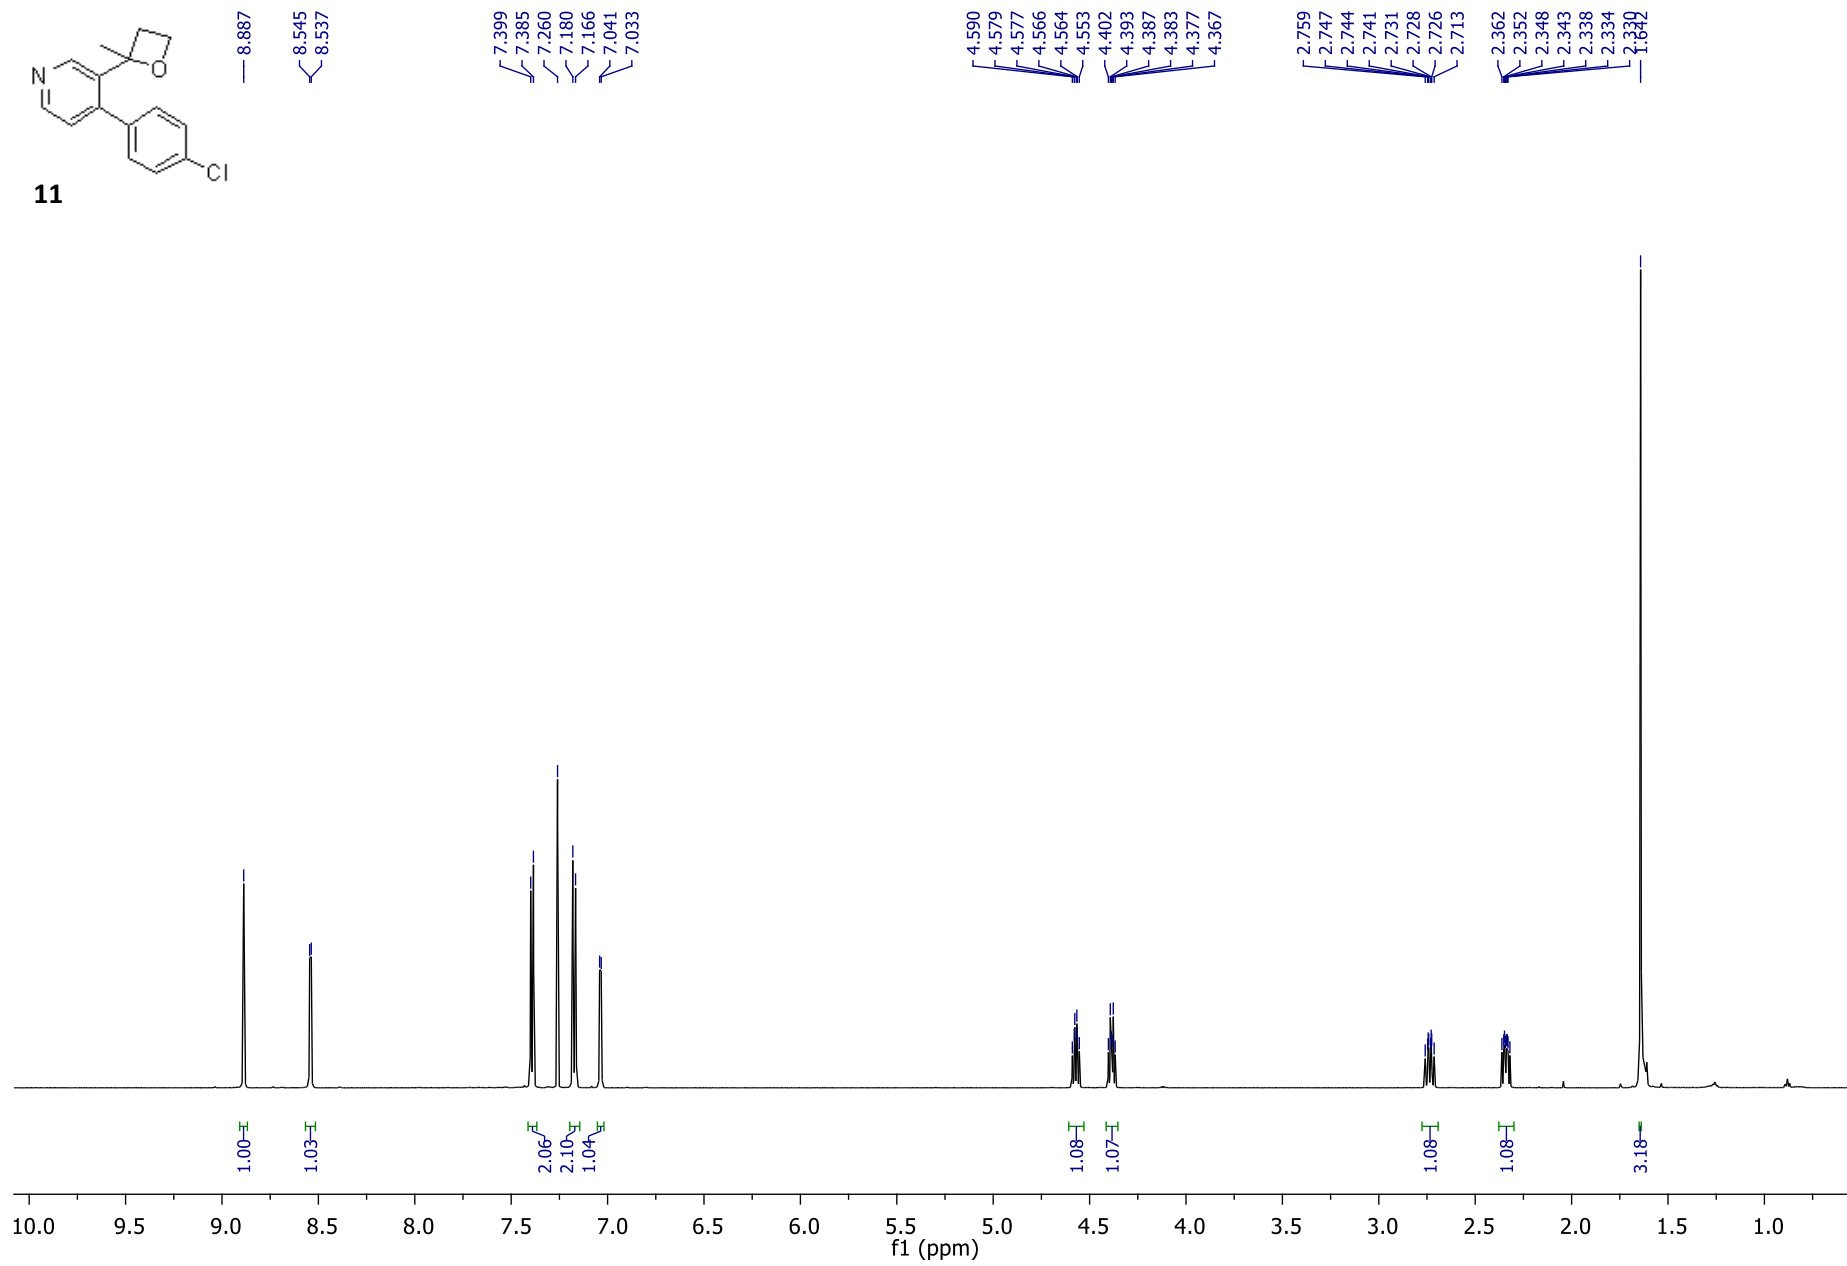

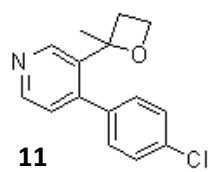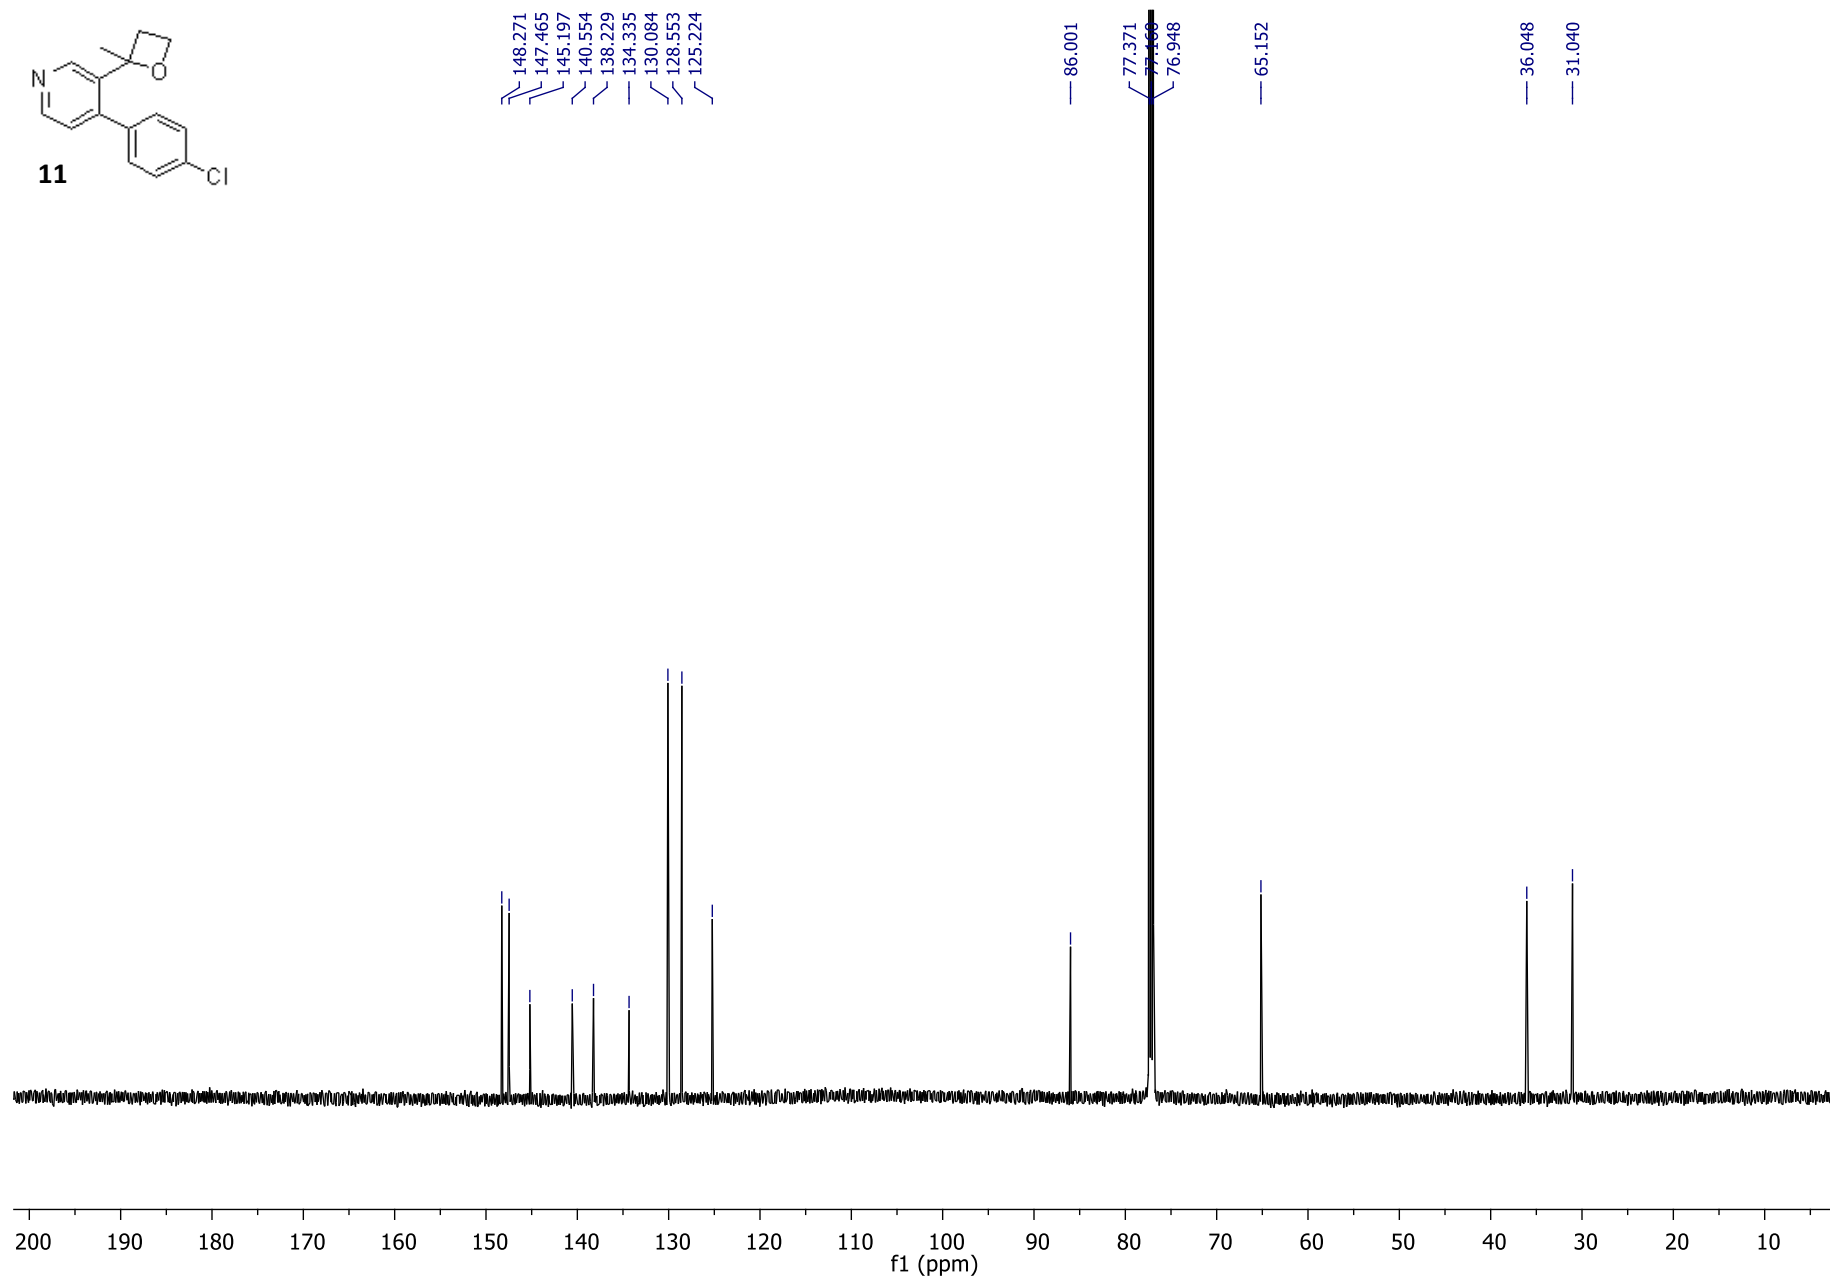

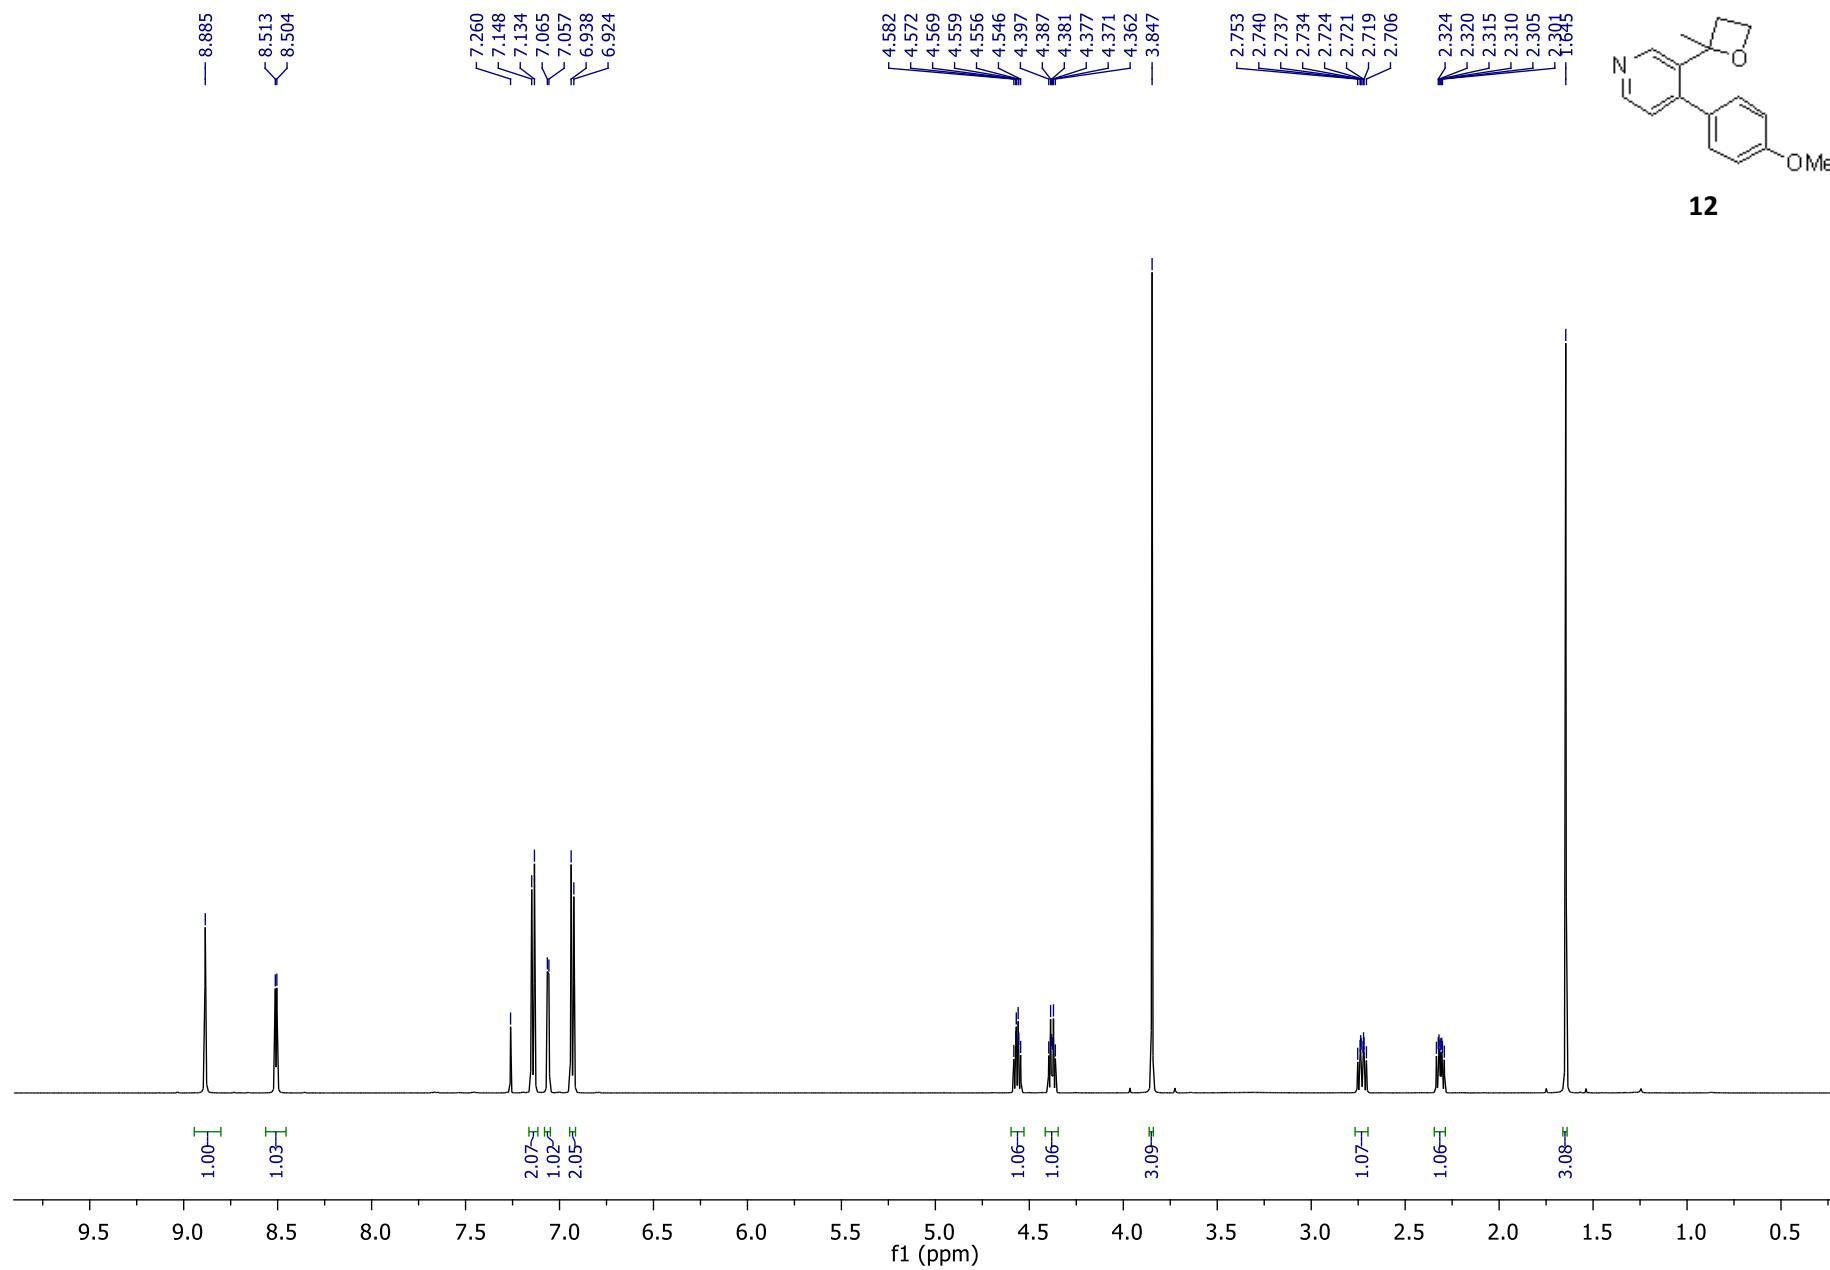

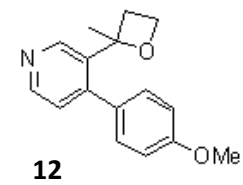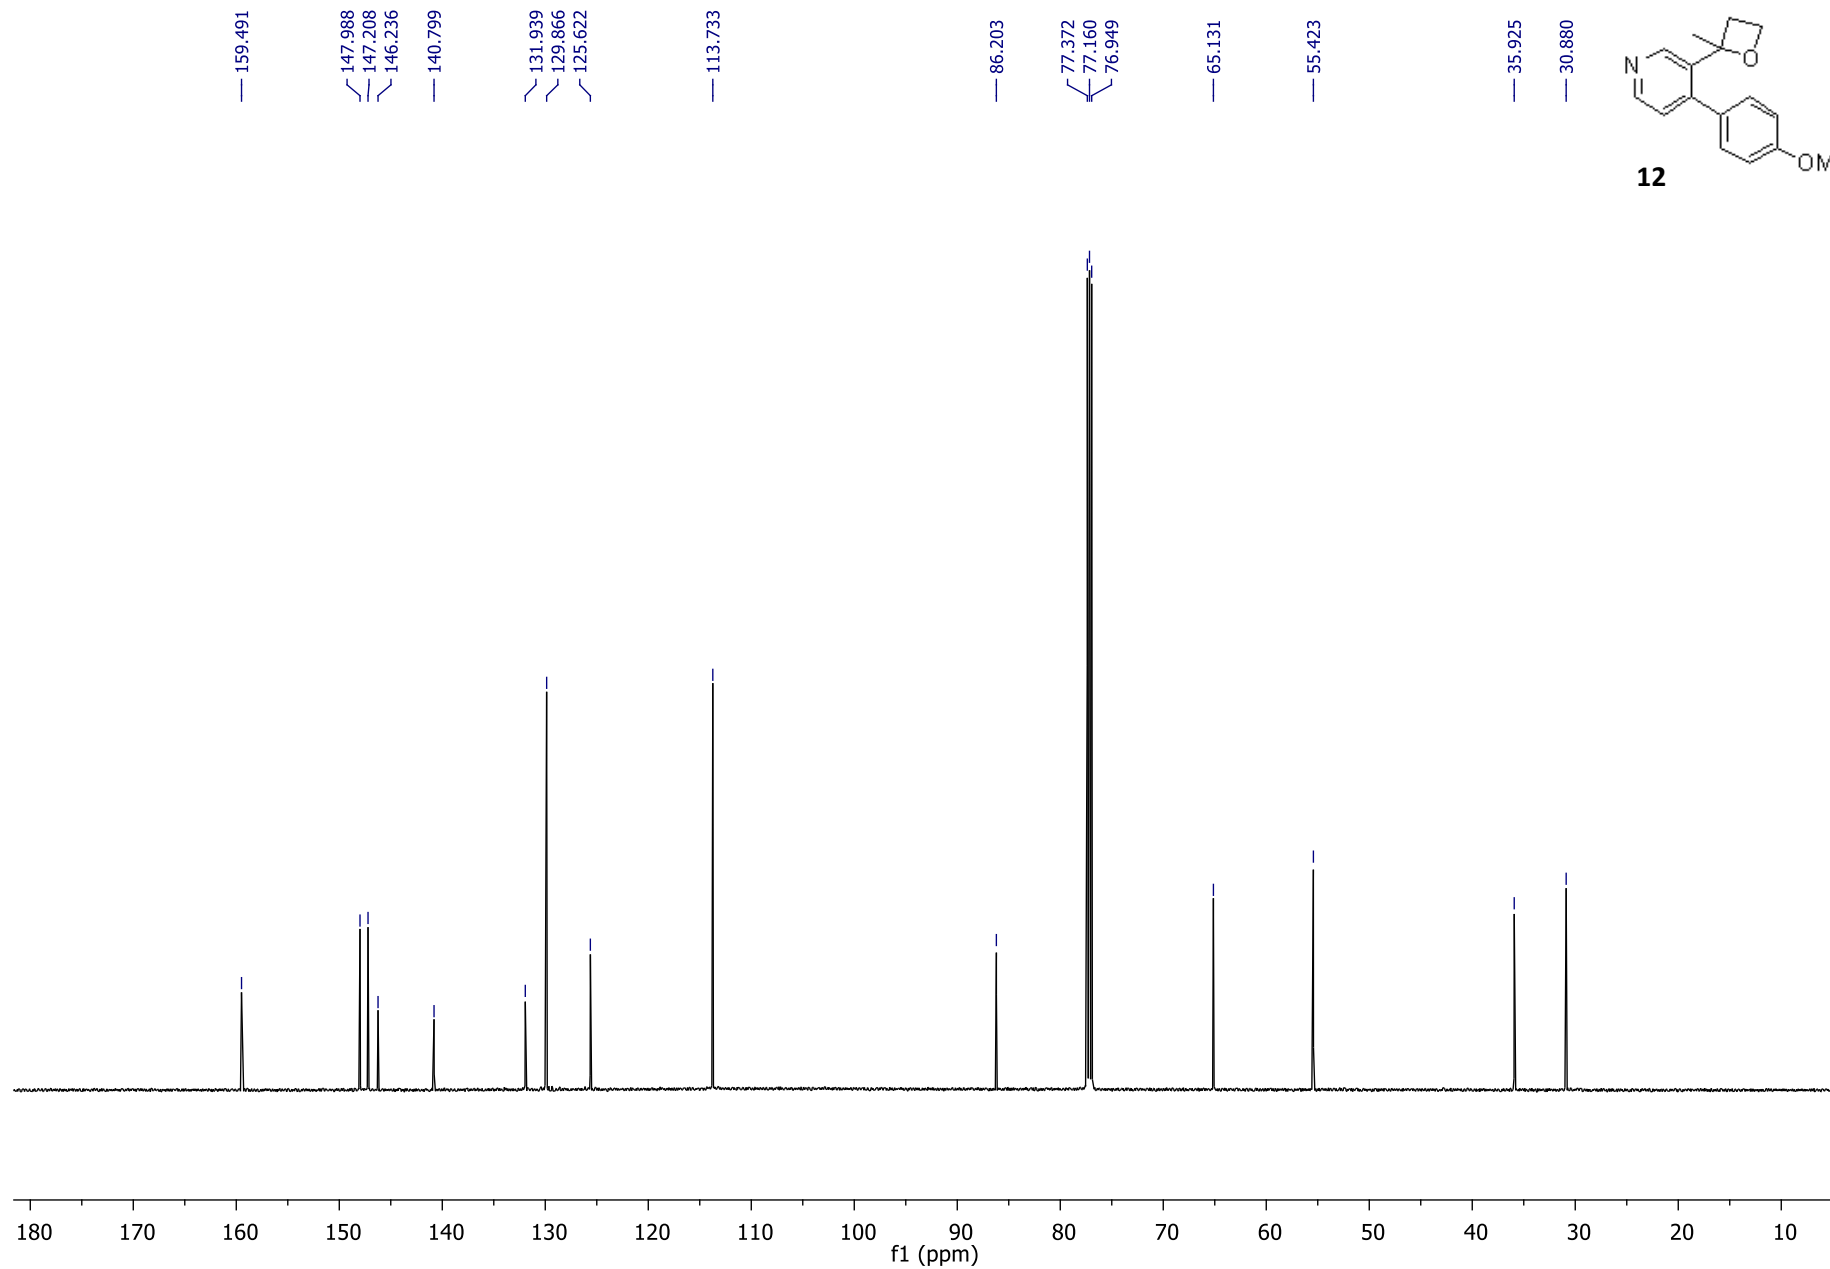

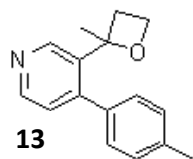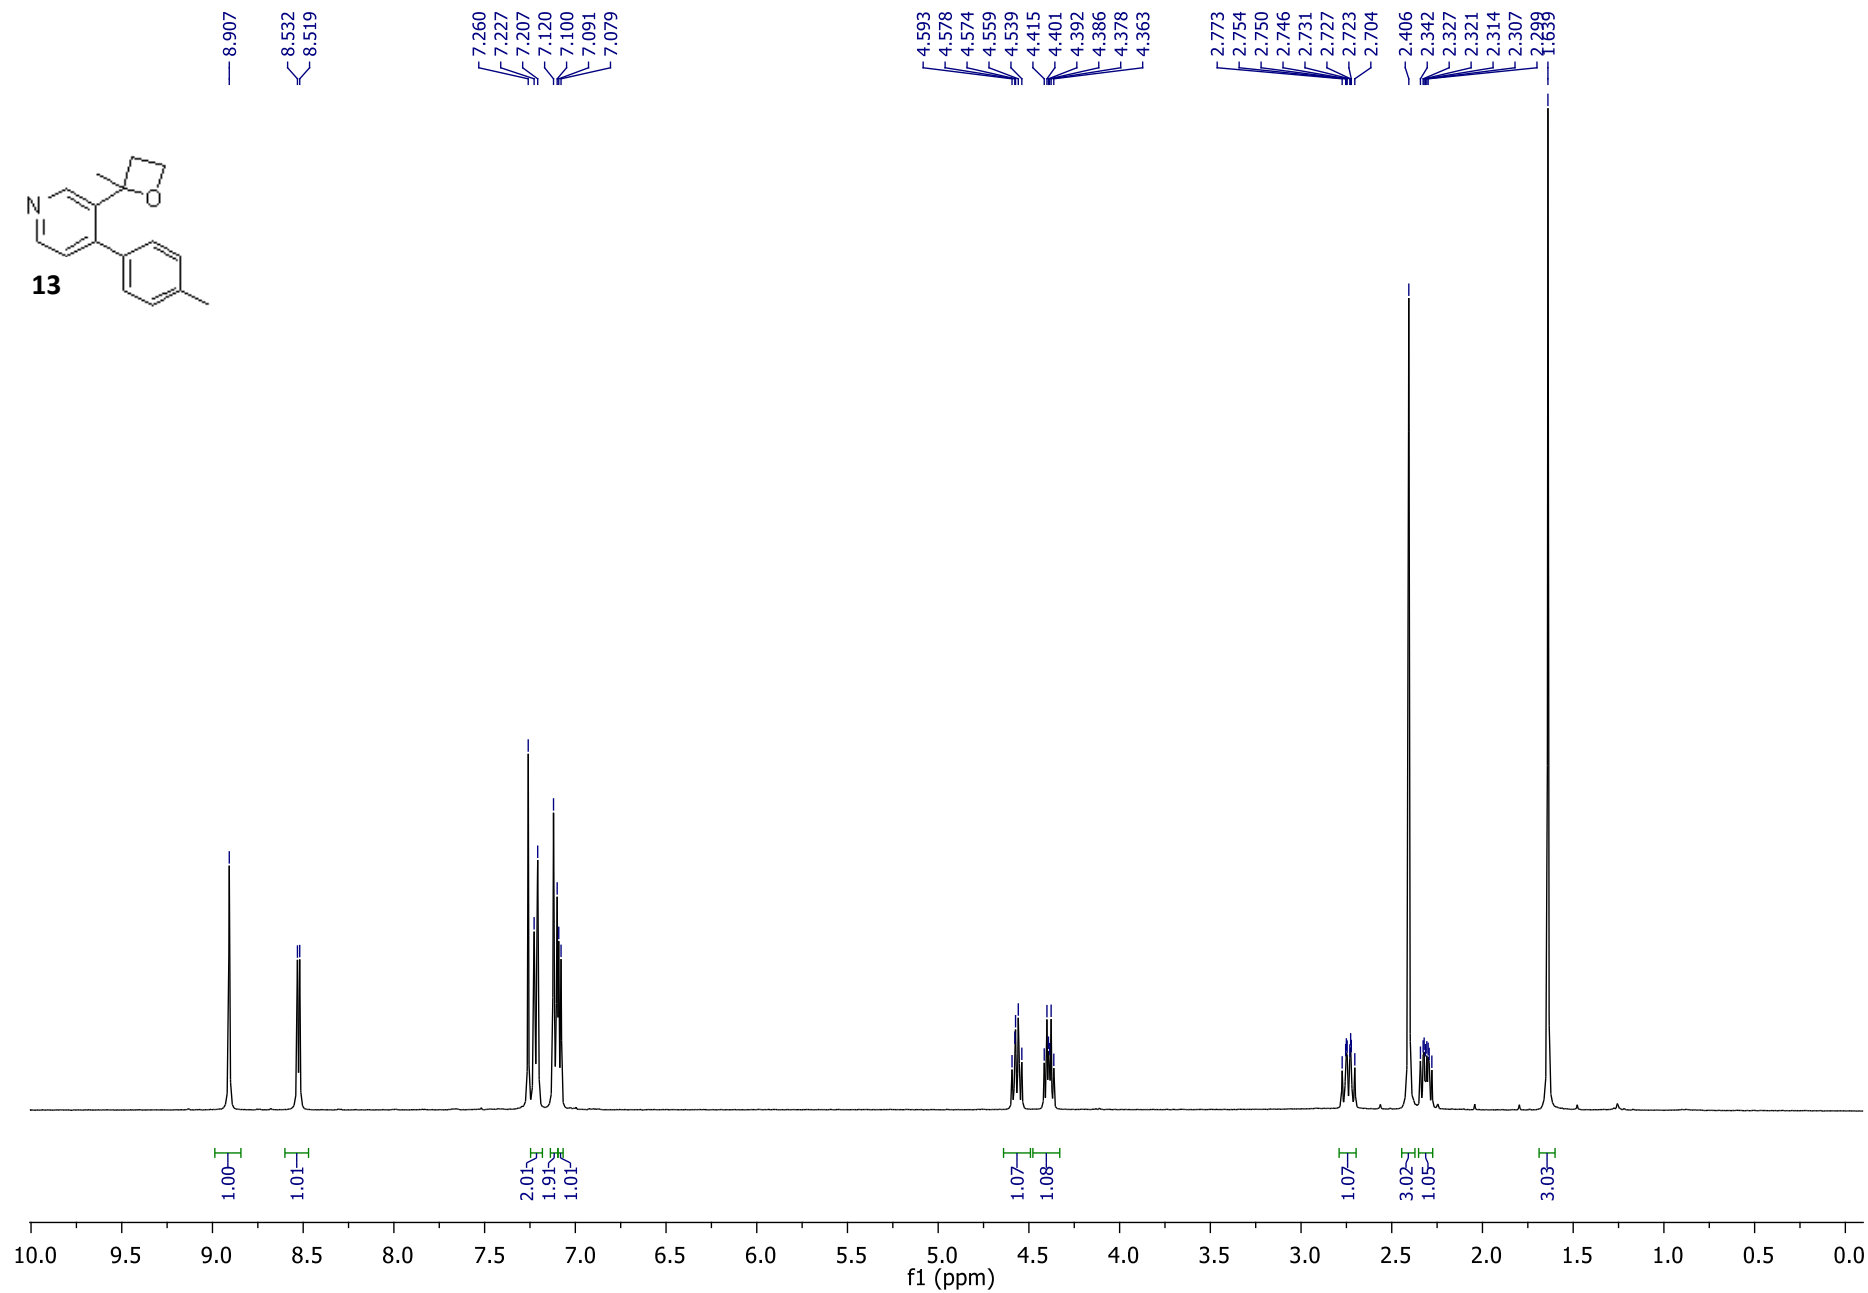



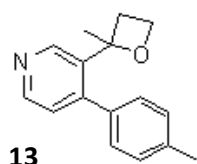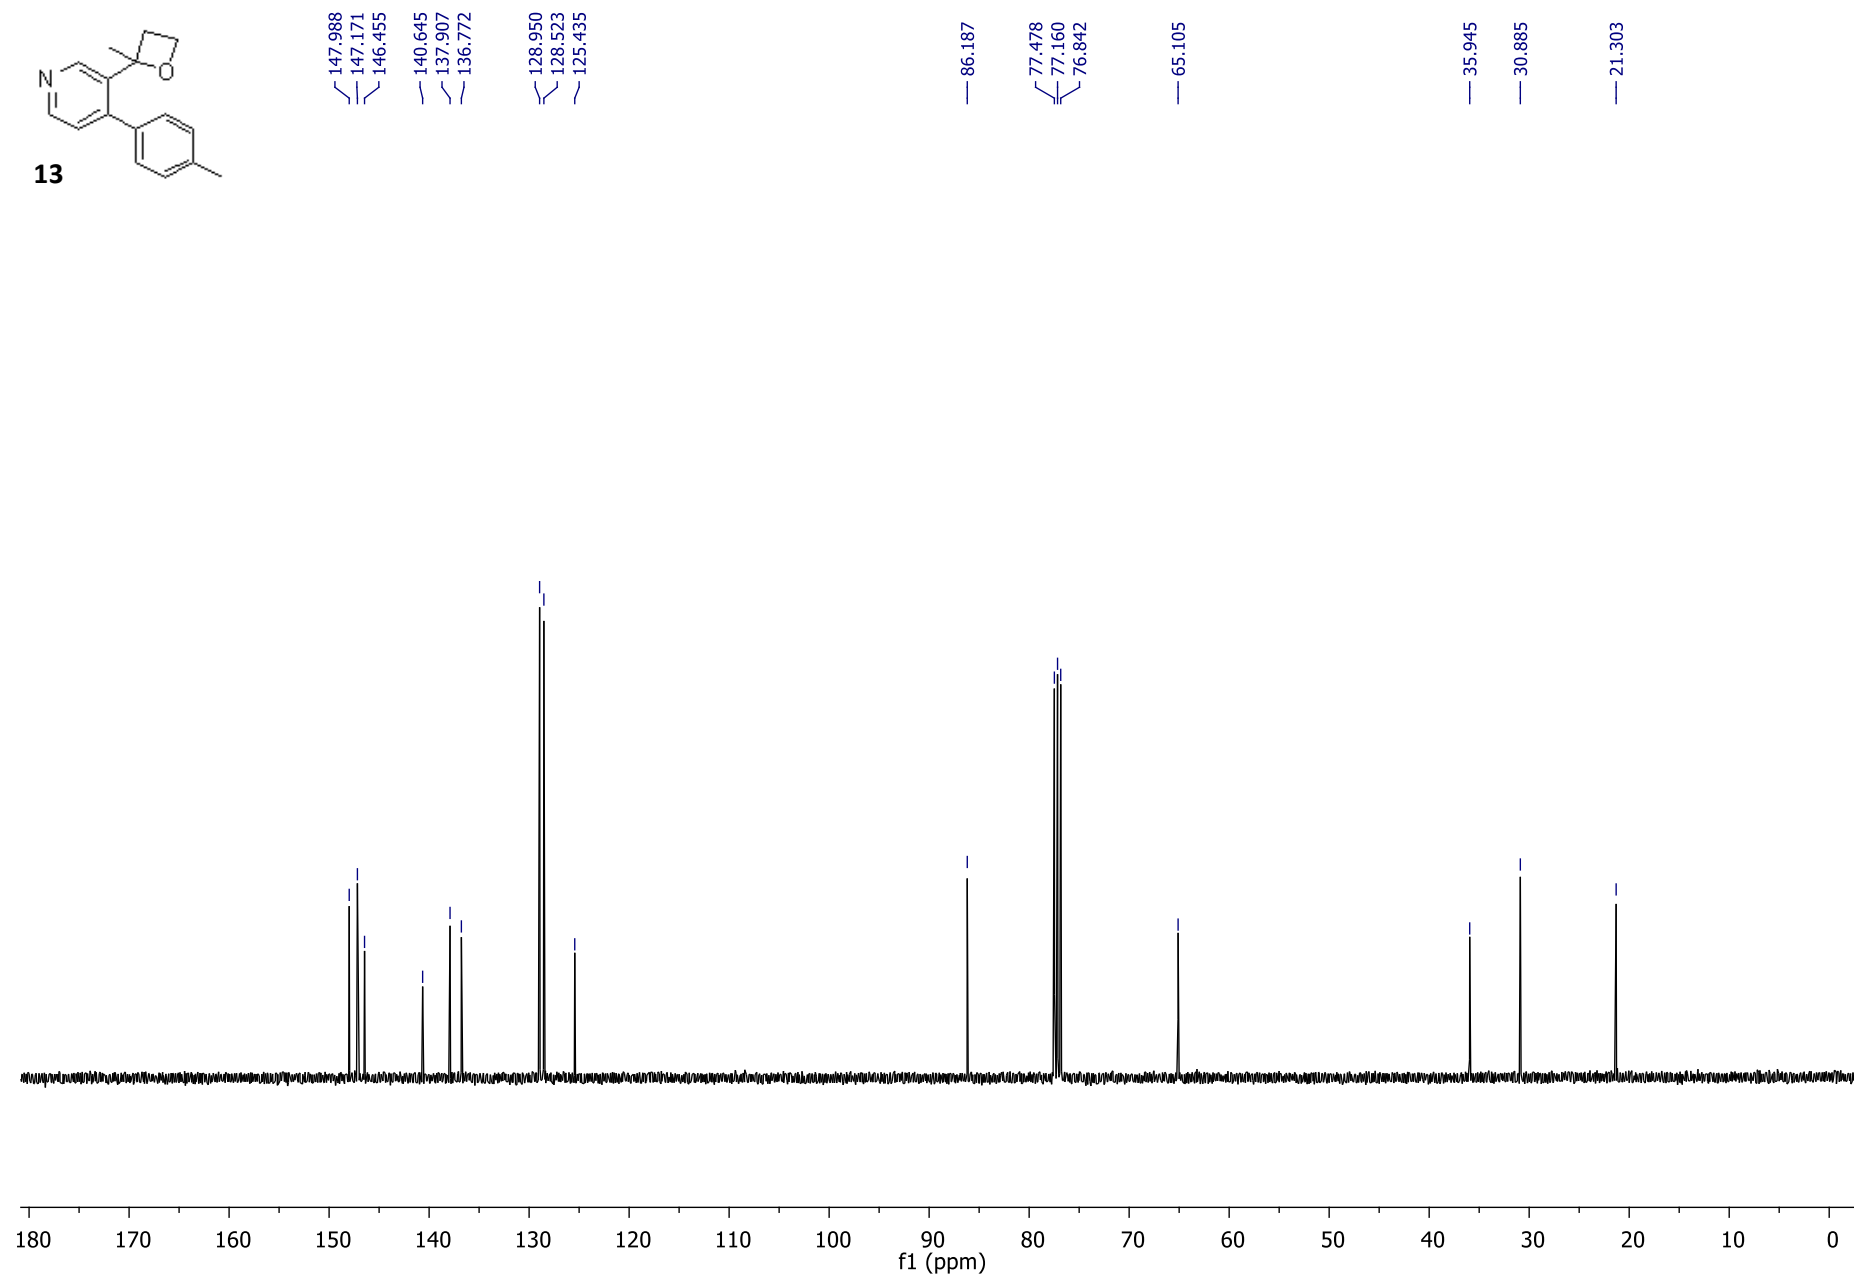

Supplement: c4cc03766a1.pdf [file c4cc03766a1.pdf]
